# Supplementary material for: CDK5RAP3, a New BRCA2 Partner That Regulates DNA Repair, Is Associated with Breast Cancer Survival
Source: Cancers (Basel). 2022 Jan 12;14(2):353. doi: 10.3390/cancers14020353 (PMC8773632; doi:10.3390/cancers14020353)
Supplement: Supplementary file 1 [file cancers-14-00353-s001.zip › Table S1.xlsx]

## Sheet: Combined BRCA1
Table S1. Results of the combined iCOGS and Oncoarray studies at the CDK5RAP3 locus (imputed and genotyped variants) in BRCA1 mutation carriers.
SNP	Chromosome	Position (hg19)	Frequency	r2	Typed (0/1)	Allele 1	Allele 2	breast cancer log HR	breast cancer P value	ovarian cancer log HR	ovarian cancer P value
17:46046754:C:G	17	46046754	0.0185064	0.702702	0	C	G	0.3137	0.0002028	-0.0927	0.4932
17:46076888:AAAAAC:A	17	46076888	0.0146709	0.55711	0	AAAAAC	A	-0.3469	0.001119	0.0769	0.6508
17:46097222:CA:C	17	46097222	0.12687	0.75874	0	CA	C	0.102	0.001372	-0.0627	0.2122
rs117717919:45969596:C:T	17	45969596	0.000458864	0.234327	0	C	T	-4.4622	0.002096	-2.1022	0.3785
17:46069545:G:A	17	46069545	0.004	0.600753	0	G	A	0.5902	0.002428	-0.6752	0.02914
17:45966643:T:<INS:ME:ALU>:45966922	17	45966643	0.0415539	0.756541	0	T	<INS:ME:ALU>	-0.1549	0.004036	0.0338	0.6929
rs189494213:46025106:G:T	17	46025106	0.004	0.88887	0	G	T	-0.424	0.009366	0.5732	0.01999
rs118060813:46092325:T:C	17	46092325	0.004	0.87874	0	T	C	0.4296	0.009599	-0.6675	0.007881
17:46094663:G:A	17	46094663	0.004	0.858706	0	G	A	-0.4182	0.01082	0.6321	0.01107
chr17_45969328_C_T	17	45969328	0.0454589	1	1	C	T	-0.1083	0.01512	0.1756	0.01204
rs111575522:46044544:C:A	17	46044544	0.0464589	0.988294	0	C	A	-0.1058	0.01697	0.1515	0.02935
17:46146959:CA:C	17	46146959	0.190424	0.706472	0	CA	C	0.0657	0.01878	-0.09	0.04075
17:46123777:A:C	17	46123777	0.002	0.539629	0	A	C	-0.6833	0.02046	0.4403	0.3501
17:46031057:G:A	17	46031057	0.007	0.358424	0	G	A	-0.465	0.02083	0.1084	0.7302
rs79218616:45996777:A:T	17	45996777	0.00454114	0.643892	0	A	T	-0.3966	0.02332	0.3102	0.2589
rs145119723:46007239:G:A	17	46007239	0.000541136	0.603292	0	G	A	0.9684	0.02395	-0.0149	0.982
rs200811233:45995474:TGAG:T	17	45995474	0.00154114	0.738282	0	TGAG	T	0.5855	0.02459	-0.6922	0.09984
rs184647363:46110189:C:T	17	46110189	0.002	0.909706	0	C	T	0.4915	0.02468	-0.7282	0.03532
rs149340516:46054846:G:A	17	46054846	0.000541136	0.923468	0	G	A	-0.8721	0.02501	-0.4311	0.4557
17:46122325:A:T	17	46122325	0.000458864	0.606943	0	A	T	1.1929	0.02542	0.0417	0.9591
rs200328340:46152331:A:G	17	46152331	0.00445886	0.860506	0	A	G	0.3326	0.02726	-0.5091	0.02637
rs376843567:46068904:G:T	17	46068904	0.001	0.697956	0	G	T	-0.7839	0.02744	0.0263	0.9605
17:46008587:T:TA	17	46008587	0.015883	0.910108	0	T	TA	0.1712	0.02836	0.0045	0.9709
rs117232302:46134227:G:A	17	46134227	0.001	0.572525	0	G	A	-0.7467	0.0333	-0.2324	0.6593
rs71377325:45982014:G:A	17	45982014	0.00291773	0.780305	0	G	A	-0.4275	0.03653	0.1147	0.7247
17:46132391:T:C	17	46132391	0.002	0.785177	0	T	C	-0.5479	0.03763	0.0873	0.8327
rs146338356:46065052:C:CCT	17	46065052	0.00708227	0.77793	0	C	CCT	0.2742	0.04278	-0.234	0.2705
rs117076490:46128244:A:T	17	46128244	0.0111645	0.965494	0	A	T	0.1817	0.04377	-0.0764	0.591
rs142460619:45980004:G:C	17	45980004	0.014883	0.97613	0	G	C	-0.1533	0.05169	0.0302	0.8114
rs138575974:45974058:T:G	17	45974058	0.014883	0.97513	0	T	G	0.1528	0.05265	-0.0332	0.7929
rs12051	17	46103760	0.394528	1	1	A	G	-0.0365	0.05294	0.0358	0.2275
rs9898218:46106634:G:T	17	46106634	0.394528	1	0	G	T	0.0362	0.05475	-0.0365	0.2191
17:46093815:G:A	17	46093815	0.001	0.761506	0	G	A	-0.639	0.05649	-0.2087	0.6919
rs2001226:45966977:T:C	17	45966977	0.0589177	0.988247	0	T	C	0.0746	0.0596	-0.1657	0.007747
rs111275166:46001193:G:A	17	46001193	0.001	0.377917	0	G	A	0.8108	0.06253	-1.3501	0.0461
rs55767350:46107035:CT:C	17	46107035	0.928788	0.738978	0	CT	C	-0.0793	0.06258	0.0234	0.7281
rs60869494:46141430:C:CA	17	46141430	0.00145886	0.458171	0	C	CA	-0.631	0.06343	0.8835	0.07737
17:46078261:T:C	17	46078261	0.005	0.80087	0	T	C	0.2796	0.06525	-0.5327	0.02034
rs141483368:46064515:C:T	17	46064515	0.0150823	0.908117	0	C	T	0.1483	0.06599	-0.1082	0.3965
rs11655047:46101949:G:T	17	46101949	0.0461298	0.997541	0	G	T	-0.0795	0.06929	0.0466	0.5018
rs139297106:46081192:C:T	17	46081192	0.0119652	0.970978	0	C	T	-0.1634	0.07102	0.0348	0.8114
rs190271018:46100954:G:C	17	46100954	0.001	0.621355	0	G	C	0.6545	0.07425	-0.2278	0.6923
rs181122870:45987336:C:A	17	45987336	0.001	0.543618	0	C	A	-0.82	0.07719	-0.1719	0.8114
rs151283745:45973153:C:A	17	45973153	0.001	0.544076	0	C	A	-0.8177	0.07813	-0.1709	0.8128
rs117660125:46157284:T:C	17	46157284	0.0445886	1	0	T	C	0.0779	0.07834	-0.0479	0.494
rs117428269:46093977:G:A	17	46093977	0.0461298	0.998	0	G	A	-0.0762	0.08146	0.0418	0.5455
rs16949422:45992632:C:G	17	45992632	0.00145886	0.629488	0	C	G	0.5384	0.08167	-0.0425	0.9268
rs117604496:46112922:C:T	17	46112922	0.0461298	0.999	0	C	T	-0.0755	0.08487	0.0395	0.5691
17:46100644:ATTT:AT	17	46100644	0.112541	0.994377	0	ATTT	AT	0.0493	0.08533	0.0172	0.7023
rs78113475:46118802:G:T	17	46118802	0.0461298	0.995377	0	G	T	-0.0752	0.08625	0.0392	0.5728
rs140676712:46119788:G:A	17	46119788	0.001	0.323838	0	G	A	0.7219	0.0869	-1.2178	0.06321
rs190535672:46011527:G:A	17	46011527	0.000541136	0.494499	0	G	A	1.0738	0.08896	-1.8449	0.06524
rs181161450:46003700:A:G	17	46003700	0.000541136	0.492958	0	A	G	-1.0727	0.08944	1.8473	0.06501
rs191329785:46094623:G:T	17	46094623	0.00145886	0.914779	0	G	T	-0.4976	0.09081	0.7144	0.1036
rs58554000:46095432:C:T	17	46095432	0.112	0.996459	0	C	T	0.0476	0.09672	0.0209	0.6432
rs113112932:46098242:G:A	17	46098242	0.112	0.996459	0	G	A	0.0476	0.09682	0.0186	0.6789
rs72823528:46098944:C:T	17	46098944	0.112	0.996459	0	C	T	0.0475	0.09727	0.0183	0.6839
rs185690469:45968791:C:A	17	45968791	0.00254114	0.62143	0	C	A	0.4271	0.0973	0.1574	0.7038
17:46118723:A:T	17	46118723	0.00254114	0.68525	0	A	T	-0.3845	0.1023	-0.0499	0.8919
rs12602670:46104880:T:C	17	46104880	0.112541	0.997459	0	T	C	-0.0466	0.1034	-0.0163	0.7168
rs139220224:46135072:G:T	17	46135072	0.000458864	0.679048	0	G	T	-0.8233	0.1043	-0.0242	0.9749
rs192465160:45948008:C:T	17	45948008	0.00145886	0.35862	0	C	T	-0.591	0.1045	1.4605	0.008215
rs77566800	17	46115972	0.0461298	1	1	A	G	0.0708	0.1052	-0.0416	0.5477
rs2525106:46041103:G:C	17	46041103	0.993541	0.996623	0	G	C	0.1945	0.1073	0.1015	0.5956
rs192837489:46082419:G:C	17	46082419	0.005	0.959459	0	G	C	-0.2106	0.1086	-0.1011	0.6246
rs2240119	17	46111172	0.112541	1	1	T	C	-0.0457	0.1096	-0.0151	0.737
rs62067378:45990050:A:G	17	45990050	0.002	0.80507	0	A	G	-0.3319	0.1102	0.685	0.03018
rs72823532:46111931:C:T	17	46111931	0.112541	1	0	C	T	0.0454	0.1125	0.0153	0.7339
rs4793738:46043370:G:A	17	46043370	0.70607	0.996	0	G	A	0.032	0.1149	0.063	0.0488
rs74777667	17	46042494	0.0515411	1	1	G	A	-0.0665	0.1157	0.113	0.0882
rs72823533:46116643:G:C	17	46116643	0.112541	0.998459	0	G	C	0.0449	0.1165	0.0158	0.7247
rs140933797:46121692:G:A	17	46121692	0.00245886	0.885548	0	G	A	0.3098	0.1173	0.8362	0.005841
rs58848175:46043282:A:G	17	46043282	0.391411	0.994082	0	A	G	-0.0295	0.1181	0.0278	0.3491
rs12602131:46119566:G:A	17	46119566	0.112541	0.998	0	G	A	0.0446	0.1187	0.0161	0.721
rs12601350:46120419:T:C	17	46120419	0.112541	0.997459	0	T	C	-0.0446	0.1194	-0.0161	0.7199
rs74412170:46117509:C:G	17	46117509	0.112541	0.996	0	C	G	-0.0443	0.1224	-0.0153	0.7346
rs72840229:45987660:C:T	17	45987660	0.0388702	0.903117	0	C	T	0.0777	0.1232	-0.0304	0.7001
rs16949318:45986328:G:A	17	45986328	0.0388702	0.902117	0	G	A	0.0775	0.1242	-0.0297	0.7065
rs58425874:46099922:C:CT	17	46099922	0.119377	0.954199	0	C	CT	0.0435	0.1261	0.0178	0.691
rs78785116:46002738:G:A	17	46002738	0.002	0.824823	0	G	A	0.3333	0.1263	-0.7658	0.02103
rs757353:46122270:A:G	17	46122270	0.112541	0.996459	0	A	G	-0.0437	0.1267	-0.017	0.7047
rs74927342:46106263:G:A	17	46106263	0.00154114	0.685399	0	G	A	0.4261	0.1269	-0.3622	0.416
rs148824303:46040223:T:C	17	46040223	0.00154114	0.261649	0	T	C	1.0456	0.1306	-0.7331	0.4932
rs41457949:46123983:G:A	17	46123983	0.040788	0.980212	0	G	A	0.0725	0.1323	-0.0182	0.8105
17:46096392:A:G	17	46096392	0.001	0.48891	0	A	G	-0.7257	0.1337	0.7573	0.2618
rs186583396:46013461:A:G	17	46013461	0.00554114	0.954835	0	A	G	0.1964	0.1368	0.151	0.4684
rs62064877:46097632:C:T	17	46097632	0.0252468	0.988294	0	C	T	0.0899	0.138	-0.1227	0.1981
rs2023885:46126373:G:A	17	46126373	0.108541	0.989918	0	G	A	0.0431	0.1392	0.0222	0.6281
rs61454280:46050125:C:T	17	46050125	0.27107	0.999541	0	C	T	0.0305	0.1425	-0.0475	0.1468
rs28624980:46106078:G:A	17	46106078	0.0283766	0.98287	0	G	A	-0.0836	0.1431	0.0379	0.6748
rs72833468:45949338:T:C	17	45949338	0.180693	0.974082	0	T	C	-0.0356	0.1433	0.1148	0.002744
rs12944587:45993200:C:G	17	45993200	0.00191773	0.971307	0	C	G	0.3333	0.1434	-0.1631	0.6551
rs2597170:46034247:A:G	17	46034247	0.994541	0.992294	0	A	G	-0.1958	0.1448	-0.1456	0.4981
rs368031557:46085574:CCCTGTCTCT:C	17	46085574	0.0548702	0.712329	0	CCCTGTCTCT	C	-0.0697	0.148	-0.0933	0.2196
rs2229369:46136133:G:C	17	46136133	0.110541	1	0	G	C	0.0417	0.148	0.0207	0.6472
17:46038278:A:C	17	46038278	0.005	0.369823	0	A	C	0.3397	0.1482	-0.8648	0.01982
17:46107926:C:T	17	46107926	0.002	0.956	0	C	T	0.3281	0.1496	-0.6391	0.0624
chr17_46126493_G_INDEL	17	46126492	0.110082	1	1	AG	A	0.0411	0.1542	0.0253	0.5767
rs3834970:46124390:GA:G	17	46124390	0.110082	0.996623	0	GA	G	0.041	0.1554	0.0213	0.6388
rs371148120:46137055:GCTGGACCTGGAC:GCTGGAC	17	46137055	0.110541	1	0	GCTGGACCTGGAC	GCTGGAC	0.0407	0.1573	0.0235	0.6037
rs55920502:46146505:C:T	17	46146505	0.111082	1	0	C	T	0.0407	0.1574	0.02	0.6578
rs2325783:46142907:A:G	17	46142907	0.111082	1	0	A	G	-0.0404	0.161	-0.0229	0.6133
rs202116680:46102207:T:TC	17	46102207	0.003	0.539997	0	T	TC	-0.3012	0.1616	0.2593	0.435
rs2240120:46142144:C:T	17	46142144	0.110541	0.998541	0	C	T	0.0403	0.1621	0.0229	0.6131
rs2597177	17	46060529	0.334117	1	1	G	A	-0.0273	0.1627	-0.0186	0.5447
rs12946143:46154943:C:T	17	46154943	0.111082	1	0	C	T	0.04	0.1648	0.0227	0.6159
rs16951519:46152291:G:A	17	46152291	0.111082	1	0	G	A	0.04	0.1653	0.0228	0.614
rs4995899:46150730:G:A	17	46150730	0.111082	1	0	G	A	0.0399	0.1656	0.0228	0.6135
rs112725447:46149651:G:A	17	46149651	0.111082	1	0	G	A	0.0399	0.1657	0.0229	0.6133
rs148500430:46130259:C:T	17	46130259	0.00616454	0.735851	0	C	T	0.1912	0.1659	-0.0567	0.7938
rs371324879:45954366:A:G	17	45954366	0.00145886	0.49932	0	A	G	0.4769	0.1679	-0.2575	0.6264
rs141612510:45987374:C:T	17	45987374	0.0684716	0.992459	0	C	T	-0.0508	0.1688	-0.0102	0.8623
rs61758369:46058612:A:G	17	46058612	0.00445886	0.995377	0	A	G	0.1908	0.1695	0.2885	0.1949
17:46082974:C:T	17	46082974	0.00208227	0.715265	0	C	T	-0.3216	0.1695	0.0297	0.9357
rs191902054:46048559:G:A	17	46048559	0.00445886	0.995377	0	G	A	-0.1908	0.1696	-0.2885	0.1949
rs186593346:46054675:C:T	17	46054675	0.00445886	0.995377	0	C	T	-0.1908	0.1696	-0.2885	0.1949
rs885635:46072228:C:T	17	46072228	0.271611	0.995541	0	C	T	0.0285	0.1714	-0.0447	0.1734
rs139453275:46039111:G:A	17	46039111	0.00445886	0.996918	0	G	A	-0.1898	0.1718	-0.2882	0.1954
rs117529076:46039308:C:T	17	46039308	0.00445886	0.996918	0	C	T	-0.1898	0.1718	-0.2882	0.1954
rs3764400	17	46123932	0.139706	1	1	T	C	-0.0359	0.1718	-0.0031	0.9396
rs12602894:45998014:T:C	17	45998014	0.994541	0.98393	0	T	C	-0.1836	0.1721	-0.1861	0.3865
rs11403605:46001705:A:AT	17	46001705	0.994541	0.98393	0	A	AT	-0.1836	0.1721	-0.1862	0.3863
rs185293095:46140583:G:A	17	46140583	0.001	0.755462	0	G	A	0.5928	0.1736	-0.6274	0.3557
rs76012308:45966706:G:A	17	45966706	0.0439177	0.952247	0	G	A	-0.063	0.1742	0.1188	0.1022
rs35928933:46097513:G:A	17	46097513	0.001	0.453025	0	G	A	-0.7098	0.1744	0.5322	0.5108
rs145435389:45971519:GTC:G	17	45971519	0.193399	0.995541	0	GTC	G	0.0319	0.1748	-0.0915	0.01361
rs138361282:45965172:G:A	17	45965172	0.00337659	0.708219	0	G	A	-0.2361	0.1771	-0.1284	0.6337
rs111326118:46011475:C:G	17	46011475	0.0100823	0.926152	0	C	G	0.1232	0.1774	0.1545	0.2664
rs117534940:46018870:T:A	17	46018870	0.00445886	0.99313	0	T	A	-0.1865	0.1778	-0.2939	0.1848
rs189486159:46000701:C:T	17	46000701	0.00445886	0.989883	0	C	T	-0.1862	0.1794	-0.2926	0.1878
rs117940541:46000079:G:A	17	46000079	0.00445886	0.989883	0	G	A	-0.1862	0.1795	-0.2926	0.1878
rs184057508:46127490:G:A	17	46127490	0.000458864	0.841029	0	G	A	0.417	0.1796	-0.0982	0.8351
rs2240121:46152322:T:C	17	46152322	0.106	0.995247	0	T	C	-0.0395	0.1805	-0.0103	0.8243
rs117736384:45994049:A:G	17	45994049	0.00445886	0.989342	0	A	G	0.1859	0.1806	0.2919	0.1892
rs150752051:45970975:T:G	17	45970975	0.0684716	0.988	0	T	G	0.0495	0.1807	0.0029	0.9606
17:46015142:C:G	17	46015142	0.000917728	0.78808	0	C	G	-0.4076	0.1809	-0.1073	0.8269
rs2229368	17	46134798	0.025	1	1	C	T	-0.0804	0.1809	0.0443	0.6412
rs117972490:46046649:G:A	17	46046649	0.27307	0.994541	0	G	A	0.0277	0.183	-0.04	0.2216
17:46018322:A:C	17	46018322	0.001	0.60531	0	A	C	-0.5586	0.1836	0.5063	0.4608
17:45990216:T:TTTTG	17	45990216	0.004	0.554444	0	T	TTTTG	0.2476	0.1888	0.2371	0.412
17:46150615:A:G	17	46150615	0.000458864	0.669731	0	A	G	-0.5301	0.1895	0.1832	0.7643
rs1986693	17	46026156	0.802601	1	1	A	G	0.0306	0.1899	-0.0869	0.01834
rs78054593:45957499:C:T	17	45957499	0.0495759	0.978082	0	C	T	0.0565	0.1903	-0.0341	0.6168
rs112725791:45951604:C:G	17	45951604	0.027788	0.610117	0	C	G	-0.1001	0.1906	0.2348	0.05429
17:45958966:C:T	17	45958966	0.002	0.725671	0	C	T	-0.3424	0.1915	0.0382	0.9289
rs76757053:46156945:T:A	17	46156945	0.0254589	1	0	T	A	-0.078	0.1937	0.0505	0.5944
rs4239170:45967278:T:C	17	45967278	0.995082	0.972718	0	T	C	-0.1742	0.1959	-0.1406	0.5128
rs145345454:46018053:T:G	17	46018053	0.0536582	0.976494	0	T	G	0.0539	0.1963	0.0015	0.9816
rs144269654:46037773:G:A	17	46037773	0.0217057	0.998459	0	G	A	-0.0818	0.197	-0.0105	0.916
rs11650044:45958009:T:C	17	45958009	0.995082	0.965801	0	T	C	-0.1727	0.1997	-0.1222	0.57
rs75222374:46104404:G:A	17	46104404	0.0244589	0.994	0	G	A	-0.078	0.1997	0.0236	0.8059
rs143279210:45973151:G:C	17	45973151	0.0684716	0.988459	0	G	C	-0.0475	0.1998	-0.0021	0.9716
rs146199012:45973793:A:T	17	45973793	0.0684716	0.988459	0	A	T	0.0474	0.2004	0.0034	0.9535
chr17_46024254_A_T	17	46024254	0.0424589	1	1	A	T	0.0587	0.2027	-0.1312	0.0696
rs139393864:46131209:A:AG	17	46131209	0.025	0.999	0	A	AG	0.0761	0.2051	-0.0428	0.6522
rs141502862:45993467:C:T	17	45993467	0.0684716	0.997	0	C	T	-0.0467	0.2053	-0.0108	0.8541
17:45996368:TAC:TACAC	17	45996368	0.631108	0.985082	0	TAC	TACAC	0.0244	0.2061	-0.0673	0.02635
rs181743042:45961164:A:C	17	45961164	0.00154114	0.636395	0	A	C	0.4129	0.207	-0.6819	0.1785
17:45973914:C:T	17	45973914	0.00254114	0.695984	0	C	T	0.3197	0.2075	0.3375	0.4015
chr17_46058901_C_T	17	46058901	0.00537659	1	1	C	T	-0.1628	0.2076	-0.0209	0.9164
rs151315565:46054026:G:A	17	46054026	0.00145886	0.769367	0	G	A	-0.4008	0.2092	0.7007	0.1599
rs77140348:46118595:A:G	17	46118595	0.025	0.987918	0	A	G	0.0762	0.2096	-0.0274	0.776
rs78997383:45968995:G:A	17	45968995	0.0684716	0.987459	0	G	A	-0.0464	0.2102	0.001	0.9863
chr17_46030753_G_T	17	46030753	0.0222468	1	1	G	T	-0.0786	0.2102	-0.0129	0.8954
rs199659813:45967427:GT:G	17	45967427	0.0684716	0.987459	0	GT	G	-0.0463	0.2114	0.0014	0.9812
17:46115009:TC:T	17	46115009	0.0244589	0.988918	0	TC	T	-0.0759	0.2119	0.0259	0.7875
rs140678315:45964945:C:T	17	45964945	0.0684716	0.986459	0	C	T	-0.0462	0.212	0.0019	0.9746
rs147596700:45963810:G:A	17	45963810	0.0684716	0.986459	0	G	A	-0.0462	0.2121	0.0021	0.9713
rs139490969:45962994:C:T	17	45962994	0.0684716	0.986918	0	C	T	-0.0462	0.2129	0.0022	0.9705
rs193042022:46099324:C:T	17	46099324	0.00308227	0.790313	0	C	T	0.2492	0.2136	0.5	0.1151
rs191088862:45975523:C:T	17	45975523	0.00445886	0.989342	0	C	T	-0.1743	0.2146	-0.2603	0.247
rs72823509:46044589:G:A	17	46044589	0.19394	0.994082	0	G	A	0.0292	0.2153	-0.0982	0.008178
rs2525104	17	46084026	0.781212	1	1	G	A	0.0275	0.2182	0.0681	0.05138
rs2525097:46077188:C:G	17	46077188	0.78313	0.991082	0	C	G	-0.0276	0.2197	-0.0525	0.1355
rs200409765:46053203:G:A	17	46053203	0.00254114	0.834022	0	G	A	0.2484	0.221	-0.4478	0.164
rs187330194:45967936:T:C	17	45967936	0.00445886	0.992589	0	T	C	0.1714	0.2225	0.2568	0.2534
rs111880286:45989170:CA:C	17	45989170	0.11313	0.633649	0	CA	C	0.0448	0.2233	-0.0204	0.7248
rs142453313:46028688:G:T	17	46028688	0.0221298	0.926377	0	G	T	-0.0811	0.2237	0.101	0.3405
rs183952826:45998679:A:G	17	45998679	0.001	0.627975	0	A	G	-0.4845	0.2266	0.2653	0.6758
rs11870317:46141292:A:G	17	46141292	0.807494	1	0	A	G	-0.0283	0.2271	0.0013	0.9725
rs7405753:46040409:A:T	17	46040409	0.994541	0.995459	0	A	T	-0.1562	0.2278	-0.106	0.6065
rs2525108:46041473:A:G	17	46041473	0.994541	0.995459	0	A	G	-0.156	0.2285	-0.1059	0.6066
rs146084401:46000197:G:A	17	46000197	0.0689305	0.997	0	G	A	-0.0443	0.2286	-0.0135	0.8182
rs8079982:46127756:G:A	17	46127756	0.192506	0.999459	0	G	A	-0.0282	0.2286	0.0009	0.981
rs12103663:46155800:T:C	17	46155800	0.807494	1	0	T	C	-0.0282	0.2287	0.0013	0.9724
rs9905460:46156072:C:G	17	46156072	0.807494	1	0	C	G	-0.0282	0.2287	0.0013	0.9725
rs77496633	17	46013618	0.0689305	1	1	T	G	0.044	0.2301	0.019	0.7439
rs181265059:46129603:C:T	17	46129603	0.00745886	0.926472	0	C	T	0.1344	0.2306	0.1226	0.4688
rs8182234:46139209:T:G	17	46139209	0.807494	1	0	T	G	-0.028	0.2316	0.0013	0.972
17:45989808:CT:C	17	45989808	0.172307	0.781567	0	CT	C	0.0327	0.2333	-0.0384	0.3753
17:46083487:A:G	17	46083487	0.001	0.449221	0	A	G	0.6072	0.2338	1.4861	0.07005
rs2525111:46042430:T:C	17	46042430	0.994541	0.993377	0	T	C	-0.1538	0.2353	-0.1102	0.5924
rs9899623:46094038:G:T	17	46094038	0.0263766	0.996541	0	G	T	-0.0698	0.2355	0.0419	0.6521
rs74683156:46019606:G:A	17	46019606	0.019	0.993541	0	G	A	-0.0829	0.2359	0.1773	0.1086
rs139257740:46078057:C:T	17	46078057	0.00308227	0.724677	0	C	T	0.2182	0.236	0.1957	0.5
17:46037844:A:G	17	46037844	0.00254114	0.831399	0	A	G	-0.2405	0.2363	0.4563	0.1562
rs2325715:45952785:A:G	17	45952785	0.995082	0.972143	0	A	G	-0.1638	0.2376	-0.2489	0.2619
rs138977289:46122888:G:A	17	46122888	0.014	0.437048	0	G	A	-0.1471	0.2376	-0.1336	0.4977
rs117405543:46013226:G:A	17	46013226	0.00345886	0.756744	0	G	A	0.2102	0.2377	-0.2699	0.3478
rs1962201:46025052:A:G	17	46025052	0.684095	0.997082	0	A	G	0.0235	0.238	-0.0651	0.03773
rs78963546:45950643:G:A	17	45950643	0.000541136	0.504325	0	G	A	-0.781	0.2396	1.4648	0.1585
17:46017258:A:G	17	46017258	0.00845886	0.563519	0	A	G	0.1638	0.2429	-0.2902	0.174
17:46017259:C:G	17	46017259	0.00845886	0.563519	0	C	G	0.1638	0.243	-0.2902	0.174
17:46017260:T:G	17	46017260	0.00845886	0.563519	0	T	G	0.1638	0.243	-0.2902	0.174
rs145682182:45964948:A:G	17	45964948	0.0689305	0.986459	0	A	G	0.0427	0.2465	0.0031	0.9583
rs186744709:46077282:C:T	17	46077282	0.001	0.734415	0	C	T	0.4898	0.2467	-0.7117	0.2833
rs200329132:45998374:TC:T	17	45998374	0.0197532	0.998	0	TC	T	-0.076	0.2468	-0.1261	0.2162
rs143783382:46081919:C:T	17	46081919	0.000458864	0.410098	0	C	T	0.586	0.2491	-0.8058	0.2886
rs72840238:45998346:G:C	17	45998346	0.00516454	0.891962	0	G	C	0.1632	0.2499	0.0336	0.8817
rs191750537:45964213:G:C	17	45964213	0.0689305	0.986459	0	G	C	-0.0424	0.25	-0.0066	0.9108
rs183585724:45964214:C:A	17	45964214	0.0689305	0.986459	0	C	A	-0.0424	0.2503	-0.0066	0.9106
rs150853499:45994116:G:T	17	45994116	0.002	0.449399	0	G	T	0.3753	0.2503	0.5353	0.3002
rs147883701:46019322:C:T	17	46019322	0.0593071	0.992377	0	C	T	-0.0455	0.2515	-0.0231	0.7144
17:46148636:C:T	17	46148636	0.002	0.671592	0	C	T	-0.3104	0.2521	0.1931	0.6177
rs183012650:45991715:C:T	17	45991715	0.00254114	0.85694	0	C	T	-0.2152	0.2533	-0.5383	0.06712
rs188766766:45991716:A:G	17	45991716	0.00254114	0.85694	0	A	G	0.2152	0.2533	0.5383	0.06712
rs35533494:45953785:G:A	17	45953785	0.146835	0.986623	0	G	A	-0.0296	0.258	0.1246	0.002511
rs35004787:45951709:G:C	17	45951709	0.146835	0.984623	0	G	C	-0.0296	0.2582	0.1245	0.002568
rs56119022:45951776:C:T	17	45951776	0.146835	0.984623	0	C	T	-0.0296	0.2582	0.1245	0.002568
rs192123848:46013386:G:A	17	46013386	0.0211298	0.932706	0	G	A	-0.0774	0.2582	0.111	0.3078
rs5820676:46078793:CA:C	17	46078793	0.47713	0.903623	0	CA	C	-0.0217	0.26	-0.0662	0.02906
rs73325389:46104645:A:G	17	46104645	0.0263766	0.990165	0	A	G	0.0663	0.262	-0.0348	0.7096
17:45981628:CA:C	17	45981628	0.0505886	0.64064	0	CA	C	0.0595	0.2624	-0.0652	0.4389
rs75777338:46014452:G:T	17	46014452	0.002	0.448316	0	G	T	0.3637	0.2626	0.5367	0.2961
rs72037996:46043986:CTT:C	17	46043986	0.271905	0.989459	0	CTT	C	-0.0233	0.2628	0.0389	0.2367
rs2428607:46040536:A:G	17	46040536	0.994	0.885614	0	A	G	-0.1315	0.2632	-0.0588	0.7517
17:46050112:C:T	17	46050112	0.00362341	0.785633	0	C	T	0.1914	0.2632	-0.3178	0.2527
rs66537807	17	46029963	0.366601	1	1	A	-	-0.0235	0.2638	-0.0166	0.6199
rs139821389:45976071:A:G	17	45976071	0.001	0.316031	0	A	G	-0.5528	0.2639	0.234	0.7724
rs185688216:46001485:C:T	17	46001485	0.00545886	0.840921	0	C	T	-0.1538	0.2663	-0.0391	0.8555
chr17_46066526_G_T	17	46066526	0.053117	1	1	T	G	0.0454	0.2729	0.0054	0.9332
rs370994594:46113244:C:T	17	46113244	0.000541136	0.72722	0	C	T	-0.4795	0.2735	0.8986	0.2029
rs189726960:46098507:G:C	17	46098507	0.00691773	0.941329	0	G	C	0.1258	0.2738	0.0793	0.6477
rs375579601:46066562:G:A	17	46066562	0.000541136	0.720879	0	G	A	-0.478	0.275	0.9	0.2022
rs72823513:46048920:A:G	17	46048920	0.197399	0.980788	0	A	G	-0.0257	0.2754	0.093	0.01226
rs183878870:45989823:T:C	17	45989823	0.040788	0.920987	0	T	C	-0.0526	0.2766	-0.0958	0.2093
rs186213784:46113351:C:T	17	46113351	0.0136234	0.886424	0	C	T	-0.0888	0.277	-0.0704	0.5852
rs6503984:46102156:G:T	17	46102156	0.36093	1	0	G	T	-0.0207	0.2776	0.0735	0.0144
rs882163	17	46093539	0.412143	1	1	C	T	-0.0202	0.2777	0.0773	0.008464
rs66721410:45952610:G:A	17	45952610	0.147377	0.985623	0	G	A	-0.0283	0.2788	0.1237	0.002688
rs145329017:46143140:T:C	17	46143140	0.00883546	0.964095	0	T	C	0.1081	0.2797	0.0352	0.8263
rs188189052:46143142:G:A	17	46143142	0.00883546	0.964095	0	G	A	-0.1081	0.2797	-0.0352	0.8263
rs12951323:46027565:A:C	17	46027565	0.800601	0.997	0	A	C	0.0252	0.2799	-0.0919	0.01242
rs6503985	17	46102157	0.36093	1	1	C	T	-0.0206	0.2806	0.0734	0.01448
rs192657182:45970217:C:T	17	45970217	0.006	0.992377	0	C	T	-0.1292	0.2809	0.0971	0.5976
17:46042993:T:C	17	46042993	0.00145886	0.491124	0	T	C	-0.3969	0.2814	1.0642	0.08159
17:45978515:CTTT:CTTTT	17	45978515	0.347636	0.952082	0	CTTT	CTTTT	0.0214	0.282	0.0153	0.6253
rs4794321:46028844:T:C	17	46028844	0.800601	0.997	0	T	C	0.025	0.2844	-0.0934	0.01108
rs8078698:46108951:A:C	17	46108951	0.0269177	0.987165	0	A	C	0.0624	0.2893	-0.0325	0.7271
rs35702577:45953990:T:G	17	45953990	0.147377	0.988623	0	T	G	0.0277	0.2894	-0.1219	0.003046
rs11652891:46078269:T:C	17	46078269	0.150247	0.911247	0	T	C	0.0285	0.2912	-0.0329	0.4363
rs142027395:46124160:CTGCT:C	17	46124160	0.00708227	0.651528	0	CTGCT	C	-0.1394	0.2922	0.1796	0.3816
rs75924152:46120970:G:A	17	46120970	0.001	0.522313	0	G	A	-0.3889	0.2933	-0.5257	0.363
rs55734605:46032330:T:TC	17	46032330	0.800601	0.997459	0	T	TC	0.0244	0.2948	-0.0932	0.01113
rs184327381:46135439:T:G	17	46135439	0.00591773	0.710007	0	T	G	0.1405	0.2952	0.2246	0.2948
rs192547075:45976553:T:C	17	45976553	0.007	0.945294	0	T	C	-0.1182	0.2955	-0.1813	0.2904
rs10545074:46094511:CAATA:C	17	46094511	0.279013	0.932952	0	CAATA	C	-0.0223	0.2971	-0.0103	0.7599
rs117441019:45948939:T:C	17	45948939	0.00445886	0.964484	0	T	C	0.1447	0.2995	0.2617	0.2416
rs56947799:45994524:T:C	17	45994524	0.0206709	0.997	0	T	C	0.0655	0.3012	0.1173	0.2343
rs111682782:46003799:C:T	17	46003799	0.0206709	0.997	0	C	T	-0.0655	0.3013	-0.1173	0.2343
rs4793693:45957398:T:C	17	45957398	0.146918	0.991082	0	T	C	0.027	0.302	-0.1204	0.003422
rs4794225:45957591:T:G	17	45957591	0.146918	0.991082	0	T	G	0.0269	0.3022	-0.1204	0.003423
17:45983034:C:G	17	45983034	0.002	0.970576	0	C	G	-0.211	0.3029	0.0208	0.9469
rs376488138:45954358:A:G	17	45954358	0.00145886	0.492921	0	A	G	0.3492	0.3038	-0.1831	0.725
rs143789223:45998722:C:G	17	45998722	0.001	0.406377	0	C	G	-0.577	0.305	-0.4515	0.5915
rs5820679:46097404:GT:G	17	46097404	0.757	0.994623	0	GT	G	0.0221	0.306	0.0458	0.1753
rs183184314:46138088:C:G	17	46138088	0.000541136	0.351154	0	C	G	0.5689	0.307	0.3396	0.6887
17:45951221:T:C	17	45951221	0.00445886	0.981342	0	T	C	0.1427	0.3077	0.2744	0.2197
17:46078545:CATAA:C	17	46078545	0.00445886	0.553921	0	CATAA	C	-0.2125	0.3087	-0.0697	0.8279
rs12948368:45957975:A:G	17	45957975	0.146918	0.990541	0	A	G	0.0265	0.3094	-0.1203	0.003437
rs73985445:46023160:G:A	17	46023160	0.0206709	0.992459	0	G	A	-0.0643	0.3108	-0.1225	0.2149
rs2737:46059071:T:C	17	46059071	0.21687	1	0	T	C	0.0226	0.3118	0.0504	0.15
rs736387:46059368:G:A	17	46059368	0.21687	1	0	G	A	-0.0225	0.3131	-0.0503	0.1513
rs80010748:45961369:C:A	17	45961369	0.001	0.451835	0	C	A	0.604	0.3132	-0.0744	0.9347
rs11651625	17	46006609	0.0880475	1	1	G	C	0.0325	0.3147	0.1037	0.04131
rs202133524:46115808:TCTAA:T	17	46115808	0.024212	0.959424	0	TCTAA	T	0.061	0.315	0.1105	0.2485
rs146732730:46076087:T:C	17	46076087	0.00816454	0.869304	0	T	C	-0.1121	0.3155	-0.0702	0.6893
rs145264939:45966654:G:A	17	45966654	0.001	0.453294	0	G	A	0.5978	0.3181	-0.0766	0.9327
rs142981153:46094617:C:T	17	46094617	0.003	0.560962	0	C	T	0.1987	0.3184	-0.2137	0.4879
rs374822508:46085599:CAAAAAAAAAATT:C	17	46085599	0.0604114	0.764506	0	CAAAAAAAAAATT	C	-0.0443	0.3194	-0.107	0.1283
rs371184774:46085585:CTAAAAAAAAAATA:C	17	46085585	0.0604114	0.764506	0	CTAAAAAAAAAATA	C	-0.0443	0.3195	-0.107	0.1283
rs182497718:46046179:G:A	17	46046179	0.00545886	0.843874	0	G	A	-0.1358	0.3219	-0.1542	0.4674
rs10717827:46102198:CT:C	17	46102198	0.756	0.998541	0	CT	C	-0.0213	0.3223	-0.0446	0.186
rs147117201:46044282:T:G	17	46044282	0.004	0.924377	0	T	G	-0.1383	0.3229	0.2656	0.2247
rs61406735:46107036:T:C	17	46107036	0.0185411	0.633209	0	T	C	0.0934	0.3241	-0.2576	0.08291
17:45956819:T:G	17	45956819	0.014	0.90026	0	T	G	0.0811	0.3243	-0.2023	0.118
rs35480192:45958731:G:A	17	45958731	0.147377	0.991541	0	G	A	-0.0257	0.3245	0.1202	0.003466
17:45966687:CTT:C	17	45966687	0.000458864	0.896532	0	CTT	C	-0.4004	0.3245	1.0375	0.1083
rs2597178	17	46060841	0.21787	1	1	C	T	-0.022	0.3246	-0.049	0.1619
rs183279639:46010167:C:T	17	46010167	0.000458864	0.914943	0	C	T	0.3965	0.3247	-1.0414	0.1039
rs180867792:46017061:C:T	17	46017061	0.000458864	0.914943	0	C	T	0.3962	0.3251	-1.0415	0.1038
rs150586473:45963108:T:C	17	45963108	0.000458864	0.895532	0	T	C	-0.3995	0.3257	1.0374	0.1084
rs146908495:45998105:T:A	17	45998105	0.000458864	0.91432	0	T	A	0.3957	0.326	-1.0413	0.1041
rs372385638:45984426:CA:C	17	45984426	0.000458864	0.905285	0	CA	C	-0.3975	0.3271	1.0469	0.1045
rs141983672:45960908:C:A	17	45960908	0.000458864	0.895532	0	C	A	0.3981	0.3276	-1.0379	0.1083
rs117803378:45960345:A:T	17	45960345	0.000458864	0.895073	0	A	T	-0.398	0.3277	1.0381	0.1082
rs140434790:45984609:G:A	17	45984609	0.000458864	0.907367	0	G	A	0.3953	0.3292	-1.0411	0.106
rs143175555:46025728:G:A	17	46025728	0.00945886	0.876481	0	G	A	0.0953	0.3306	-0.1009	0.5054
rs149561617:45965190:G:A	17	45965190	0.000458864	0.893696	0	G	A	0.3953	0.3307	-1.0276	0.1117
rs140103969:45980760:G:A	17	45980760	0.000458864	0.904744	0	G	A	0.3942	0.3308	-1.0345	0.1085
rs188219038:45980260:T:C	17	45980260	0.000458864	0.904744	0	T	C	-0.3942	0.3309	1.0336	0.1088
rs117863412:45978879:C:T	17	45978879	0.000458864	0.903744	0	C	T	0.3938	0.3315	-1.0309	0.1098
rs145760936:45976706:A:G	17	45976706	0.000458864	0.902662	0	A	G	-0.3931	0.3325	1.0272	0.1112
rs142300921:46115894:T:C	17	46115894	0.004	0.972788	0	T	C	-0.1257	0.3328	0.1213	0.548
rs78317601:45986496:A:G	17	45986496	0.0880475	0.992	0	A	G	-0.0313	0.3334	-0.1008	0.04828
17:46049056:C:T	17	46049056	0.000458864	0.66626	0	C	T	0.5514	0.3334	0.5884	0.4999
rs58719887:46016784:CA:C	17	46016784	0.258706	0.826801	0	CA	C	-0.0223	0.336	0.022	0.5453
rs62067368:45959156:C:T	17	45959156	0.147377	0.991541	0	C	T	-0.0251	0.3361	0.1185	0.003924
rs117990138:46116462:G:A	17	46116462	0.0743766	0.997	0	G	A	0.0337	0.3365	0.1	0.07078
rs114263199:46032297:T:G	17	46032297	0.0618482	0.994835	0	T	G	0.0375	0.3366	0.042	0.4994
rs374324897:46081286:GC:GCC	17	46081286	0.28207	0.994623	0	GC	GCC	-0.0198	0.3383	0.0454	0.1624
rs11649750:45950022:G:T	17	45950022	0.177952	0.971541	0	G	T	0.0234	0.3389	0.0196	0.6104
rs35132293:45954724:G:T	17	45954724	0.147377	0.986	0	G	T	-0.0249	0.3402	0.1179	0.004169
rs4794401:46118534:A:T	17	46118534	0.807212	0.987918	0	A	T	-0.0224	0.3402	-0.0658	0.0738
rs193158901:46085690:C:T	17	46085690	0.012	0.891506	0	C	T	0.0859	0.3404	-0.0524	0.7139
chr17_45960449_A_G	17	45960449	0.213611	1	1	G	A	0.0215	0.3408	-0.1039	0.003409
rs117756696:46135674:A:G	17	46135674	0.00616454	0.785209	0	A	G	0.1134	0.3412	-0.3598	0.06912
rs16949761:46033168:C:T	17	46033168	0.00345886	0.951494	0	C	T	-0.155	0.3424	0.0082	0.9746
rs116013364:46033412:C:G	17	46033412	0.0618482	0.996377	0	C	G	0.037	0.3435	0.0428	0.4911
17:45955044:G:A	17	45955044	0.00454114	0.545892	0	G	A	-0.1717	0.3441	0.304	0.2875
rs8076163:46120325:T:C	17	46120325	0.808753	0.991	0	T	C	-0.0222	0.3443	-0.065	0.07763
rs2597164:46069980:C:T	17	46069980	0.217411	0.995541	0	C	T	-0.0211	0.3451	-0.0518	0.1397
rs2923063:46045621:T:C	17	46045621	0.979329	0.997459	0	T	C	-0.0601	0.3485	-0.1614	0.1057
rs16949875:46046377:T:C	17	46046377	0.00345886	0.531326	0	T	C	-0.1754	0.3485	0.1642	0.5712
rs1051001:46137905:C:T	17	46137905	0.0777532	0.999459	0	C	T	0.0322	0.3487	0.0866	0.1103
rs2325750:46022330:G:A	17	46022330	0.683636	0.993706	0	G	A	-0.0185	0.3527	0.0656	0.03628
rs7210041:46113822:C:T	17	46113822	0.0777532	0.998541	0	C	T	0.0319	0.3529	0.098	0.07089
rs144298070:45956199:G:A	17	45956199	0.000458864	0.868718	0	G	A	0.3712	0.3536	-0.9172	0.1468
rs201261614:46115084:T:TGG	17	46115084	0.999541	0.314276	0	T	TGG	-0.7266	0.3552	2.4486	0.04272
rs190020380:46113124:T:C	17	46113124	0.00191773	0.881535	0	T	C	-0.204	0.3554	-0.3838	0.2844
rs112771900:45954749:T:C	17	45954749	0.000458864	0.86726	0	T	C	-0.3688	0.3556	0.9066	0.1503
rs186007670:46088273:G:A	17	46088273	0.0136234	0.88526	0	G	A	-0.0756	0.3559	-0.0785	0.5434
rs117126973:46013449:A:T	17	46013449	0.00491773	0.821848	0	A	T	-0.1342	0.3565	0.2238	0.3353
rs2597167	17	46047656	0.979329	1	1	T	C	-0.0589	0.3581	-0.1612	0.1062
rs8067216:46088197:G:A	17	46088197	0.284905	0.996	0	G	A	0.0189	0.3583	-0.0506	0.1187
rs149047977:45952874:C:T	17	45952874	0.000458864	0.866342	0	C	T	0.365	0.3591	-0.8917	0.1555
rs12949191:45996788:A:T	17	45996788	0.470108	0.989918	0	A	T	0.0171	0.3594	0.002	0.9443
rs2875735:46030050:T:C	17	46030050	0.368519	0.998	0	T	C	0.0176	0.3598	0.026	0.3895
rs16949676:46024500:G:C	17	46024500	0.0890475	0.994459	0	G	C	0.0294	0.3625	0.1017	0.04538
rs11657628:46045923:G:A	17	46045923	0.0292468	0.968718	0	G	A	-0.0493	0.3629	0.0935	0.2737
17:45957891:C:T	17	45957891	0.001	0.546788	0	C	T	0.3553	0.3633	-0.2256	0.7102
17:45984672:C:T	17	45984672	0.001	0.541586	0	C	T	0.416	0.3641	-0.2349	0.7447
rs60163848:45963839:A:T	17	45963839	0.00191773	0.920462	0	A	T	-0.1954	0.365	-0.0919	0.7861
rs140624474:46096700:T:C	17	46096700	0.0292468	0.988377	0	T	C	0.0488	0.365	-0.0779	0.3583
rs112940396:46030675:G:T	17	46030675	0.0623071	0.993753	0	G	T	-0.0351	0.3655	-0.04	0.5174
rs1317850:46121839:T:C	17	46121839	0.808753	0.989	0	T	C	-0.0212	0.3671	-0.0673	0.06803
17:45961730:T:A	17	45961730	0.00354114	0.666905	0	T	A	0.15	0.3674	-0.3318	0.1838
chr17_45976565_C_T	17	45976565	0.00191773	1	1	T	C	0.2224	0.3682	-0.3591	0.3768
rs189763890:46075991:C:T	17	46075991	0.006	0.966987	0	C	T	-0.1144	0.369	0.0318	0.8701
rs114759915:46117470:C:T	17	46117470	0.078212	0.997541	0	C	T	0.0308	0.3691	0.0921	0.08891
17:46151186:CAAA:C	17	46151186	0.337212	0.968788	0	CAAA	C	-0.0175	0.3717	0.0138	0.6525
rs79515268:46023954:A:G	17	46023954	0.0885064	0.998459	0	A	G	-0.0288	0.3726	-0.1025	0.04371
rs7220104:46024660:A:C	17	46024660	0.380978	0.994541	0	A	C	0.017	0.3744	0.0118	0.696
rs2525100:46077882:G:A	17	46077882	0.00145886	0.966225	0	G	A	0.2126	0.3757	0.1117	0.7703
rs4413003:45961829:C:T	17	45961829	0.97887	0.997459	0	C	T	0.057	0.376	-0.1496	0.1406
rs4378657	17	46023694	0.0885064	1	1	G	A	0.0286	0.376	0.1028	0.04309
rs9894188:46044031:C:T	17	46044031	0.614446	0.996	0	C	T	0.0167	0.3761	-0.0574	0.05327
rs9895554:46123642:A:C	17	46123642	0.0805886	0.996082	0	A	C	-0.0299	0.377	-0.0772	0.1479
rs7208707:45994724:A:C	17	45994724	0.472108	0.999	0	A	C	0.0164	0.3776	0.0017	0.9546
rs80347400	17	46012502	0.136823	1	1	A	G	-0.0236	0.3781	0.1219	0.004
rs2228253:45994044:C:T	17	45994044	0.472567	1	0	C	T	-0.0163	0.3796	-0.0017	0.9545
rs113516984:45964442:T:C	17	45964442	0.21307	0.998	0	T	C	-0.0198	0.3805	0.1021	0.004073
rs2228251	17	45994094	0.472567	1	1	T	C	0.0163	0.3805	0.002	0.9442
rs142140101:46043258:C:T	17	46043258	0.0613071	0.998	0	C	T	-0.0341	0.3818	-0.0335	0.59
rs35478586:46039128:A:C	17	46039128	0.00191773	0.985459	0	A	C	0.169	0.3826	-0.2635	0.3864
rs11654627:46137021:G:A	17	46137021	0.0282468	0.998	0	G	A	-0.0474	0.3831	0.0633	0.4597
rs2525083:46047229:C:G	17	46047229	0.210952	0.999	0	C	G	0.0197	0.3839	0.0472	0.1824
rs757352	17	46097153	0.807212	1	1	A	G	-0.0203	0.3847	-0.0711	0.05242
rs186630782:46080923:C:G	17	46080923	0.002	0.481718	0	C	G	-0.2388	0.3849	-0.1282	0.769
rs67369540:46009938:AT:A	17	46009938	0.674883	0.925753	0	AT	A	-0.0178	0.3861	0.0614	0.05701
17:46084343:C:T	17	46084343	0.000917728	0.544709	0	C	T	0.3008	0.3865	0.9242	0.08234
rs2525099:46077661:A:G	17	46077661	0.00145886	0.965848	0	A	G	-0.2069	0.3886	-0.1025	0.7887
rs2255814:46049125:C:T	17	46049125	0.210411	0.998082	0	C	T	-0.0195	0.3888	-0.0524	0.139
rs138373764:46030089:G:A	17	46030089	0.00654114	0.933212	0	G	A	-0.1088	0.389	0.07	0.7229
rs141131264:46036219:T:C	17	46036219	0.0608482	0.998459	0	T	C	0.0336	0.3901	0.0385	0.536
rs182365555:46090263:C:T	17	46090263	0.001	0.789883	0	C	T	0.2566	0.3902	-0.5083	0.2484
rs141135915:46002454:G:A	17	46002454	0.004	0.899541	0	G	A	0.1196	0.3913	-0.2977	0.1728
rs150641900:46041632:G:A	17	46041632	0.0613893	0.999	0	G	A	-0.0334	0.3913	-0.0365	0.5569
rs2525095	17	46037277	0.477563	1	1	A	T	-0.0157	0.3925	0.058	0.04508
17:46089946:G:A	17	46089946	0.00354114	0.701519	0	G	A	0.1739	0.3939	0.4344	0.1752
rs112195187:45948357:A:G	17	45948357	0.001	0.841082	0	A	G	0.3013	0.3948	-0.2702	0.6159
rs143702930:46146373:C:T	17	46146373	0.00516454	0.675107	0	C	T	0.1398	0.395	-0.1585	0.542
chr17_45959996_C_T	17	45959996	0.97887	1	1	C	T	0.0547	0.3951	-0.1515	0.1352
rs117415513:46050218:A:G	17	46050218	0.00945886	0.902351	0	A	G	-0.0874	0.3961	0.2805	0.07534
rs886444	17	46051911	0.387857	1	1	G	A	0.0161	0.3963	-0.0228	0.4444
rs79730487:45972413:T:G	17	45972413	0.623446	0.969623	0	T	G	-0.0164	0.3971	-0.0082	0.7869
rs192826641:46036366:G:A	17	46036366	0.00308227	0.763455	0	G	A	-0.1672	0.3988	-0.1712	0.5812
rs146192866:46067982:A:C	17	46067982	0.0136234	0.888883	0	A	C	0.0688	0.3998	0.0668	0.6039
rs4793688:45948412:C:T	17	45948412	0.181329	0.958459	0	C	T	0.0206	0.4	0.0168	0.6608
rs199905768:45993959:C:A	17	45993959	0.023	0.505411	0	C	A	0.072	0.4009	-0.2056	0.1296
17:46057131:C:T	17	46057131	0.001	0.711523	0	C	T	-0.2991	0.401	-0.2116	0.697
17:46004894:T:C	17	46004894	0.014788	0.955446	0	T	C	-0.0664	0.4011	-0.0771	0.5434
rs11079803:46019901:G:A	17	46019901	0.502025	0.997541	0	G	A	-0.0156	0.4012	-0.0131	0.6541
rs62064915:46129074:C:G	17	46129074	0.002	0.805329	0	C	G	-0.1777	0.4013	0.6222	0.05186
rs139226501:46001087:G:C	17	46001087	0.014788	0.955446	0	G	C	0.0663	0.4014	0.0771	0.5434
rs9895863:46007029:A:G	17	46007029	0.470567	0.999541	0	A	G	0.0155	0.4029	0.0084	0.7738
chr17_46052883_A_G	17	46052883	0.0613071	1	1	G	A	-0.0326	0.4032	-0.0291	0.6385
17:46061603:G:A	17	46061603	0.001	0.426206	0	G	A	0.2638	0.4036	-0.0056	0.9906
rs9903223:46008257:C:G	17	46008257	0.470567	1	0	C	G	0.0155	0.404	0.0088	0.7634
17:46003344:G:A	17	46003344	0.002	0.501215	0	G	A	0.1911	0.4042	0.1539	0.6646
rs4794333:46045495:T:C	17	46045495	0.389316	0.993	0	T	C	-0.0158	0.4042	0.0186	0.5337
rs141856390:45997191:CTTT:C	17	45997191	0.840494	0.878165	0	CTTT	C	-0.0224	0.405	0.0014	0.9741
rs117180213:46070227:C:A	17	46070227	0.0131645	0.955952	0	C	A	0.0694	0.4081	0.058	0.6617
rs10491183:46122125:G:T	17	46122125	0.0805886	0.995623	0	G	T	0.028	0.4082	0.0802	0.1328
rs76001670:46121875:T:C	17	46121875	0.0805886	0.996082	0	T	C	-0.0279	0.4092	-0.0807	0.1304
rs184660340:46042941:T:G	17	46042941	0.000458864	0.921826	0	T	G	-0.3359	0.4098	0.9951	0.1242
rs35839416:46005792:A:ACT	17	46005792	0.470567	0.999541	0	A	ACT	0.0153	0.4101	0.0088	0.7638
rs79390440:46021853:C:T	17	46021853	0.0106234	0.878282	0	C	T	0.0795	0.4108	-0.1349	0.3807
rs9903963:46121228:G:T	17	46121228	0.0805886	0.996082	0	G	T	0.0278	0.4108	0.0813	0.1278
17:46146923:C:T	17	46146923	0.00462341	0.895645	0	C	T	-0.111	0.4109	0.4495	0.04848
rs2597169	17	46034091	0.366601	1	1	A	G	0.0158	0.411	0.027	0.3711
rs36124074:46003859:T:G	17	46003859	0.470567	0.999	0	T	G	0.0152	0.4125	0.0094	0.7475
rs67194241:46003889:C:G	17	46003889	0.470567	0.999	0	C	G	0.0152	0.4125	0.0094	0.7477
rs77255138:45972417:T:G	17	45972417	0.49074	0.792753	0	T	G	-0.0169	0.4127	0.0062	0.8473
17:46153942:A:G	17	46153942	0.00408227	0.695497	0	A	G	-0.1417	0.4127	-0.1832	0.5007
rs60118365:46095001:AAAGAGG:A	17	46095001	0.807753	0.998	0	AAAGAGG	A	0.0192	0.413	0.0707	0.05396
rs10491182:46120767:T:C	17	46120767	0.0805886	0.997082	0	T	C	-0.0276	0.4134	-0.0815	0.1268
rs12452399:46120533:C:T	17	46120533	0.0805886	0.997082	0	C	T	0.0276	0.4142	0.0815	0.1266
rs12939739:46003188:A:G	17	46003188	0.470567	0.998541	0	A	G	0.0151	0.4144	0.0099	0.7354
rs147779202:46053640:G:A	17	46053640	0.0115411	0.355152	0	G	A	-0.1266	0.4146	-0.2686	0.2743
rs75063958:46057674:G:A	17	46057674	0.0613071	1	0	G	A	-0.0317	0.4159	-0.0292	0.6375
rs145428835:46119631:G:T	17	46119631	0.0805886	0.997082	0	G	T	0.0275	0.4159	0.0816	0.1261
rs11079805:46118666:A:G	17	46118666	0.0805886	0.997541	0	A	G	-0.0274	0.4175	-0.0817	0.1255
rs192347894:46031318:G:C	17	46031318	0.006	0.991212	0	G	C	-0.0995	0.4179	0.0879	0.6401
rs1808209:46140291:C:T	17	46140291	0.833952	0.999	0	C	T	0.0201	0.4182	0.0072	0.853
rs8066893:46009812:A:G	17	46009812	0.470567	1	0	A	G	0.015	0.4184	0.0099	0.7353
chr17_46064919_C_T	17	46064919	0.0213291	1	1	C	T	0.0534	0.4186	-0.0509	0.6274
rs8071003:46009888:T:C	17	46009888	0.470567	1	0	T	C	0.015	0.419	0.0099	0.7338
rs9900074:46124326:G:C	17	46124326	0.0805886	0.999459	0	G	C	0.0272	0.4194	0.0739	0.1651
rs115228368:46117740:T:C	17	46117740	0.0805886	0.997541	0	T	C	-0.0273	0.4196	-0.0819	0.1249
rs376874002:46117421:T:C	17	46117421	0.0805886	0.997541	0	T	C	-0.0273	0.4199	-0.0819	0.1247
rs188351757:46127735:G:A	17	46127735	0.004	0.913905	0	G	A	-0.1219	0.4201	-0.0459	0.8424
rs16949720:46027257:G:A	17	46027257	0.367601	0.994459	0	G	A	-0.0155	0.4202	-0.0264	0.3814
rs112789760:46078120:C:T	17	46078120	0.00754114	0.90481	0	C	T	0.0902	0.4204	0.0778	0.6602
rs118036504:46073854:T:C	17	46073854	0.0104589	0.979706	0	T	C	-0.0724	0.4205	0.0081	0.9542
rs1473117	17	46092539	0.127965	1	1	C	T	0.0218	0.4217	0.027	0.527
rs34064155:45969849:G:A	17	45969849	0.537399	0.996541	0	G	A	0.0149	0.422	-0.0018	0.9498
rs34606313:46010800:C:CAG	17	46010800	0.470567	1	0	C	CAG	-0.0149	0.4222	-0.0103	0.7253
rs4503839:46011307:C:G	17	46011307	0.470567	1	0	C	G	0.0149	0.4223	0.0103	0.7249
rs145362694:46089556:G:A	17	46089556	0.0102943	0.811276	0	G	A	-0.0802	0.4223	-0.0415	0.7955
17:46070234:T:C	17	46070234	0.000458864	0.798912	0	T	C	-0.2694	0.4226	0.268	0.5999
rs6503934	17	46013650	0.470567	1	1	T	C	0.0149	0.423	0.0103	0.7235
rs148189404:46077066:G:C	17	46077066	0.00654114	0.818468	0	G	C	0.0987	0.4234	-0.1722	0.3658
rs77225910:46115528:T:C	17	46115528	0.0805886	0.998541	0	T	C	-0.027	0.4235	-0.0821	0.1236
rs2002136:46022889:C:T	17	46022889	0.378601	0.994541	0	C	T	-0.0153	0.4236	-0.0132	0.661
rs191768236:46152355:C:G	17	46152355	0.000458864	0.684779	0	C	G	0.3651	0.4238	-0.2996	0.6681
rs5820673:45970746:G:GA	17	45970746	0.439576	0.960247	0	G	GA	-0.0152	0.4249	0.0025	0.9331
chr17_46054107_A_C	17	46054107	0.00783546	1	1	A	C	0.086	0.4251	0.4116	0.0176
rs1043603:46059110:C:T	17	46059110	0.0312468	0.977	0	C	T	-0.0419	0.4252	0.084	0.31
rs61665404:46031320:C:A	17	46031320	0.366601	0.998	0	C	A	-0.0153	0.4253	-0.0271	0.3686
rs17617053	17	46050669	0.0872468	1	1	T	C	0.0262	0.4265	-0.0749	0.1482
rs188120206:46053634:T:C	17	46053634	0.000458864	0.507025	0	T	C	0.4726	0.4269	0.1095	0.9108
rs115217454:46107225:T:C	17	46107225	0.0805886	0.999	0	T	C	-0.0267	0.4285	-0.0825	0.1218
rs35091825:46109428:T:C	17	46109428	0.0805886	1	0	T	C	-0.0267	0.429	-0.0827	0.121
chr17_46110313_CTT_INDEL	17	46110312	0.0805886	1	1	CCTT	C	-0.0267	0.4291	-0.0826	0.1211
rs12601827:46016613:A:G	17	46016613	0.470567	1	0	A	G	0.0147	0.4294	0.0106	0.7154
rs7219107:45968591:G:A	17	45968591	0.174731	0.990541	0	G	A	-0.0193	0.4299	0.0325	0.3991
rs11079801:45997076:G:C	17	45997076	0.473108	0.996459	0	G	C	-0.0146	0.4305	-0.0043	0.8828
rs143941133:46128198:C:T	17	46128198	0.001	0.829415	0	C	T	-0.2795	0.4307	0.8296	0.1387
rs60736523:46117951:C:T	17	46117951	0.00254114	0.81494	0	C	T	0.1601	0.4312	0.2792	0.3795
17:46079573:CAATAAAATAA:CAATAAAATAAAATAA	17	46079573	0.101177	0.966541	0	CAATAAAATAA	CAATAAAATAAAATAA	-0.0242	0.4314	0.0018	0.9707
rs138514758:46117481:T:C	17	46117481	0.0805886	0.997541	0	T	C	-0.0266	0.4316	-0.0821	0.1235
rs2325751:46017801:T:G	17	46017801	0.471025	0.998541	0	T	G	0.0146	0.4318	0.0105	0.7193
rs11652185:46016906:C:T	17	46016906	0.471025	1	0	C	T	-0.0146	0.432	-0.0098	0.736
rs13353189:45969605:G:A	17	45969605	0.537399	0.996541	0	G	A	0.0145	0.433	-0.0021	0.9433
rs368919036:45985952:C:G	17	45985952	0.00145886	0.670959	0	C	G	0.2064	0.434	0.0995	0.808
rs79347027:46038615:C:T	17	46038615	0.025212	0.996541	0	C	T	0.0455	0.4349	0.0886	0.3344
rs11656818:46103237:C:A	17	46103237	0.0811298	0.998459	0	C	A	0.0264	0.4349	0.0818	0.1251
rs28405789:46101837:G:A	17	46101837	0.0811298	0.997459	0	G	A	0.0261	0.439	0.0813	0.1274
rs117524159:46052322:G:C	17	46052322	0.00208227	0.977247	0	G	C	0.1573	0.4391	-0.1113	0.7239
rs3047638:46021566:CGT:C	17	46021566	0.312905	0.860082	0	CGT	C	0.0165	0.4394	0.0015	0.9636
rs56109359:46060011:A:G	17	46060011	0.0143291	0.919282	0	A	G	-0.0626	0.4402	-0.1007	0.4388
rs372248633:46004828:G:A	17	46004828	0.000458864	0.16412	0	G	A	-0.7443	0.4403	-0.455	0.7645
rs10853093	17	46153747	0.833952	1	1	G	A	0.019	0.4417	0.0094	0.8089
rs2158341:46158533:T:C	17	46158533	0.833952	1	0	T	C	-0.0189	0.444	-0.008	0.8366
rs11650615:46123698:C:G	17	46123698	0.278446	0.992	0	C	G	-0.0158	0.4448	0.0557	0.08818
rs9914123:46100871:C:T	17	46100871	0.0811298	0.996918	0	C	T	0.0258	0.4453	0.0809	0.1292
rs66754689:46107655:AACAC:A	17	46107655	0.187589	0.966753	0	AACAC	A	0.0181	0.4455	0.0344	0.3564
rs57782323:46043524:A:G	17	46043524	0.129506	0.994541	0	A	G	-0.0206	0.4456	-0.017	0.6891
rs187144300:45989095:C:T	17	45989095	0.00862341	0.832503	0	C	T	-0.0805	0.4459	0.0981	0.5524
rs117966871:46116753:G:A	17	46116753	0.00145886	0.658323	0	G	A	0.2702	0.4463	0.1884	0.7461
rs11650304:46035001:C:G	17	46035001	0.0771298	0.998	0	C	G	-0.0262	0.4466	-0.0797	0.1425
rs72823602	17	46139167	0.0384936	1	1	A	G	-0.0367	0.4491	0.0524	0.4903
rs7207225	17	45985414	0.367554	1	1	A	G	0.0145	0.4494	-0.0003	0.991
rs7209072	17	46110469	0.0805886	1	1	A	G	-0.0255	0.4507	-0.0817	0.125
rs189979717:45952522:C:T	17	45952522	0.00754114	0.863377	0	C	T	0.0902	0.4515	-0.1067	0.5734
rs139995038:46046551:T:C	17	46046551	0.001	0.883481	0	T	C	-0.2353	0.4515	-0.0177	0.9702
rs61165779:46022824:CT:C	17	46022824	0.00654114	0.869459	0	CT	C	0.0923	0.4556	-0.0976	0.6171
rs76733140:46075058:C:T	17	46075058	0.0618482	0.995	0	C	T	-0.029	0.457	-0.0301	0.627
rs113383373:45997267:A:G	17	45997267	0.001	0.583636	0	A	G	0.2299	0.4572	0.6612	0.1844
rs11651275:46098780:C:A	17	46098780	0.0811298	0.996377	0	C	A	0.0251	0.4583	0.0802	0.1328
rs184615444:46073626:G:C	17	46073626	0.001	0.690731	0	G	C	0.2597	0.4586	0.1579	0.7788
17:46040534:C:G	17	46040534	0.004	0.715282	0	C	G	-0.1248	0.4592	-0.4525	0.08531
rs11650043:46027852:G:A	17	46027852	0.0775886	0.995918	0	G	A	0.0254	0.4602	0.08	0.1409
rs180703179:46078825:C:T	17	46078825	0.000458864	0.534601	0	C	T	-0.4845	0.4603	-0.1628	0.8825
rs17679445:46022065:G:A	17	46022065	0.0742943	0.999	0	G	A	0.0259	0.4607	0.0793	0.1515
rs144528439:46060949:C:T	17	46060949	0.00445886	0.719965	0	C	T	-0.1212	0.4612	0.3587	0.1727
rs5820679:46097404:GT:GTT	17	46097404	0.0128355	0.902272	0	GT	GTT	0.0664	0.4623	-0.004	0.9783
rs11448169:46049459:G:GA	17	46049459	0.695658	0.850377	0	G	GA	-0.016	0.4624	0.0624	0.06819
rs17617360:46077099:A:G	17	46077099	0.0786709	0.992459	0	A	G	-0.0251	0.4628	-0.0777	0.1508
rs6847:46147807:T:A	17	46147807	0.236801	0.999	0	T	A	0.0157	0.4637	0.0501	0.1382
rs41429650:46097878:G:A	17	46097878	0.0811298	0.995377	0	G	A	0.0247	0.4639	0.0799	0.1342
rs9890096:46097083:T:C	17	46097083	0.0811298	0.995377	0	T	C	-0.0247	0.464	-0.0811	0.1283
17:46115122:A:AG	17	46115122	0.995541	0.809857	0	A	AG	0.1081	0.4642	0.1824	0.4371
rs76515908:46141923:A:T	17	46141923	0.009	0.919494	0	A	T	-0.0757	0.4645	0.2651	0.09414
rs9899461	17	46129353	0.23626	1	1	C	T	0.0157	0.465	0.0535	0.1137
rs2229358	17	45994154	0.46919	1	1	G	A	-0.0135	0.468	-0.0041	0.8895
rs373778488:46026682:TCAACC:T	17	46026682	0.0780475	0.995377	0	TCAACC	T	0.0248	0.4695	0.0783	0.1483
rs6503897:45957049:A:G	17	45957049	0.819048	0.998459	0	A	G	0.0173	0.4707	0.0135	0.7195
rs368005021:45972247:AAGG:A	17	45972247	0.00862341	0.903294	0	AAGG	A	-0.0753	0.4716	0.0631	0.7005
rs8079333:45972272:A:C	17	45972272	0.625446	0.976623	0	A	C	-0.0138	0.4729	-0.0039	0.8975
rs181954471:45973074:A:G	17	45973074	0.00662341	0.971377	0	A	G	-0.0785	0.473	-0.0836	0.6213
rs56686472:46078404:A:G	17	46078404	0.00345886	0.481196	0	A	G	-0.1467	0.4741	0.1424	0.6533
rs2285863:46125978:C:G	17	46125978	0.23626	1	0	C	G	-0.0153	0.4759	-0.0523	0.1221
rs9899275	17	46129315	0.23626	1	1	C	T	0.0153	0.4759	0.0513	0.1295
rs1476579:46070431:C:T	17	46070431	0.014788	0.960247	0	C	T	0.0558	0.476	0.1004	0.4243
rs2325714:45953839:T:G	17	45953839	0.819048	0.995459	0	T	G	0.0171	0.477	0.0142	0.7077
rs5820682:46150487:T:TA	17	46150487	0.237801	0.994459	0	T	TA	-0.0153	0.4776	-0.0502	0.1381
rs12936731	17	46128359	0.23626	1	1	G	C	0.0152	0.4787	0.0522	0.1231
rs60312877:46134236:A:ACT	17	46134236	0.23626	1	0	A	ACT	-0.0151	0.4816	-0.0517	0.1267
rs141608552:46072680:A:G	17	46072680	0.0607659	0.994459	0	A	G	0.0276	0.4817	0.0223	0.7205
rs12450620:46130254:G:T	17	46130254	0.23626	1	0	G	T	0.0151	0.4826	0.0521	0.1233
rs113522836:46035443:C:G	17	46035443	0.0110823	0.96474	0	C	G	0.0612	0.4834	0.2179	0.1019
17:45981624:G:T	17	45981624	0.00962341	0.633832	0	G	T	-0.0854	0.4836	0.1155	0.5465
rs12939572:45981278:T:C	17	45981278	0.367095	0.998541	0	T	C	0.0134	0.4837	0.0006	0.9847
rs71366805:45982079:G:GT	17	45982079	0.367095	0.998541	0	G	GT	0.0134	0.4855	0.0007	0.9813
rs192073556:46130995:G:C	17	46130995	0.00545886	0.955706	0	G	C	0.0923	0.4855	0.1176	0.5875
rs7212202:46132723:G:C	17	46132723	0.23626	1	0	G	C	0.0149	0.4864	0.0519	0.125
rs34750858:46132937:T:A	17	46132937	0.23626	1	0	T	A	0.0149	0.4868	0.0519	0.1251
rs7217496:46154202:A:G	17	46154202	0.236801	0.997	0	A	G	-0.0149	0.4881	-0.0501	0.1385
rs10711107:46132939:TG:T	17	46132939	0.23626	0.999	0	TG	T	0.0149	0.4882	0.0517	0.1264
rs875066:46139732:T:G	17	46139732	0.23626	1	0	T	G	-0.0148	0.4902	-0.0511	0.1307
17:46139023:C:T	17	46139023	0.00408227	0.895307	0	C	T	0.1076	0.491	0.3055	0.2179
rs71298798:46142656:T:TTAACA	17	46142656	0.23626	0.999541	0	T	TTAACA	-0.0148	0.4922	-0.0502	0.1376
rs11303505:46065827:CA:C	17	46065827	0.70107	0.953706	0	CA	C	-0.0143	0.4923	0.0633	0.05332
rs16949427:45992916:C:T	17	45992916	0.107718	0.978835	0	C	T	-0.0203	0.4928	0.0031	0.9479
rs875065:46139569:C:T	17	46139569	0.23626	0.999459	0	C	T	0.0147	0.4929	0.0513	0.1293
rs2905856:46085885:T:A	17	46085885	0.00145886	0.988048	0	T	A	0.1683	0.4948	0.1124	0.7751
rs188180804:46031116:G:A	17	46031116	0.000458864	0.523679	0	G	A	0.3149	0.4962	-0.3527	0.608
17:46100770:C:T	17	46100770	0.0153291	0.972788	0	C	T	0.0521	0.4965	0.1162	0.344
rs188634854:46047735:A:G	17	46047735	0.00354114	0.87619	0	A	G	0.1181	0.4966	-0.2808	0.3044
17:46107248:C:T	17	46107248	0.000541136	0.337679	0	C	T	0.5359	0.4966	0.6096	0.6214
rs148964257:46062070:C:T	17	46062070	0.000917728	0.556687	0	C	T	0.2386	0.4971	0.7773	0.1537
rs4369725:46006687:T:C	17	46006687	0.46819	0.999541	0	T	C	0.0126	0.4978	0.0089	0.76
rs149637911:46073645:T:C	17	46073645	0.0102943	0.819228	0	T	C	0.0665	0.4978	0.0443	0.7781
rs147473894:46074199:G:A	17	46074199	0.00254114	0.929753	0	G	A	-0.1278	0.4981	-0.1716	0.563
rs9899097:45989046:T:C	17	45989046	0.367554	0.997	0	T	C	0.013	0.4985	-0.0013	0.965
rs146868363:46017062:G:C	17	46017062	0.0257532	0.986082	0	G	C	0.0394	0.4987	0.0742	0.4187
rs375834257:46006255:T:C	17	46006255	0.00508227	0.955975	0	T	C	0.0935	0.4992	0.0402	0.8503
rs141803094:46006688:T:C	17	46006688	0.00508227	0.955975	0	T	C	0.0935	0.4992	0.0401	0.8505
17:46150195:T:C	17	46150195	0.000541136	0.336467	0	T	C	-0.5418	0.4993	-0.6589	0.5977
rs58203448:46141276:C:T	17	46141276	0.23626	1	0	C	T	0.0145	0.4998	0.0511	0.1312
rs201187383:45978813:G:GT	17	45978813	0.00345886	0.732428	0	G	GT	-0.1264	0.5002	-0.2334	0.4372
rs2051821:46143515:T:C	17	46143515	0.23626	1	0	T	C	-0.0144	0.5035	-0.0511	0.1311
rs33978890:46096914:G:GA	17	46096914	0.421766	0.767	0	G	GA	-0.0142	0.5044	-0.031	0.3549
17:46124393:G:GT	17	46124393	0.001	0.829991	0	G	GT	0.2678	0.5045	0.1244	0.8409
rs71377324:45981357:A:G	17	45981357	0.367095	0.998541	0	A	G	0.0128	0.5052	0.0001	0.9986
17:46111543:C:T	17	46111543	0.000541136	0.495994	0	C	T	0.4503	0.5053	-1.1068	0.3004
rs79541578:46102728:G:A	17	46102728	0.208104	0.989459	0	G	A	0.0153	0.5069	-0.1079	0.003007
17:46110861:G:A	17	46110861	0.001	0.907753	0	G	A	-0.1977	0.5073	-0.7732	0.09662
rs11079806	17	46142680	0.23626	1	1	G	A	0.0142	0.5079	0.0496	0.1431
rs2285860:46048412:G:T	17	46048412	0.128506	0.992541	0	G	T	0.0179	0.5084	0.0197	0.6456
rs2318118	17	46007232	0.46819	1	1	G	A	-0.0122	0.509	-0.0102	0.7271
rs56116380:46089875:C:G	17	46089875	0.00145886	0.987671	0	C	G	-0.1618	0.5118	-0.1054	0.7887
rs4794331:46040395:T:G	17	46040395	0.206035	0.997541	0	T	G	0.015	0.5122	0.0393	0.2718
rs151187155:46119320:TA:T	17	46119320	0.00145886	0.89236	0	TA	T	0.1884	0.5123	0.0082	0.9857
rs58624511:46158908:C:G	17	46158908	0.23626	1	0	C	G	-0.014	0.5131	-0.0512	0.1305
rs8078125:46145709:T:G	17	46145709	0.23626	1	0	T	G	-0.014	0.5141	-0.0511	0.1311
rs11651097:46147039:T:C	17	46147039	0.23626	1	0	T	C	-0.014	0.5145	-0.0511	0.1309
rs373303332:46127819:C:T	17	46127819	0.000458864	0.656925	0	C	T	-0.271	0.5147	0.6848	0.2733
rs9747001:46154669:G:A	17	46154669	0.23626	1	0	G	A	0.014	0.5149	0.0512	0.1298
rs58595405:46149404:C:G	17	46149404	0.23626	1	0	C	G	-0.014	0.5151	-0.0511	0.1306
rs11655407:46151046:A:G	17	46151046	0.23626	1	0	A	G	-0.014	0.5151	-0.0512	0.1302
rs2240122:46152559:C:A	17	46152559	0.23626	1	0	C	A	0.014	0.5151	0.0512	0.1299
rs35202025:46152717:A:G	17	46152717	0.23626	1	0	A	G	-0.014	0.5151	-0.0512	0.1298
rs7224014:46150861:T:G	17	46150861	0.23626	1	0	T	G	-0.014	0.5152	-0.0512	0.1302
rs146011627:46152715:T:TC	17	46152715	0.23626	1	0	T	TC	-0.014	0.5152	-0.0512	0.1298
rs59493350	17	46143800	0.0378355	1	1	G	A	-0.0315	0.5165	0.1041	0.1679
rs35261895:46053905:A:G	17	46053905	0.005	0.91713	0	A	G	0.089	0.5176	-0.3948	0.07591
rs3794769:46131394:G:A	17	46131394	0.000458864	0.483987	0	G	A	0.2876	0.5177	-0.4555	0.4943
rs146179117:46155814:A:C	17	46155814	0.00508227	0.931667	0	A	C	0.0905	0.52	0.1724	0.4338
rs11649919:46146820:A:G	17	46146820	0.23626	1	0	A	G	-0.0138	0.5213	-0.0522	0.123
rs143611718:46030560:C:T	17	46030560	0.00354114	0.957377	0	C	T	0.0983	0.5218	-0.0199	0.9339
rs149476176:45951250:CTCT:C	17	45951250	0.214152	0.975165	0	CTCT	C	-0.0146	0.5219	0.1055	0.003214
rs200774151:46141804:A:AT	17	46141804	0.00145886	0.693003	0	A	AT	-0.228	0.5227	-0.2064	0.7234
rs3834971:46124994:ACCGCCAACGTT:A	17	46124994	0.155554	0.975165	0	ACCGCCAACGTT	A	-0.0165	0.523	0.0903	0.02608
rs72840237:45998050:G:A	17	45998050	0.46919	0.996541	0	G	A	-0.0119	0.5231	-0.0066	0.8212
rs1130932:46002744:G:T	17	46002744	0.46819	0.999	0	G	T	-0.0118	0.5244	-0.0106	0.7164
rs12949879:46158050:T:C	17	46158050	0.23626	1	0	T	C	-0.0137	0.5244	-0.0521	0.1233
rs79334728:46120643:C:G	17	46120643	0.0115411	0.950952	0	C	G	0.0554	0.5248	0.2043	0.1249
rs117588849:46041164:G:T	17	46041164	0.00545886	0.587962	0	G	T	0.0993	0.5251	-0.2914	0.2307
rs35083105:46156351:CA:C	17	46156351	0.23626	1	0	CA	C	-0.0136	0.5252	-0.0522	0.123
rs11649995:46146955:A:G	17	46146955	0.23626	1	0	A	G	-0.0136	0.5254	-0.0521	0.1238
rs76984226:46155393:C:T	17	46155393	0.003	0.726079	0	C	T	-0.119	0.5256	-0.1229	0.6735
17:46065707:CTGTAG:C	17	46065707	0.00591773	0.93387	0	CTGTAG	C	0.0722	0.5267	0.0515	0.767
rs111730022:46074346:TTTAA:T	17	46074346	0.335671	0.66126	0	TTTAA	T	0.0164	0.5268	0.044	0.2852
rs34593510:46001535:G:A	17	46001535	0.46819	0.999	0	G	A	-0.0117	0.5272	-0.0106	0.7177
rs1468270	17	46125191	0.231177	1	1	C	T	0.0136	0.5304	0.0459	0.1782
rs145489940:46039945:T:C	17	46039945	0.00408227	0.846386	0	T	C	0.0974	0.5306	0.2392	0.3361
rs11659126:46010108:G:A	17	46010108	0.46819	1	0	G	A	-0.0116	0.5313	-0.0112	0.702
rs188102389:46072064:C:T	17	46072064	0.00208227	0.974494	0	C	T	0.1306	0.5313	-0.0903	0.7795
rs67582828	17	46153028	0.53194	1	1	C	CA	0.0116	0.5328	-0.0595	0.04166
rs11655068:46014184:G:A	17	46014184	0.46819	1	0	G	A	-0.0116	0.5331	-0.0114	0.6957
rs11652827:46012505:C:T	17	46012505	0.46819	1	0	C	T	-0.0115	0.5337	-0.0113	0.6972
rs3764396	17	46015969	0.468649	1	1	T	C	0.0115	0.5357	0.0123	0.6725
17:46072655:C:T	17	46072655	0.001	0.380788	0	C	T	0.3882	0.5358	-0.3632	0.7181
rs17617076	17	46051273	0.026212	1	1	G	C	0.0357	0.5363	0.1008	0.2674
17:46147348:G:A	17	46147348	0.000541136	0.459472	0	G	A	-0.369	0.5364	0.4884	0.6013
rs143694175:45973428:C:T	17	45973428	0.00145886	0.819013	0	C	T	0.2116	0.538	-0.7077	0.1951
rs186888642:46041393:T:C	17	46041393	0.001	0.896845	0	T	C	-0.1796	0.5409	0.1881	0.6754
rs199634607:46024900:C:CT	17	46024900	0.202494	0.951082	0	C	CT	-0.0144	0.5411	-0.0533	0.1488
rs11655352:46014128:C:G	17	46014128	0.468649	0.999	0	C	G	0.0113	0.5422	0.0105	0.719
rs7406338:46045484:C:G	17	46045484	0.728316	0.993377	0	C	G	-0.0126	0.5422	0.0508	0.1193
rs3826396:46032804:C:A	17	46032804	0.206494	0.996459	0	C	A	-0.0139	0.5436	-0.0418	0.2427
rs113352778:46099243:C:T	17	46099243	0.00145886	0.862633	0	C	T	0.1842	0.5448	-0.201	0.6774
rs55919254:46146663:T:A	17	46146663	0.255801	0.93413	0	T	A	0.0131	0.5449	0.0409	0.2298
rs72823519:46061885:G:T	17	46061885	0.129048	1	0	G	T	0.0163	0.5453	0.024	0.5726
17:46074132:G:GCAGCC	17	46074132	0.003	0.428583	0	G	GCAGCC	0.1583	0.5461	-0.5207	0.2052
rs11079799:45956073:A:G	17	45956073	0.803377	0.998459	0	A	G	0.0139	0.5482	0.0352	0.3322
17:46055435:G:GTT	17	46055435	0.494775	0.778377	0	G	GTT	0.0125	0.5483	0.0552	0.09165
rs112153522:46054810:G:A	17	46054810	0.129048	1	0	G	A	0.0161	0.5515	0.0242	0.57
rs190195637:46059917:C:T	17	46059917	0.00545886	0.931411	0	C	T	0.0776	0.5521	0.039	0.8548
rs111639853:46060959:C:T	17	46060959	0.0216234	0.962364	0	C	T	-0.0381	0.5524	-0.0404	0.6856
rs142592709:45997252:T:C	17	45997252	0.00145886	0.312187	0	T	C	-0.222	0.5525	0.6672	0.2573
17:46110826:C:G	17	46110826	0.001	0.622215	0	C	G	-0.2471	0.5525	-0.1562	0.8192
exm1332982	17	46023295	0.00191773	1	1	C	G	0.1528	0.5526	-0.4893	0.2493
rs113273062:45993386:G:A	17	45993386	0.00445886	0.936035	0	G	A	-0.0818	0.5544	-0.0594	0.7791
rs55982711:46065402:G:A	17	46065402	0.127048	0.990835	0	G	A	0.0161	0.5549	0.0233	0.5885
rs200861583:45954614:G:GT	17	45954614	0.001	0.320171	0	G	GT	-0.4266	0.5564	-1.3555	0.2096
rs75919935:46146281:C:A	17	46146281	0.000458864	0.43995	0	C	A	-0.3057	0.5564	0.3415	0.6983
rs140713446:46124685:G:C	17	46124685	0.001	0.625108	0	G	C	0.2581	0.5565	-0.1053	0.8744
rs112104290:46063174:T:C	17	46063174	0.129048	1	0	T	C	-0.0159	0.5569	-0.0256	0.5478
rs34428844:46030042:C:T	17	46030042	0.166082	1	0	C	T	-0.0145	0.5575	0.1188	0.002237
rs2597182:46062284:A:G	17	46062284	0.986247	0.997541	0	A	G	-0.0451	0.558	-0.2245	0.06212
rs2525089:46063524:A:G	17	46063524	0.986247	0.997541	0	A	G	-0.0451	0.558	-0.2245	0.06217
rs17616799	17	46039553	0.126965	1	1	A	G	-0.0159	0.5592	-0.0184	0.6678
rs143857715:46074845:T:TGGGAGCGGGCTC	17	46074845	0.127506	0.995	0	T	TGGGAGCGGGCTC	-0.0158	0.5621	-0.0234	0.586
rs2597176:46059701:T:C	17	46059701	0.986247	0.997541	0	T	C	-0.0446	0.5631	-0.2254	0.06115
rs146338823:45962589:C:T	17	45962589	0.00554114	0.929377	0	C	T	0.0708	0.5637	0.1196	0.5347
rs149285056:46092703:C:T	17	46092703	0.00354114	0.599	0	C	T	-0.1255	0.5671	0.7062	0.04056
rs67498287:46088499:CT:C	17	46088499	0.361611	0.948835	0	CT	C	-0.0113	0.568	0.0563	0.07031
rs75221366:46128027:G:A	17	46128027	0.00245886	0.684271	0	G	A	0.1409	0.5688	-0.0791	0.8371
rs143292598:46090310:C:T	17	46090310	0.00308227	0.588461	0	C	T	0.1239	0.5692	-0.1436	0.6749
rs73321628:45977632:A:G	17	45977632	0.00191773	0.959848	0	A	G	-0.1329	0.5706	-0.0457	0.9032
rs55698947:46086921:T:C	17	46086921	0.0288702	0.978247	0	T	C	-0.031	0.5706	-0.0696	0.4271
rs2905845:46046780:G:T	17	46046780	0.728316	0.999	0	G	T	0.0117	0.5725	-0.0527	0.1053
rs73321625:45977502:A:T	17	45977502	0.00191773	0.960389	0	A	T	-0.1322	0.5729	-0.0471	0.9005
rs184639988:46078582:A:G	17	46078582	0.00408227	0.865927	0	A	G	0.0878	0.573	0.2254	0.3656
rs4793741:46062560:A:G	17	46062560	0.11487	0.999541	0	A	G	0.0163	0.574	-0.0371	0.4131
rs4794224	17	45957463	0.803377	1	1	T	C	0.013	0.5741	0.0365	0.3142
rs56402159:46031322:T:G	17	46031322	0.126965	0.997459	0	T	G	-0.0153	0.5745	-0.0181	0.6739
rs17679651:46087426:T:C	17	46087426	0.00145886	0.894592	0	T	C	0.1494	0.5761	-0.6499	0.1352
rs11545723:46035180:G:A	17	46035180	0.166082	0.999459	0	G	A	-0.0138	0.5766	0.1201	0.002
17:46044308:C:CTTTTTTCTTTTT	17	46044308	0.518494	0.842294	0	C	CTTTTTTCTTTTT	0.0111	0.5784	-0.0683	0.03052
rs143839409:46152093:A:T	17	46152093	0.00762341	0.883823	0	A	T	-0.0639	0.5793	-0.3109	0.08689
rs117449497:46031105:G:T	17	46031105	0.00662341	0.971294	0	G	T	0.0606	0.5794	0.0878	0.6041
rs2597168:46048165:T:C	17	46048165	0.728316	1	0	T	C	-0.0113	0.5826	0.0531	0.1026
rs2255697:46048168:C:T	17	46048168	0.728316	1	0	C	T	0.0113	0.5826	-0.0531	0.1026
rs76950846:46102153:G:A	17	46102153	0.198857	0.990918	0	G	A	0.0128	0.5838	-0.1091	0.003152
rs57768342:46028625:G:A	17	46028625	0.206576	0.994	0	G	A	-0.0125	0.5856	-0.0432	0.2274
rs77563750:46072710:G:A	17	46072710	0.0776709	0.999459	0	G	A	0.0186	0.587	0.0832	0.1244
17:46154794:TGTTTTTTTTTTTGTTTTTTTTG:T	17	46154794	0.556693	0.952165	0	TGTTTTTTTTTTTGTTTTTTTTG	T	0.0103	0.5884	-0.0555	0.065
rs4793734	17	46034105	0.165541	1	1	T	C	0.0134	0.5888	-0.1195	0.002121
rs75717806:46015108:G:A	17	46015108	0.200494	0.999541	0	G	A	-0.0123	0.592	-0.0476	0.1876
rs3764398:46018117:G:A	17	46018117	0.200494	0.999	0	G	A	-0.0123	0.5935	-0.0476	0.1875
rs72833491:45981004:A:G	17	45981004	0.208658	0.991541	0	A	G	0.0121	0.5937	0.0478	0.1796
rs75058772:46093824:T:A	17	46093824	0.001	0.688589	0	T	A	0.2347	0.5938	0.4856	0.49
rs80076843:46149737:T:C	17	46149737	0.0233291	0.994	0	T	C	0.0324	0.5952	-0.0492	0.6111
rs56771634:46078406:G:A	17	46078406	0.003	0.498031	0	G	A	0.1089	0.5967	-0.0973	0.76
rs78560750:46104960:G:C	17	46104960	0.001	0.67813	0	G	C	0.2395	0.5975	0.5204	0.471
rs184687613:45955104:G:A	17	45955104	0.000458864	0.908472	0	G	A	-0.2122	0.5977	0.3008	0.6043
rs117197317:45973685:G:T	17	45973685	0.0301645	0.951554	0	G	T	-0.0284	0.5989	0.0925	0.2772
chr17_46092738_A_G	17	46092738	0.0327057	1	1	G	A	-0.0268	0.5999	0.0542	0.5007
rs8066225:46142858:T:G	17	46142858	0.001	0.985212	0	T	G	-0.1725	0.5999	-0.2151	0.6771
rs7216411:46088944:C:T	17	46088944	0.81013	0.994459	0	C	T	0.0123	0.6003	0.0838	0.0228
rs149811876:46055419:A:AG	17	46055419	0.11487	0.999	0	A	AG	0.0152	0.6009	-0.0389	0.3911
rs143499120:46136952:C:T	17	46136952	0.00854114	0.780177	0	C	T	0.057	0.6012	-0.0759	0.6563
17:46158314:ATATATATATATAT:A	17	46158314	0.00754114	0.529221	0	ATATATATATATAT	A	0.0688	0.6028	-0.286	0.1572
rs111514452:46037570:C:T	17	46037570	0.00445886	0.942199	0	C	T	-0.0724	0.6029	-0.0536	0.8013
rs72823527:46098810:G:T	17	46098810	0.201399	0.997541	0	G	T	0.012	0.6044	-0.1054	0.00406
rs200993688:46158347:TATATATATAA:T	17	46158347	0.131801	0.997	0	TATATATATAA	T	-0.0141	0.6052	0.0411	0.339
rs2325747:45974285:C:T	17	45974285	0.458601	0.997082	0	C	T	-0.0096	0.6055	0.0027	0.926
rs3764394:45976824:A:G	17	45976824	0.365177	0.997541	0	A	G	0.0099	0.6055	0.0021	0.9442
rs72823530	17	46109371	0.201399	1	1	G	A	0.012	0.6059	-0.1045	0.004306
rs11653445:45978787:A:G	17	45978787	0.365177	0.997541	0	A	G	0.0099	0.6061	0.0021	0.9456
rs112296021:46101460:G:A	17	46101460	0.201399	0.998	0	G	A	0.012	0.6064	-0.1045	0.004364
rs148741395:46156541:C:T	17	46156541	0.007	0.883433	0	C	T	0.0613	0.6094	0.0596	0.756
rs115925051:46144005:C:A	17	46144005	0.00345886	0.664687	0	C	A	-0.1018	0.6102	0.592	0.0594
rs199825277:45973697:C:G	17	45973697	0.00945886	0.884399	0	C	G	-0.053	0.6117	0.2384	0.1358
rs10459927:45981536:T:C	17	45981536	0.458601	0.998541	0	T	C	0.0094	0.6119	-0.0024	0.9337
rs17617010:46049533:C:T	17	46049533	0.11487	0.999	0	C	T	-0.0147	0.6124	0.0373	0.411
rs61396871:46028160:C:T	17	46028160	0.126965	0.997459	0	C	T	0.0138	0.6125	0.0186	0.665
chr17_46048592_A_G	17	46048592	0.728775	1	1	A	G	-0.0104	0.6129	0.0523	0.1082
rs185681588:45977274:G:A	17	45977274	0.00554114	0.918377	0	G	A	0.0612	0.6137	0.1424	0.4552
rs187959271:46115222:C:A	17	46115222	0.0787057	0.970788	0	C	A	-0.0177	0.6144	0.0716	0.1939
rs2255815:46049126:A:G	17	46049126	0.729234	0.998541	0	A	G	-0.0104	0.6149	0.0536	0.09983
rs58460102:46041125:C:CT	17	46041125	0.47507	0.932212	0	C	CT	0.0095	0.6162	-0.08	0.007643
rs11658242:46153580:A:G	17	46153580	0.125718	1	0	A	G	0.0139	0.6173	-0.0653	0.1382
17:46045881:T:TTTTTG	17	46045881	0.00745886	0.922459	0	T	TTTTTG	-0.0567	0.6176	-0.0181	0.9197
rs188353596:46078602:C:T	17	46078602	0.00691773	0.967048	0	C	T	-0.0542	0.6182	0.0194	0.9074
rs12103808:46157596:A:G	17	46157596	0.125718	1	0	A	G	0.0139	0.6186	-0.0654	0.1375
rs9905800:46149680:G:A	17	46149680	0.125718	1	0	G	A	-0.0139	0.6194	0.065	0.1398
rs2525084:46048157:A:G	17	46048157	0.728775	1	0	A	G	-0.0102	0.6217	0.0523	0.1083
rs2525085:46048858:C:G	17	46048858	0.728775	0.999541	0	C	G	-0.0102	0.6217	0.053	0.1038
17:46051895:GCA:G	17	46051895	0.00154114	0.606037	0	GCA	G	0.1631	0.6217	0.3257	0.5384
rs8073220:46145480:C:T	17	46145480	0.125718	0.999	0	C	T	-0.0137	0.6226	0.0649	0.1407
rs7209484:46143042:T:C	17	46143042	0.207658	0.994082	0	T	C	-0.0112	0.6248	-0.0747	0.03745
17:46117496:C:A	17	46117496	0.00554114	0.623389	0	C	A	0.0796	0.6254	0.313	0.2309
rs8065797:46126265:C:G	17	46126265	0.125177	1	0	C	G	0.0136	0.6254	-0.0637	0.1485
rs117166094:46110457:G:A	17	46110457	0.00445886	0.715886	0	G	A	0.0865	0.6259	0.1417	0.6216
rs9909922:46141844:T:C	17	46141844	0.125718	1	0	T	C	0.0136	0.6267	-0.0647	0.1416
rs188994597:46133570:A:G	17	46133570	0.00554114	0.911136	0	A	G	-0.0635	0.6271	-0.2781	0.1643
rs146204978:46022191:T:A	17	46022191	0.002	0.783677	0	T	A	0.1099	0.6276	-0.3679	0.2875
rs56216222:46107805:C:T	17	46107805	0.00145886	0.891399	0	C	T	0.1336	0.6276	-0.0443	0.9191
rs12950225	17	46145200	0.536857	1	1	A	G	-0.009	0.629	0.0636	0.02965
17:46011193:G:A	17	46011193	0.00154114	0.263709	0	G	A	-0.5032	0.6293	3.3073	0.02751
rs61521088:45966374:G:A	17	45966374	0.00191773	0.948437	0	G	A	0.1132	0.6304	0.0584	0.8772
rs113403571:46097524:A:G	17	46097524	0.201399	0.997541	0	A	G	-0.0111	0.6331	0.1043	0.004446
rs188750229:46081594:C:T	17	46081594	0.002	0.716304	0	C	T	0.0924	0.6337	-0.1593	0.5812
rs143851165:46061776:A:G	17	46061776	0.000917728	0.56238	0	A	G	-0.1711	0.6341	-0.8441	0.1281
17:46034457:C:T	17	46034457	0.001	0.39793	0	C	T	0.1292	0.6365	-0.1311	0.7486
rs150160489:46132532:C:CTAAAG	17	46132532	0.0228702	0.985706	0	C	CTAAAG	-0.0294	0.6371	0.0383	0.6987
rs11312722:46085758:CA:C	17	46085758	0.130082	0.853589	0	CA	C	-0.0139	0.6374	-0.0196	0.671
rs8067470	17	46128122	0.125177	1	1	A	G	0.0132	0.6374	-0.0654	0.1375
17:46099259:A:ATTTTTTTTTTT	17	46099259	0.341177	0.984918	0	A	ATTTTTTTTTTT	0.0092	0.6381	-0.0626	0.04218
rs143423898:46132564:AG:A	17	46132564	0.125177	1	0	AG	A	-0.0131	0.6383	0.065	0.14
rs2256020	17	46050635	0.192952	1	1	T	C	0.0109	0.6384	0.0604	0.09669
chr17_46124276_C_T	17	46124276	0.184693	1	1	C	T	0.0112	0.639	-0.1125	0.002828
rs2229370:46136751:G:C	17	46136751	0.0264114	0.980788	0	G	C	0.0265	0.6408	0.0577	0.525
rs186447258:45958095:C:T	17	45958095	0.00708227	0.820294	0	C	T	0.0562	0.6426	-0.1944	0.3014
rs72840233:45988950:G:A	17	45988950	0.207658	0.992082	0	G	A	-0.0106	0.6426	-0.0447	0.2102
rs4793732:46033854:C:A	17	46033854	0.299658	0.989	0	C	A	-0.0094	0.6427	0.0846	0.007676
rs117551632:45966567:G:A	17	45966567	0.0138355	0.915589	0	G	A	-0.0384	0.643	-0.0825	0.5339
rs62067380:46000406:T:C	17	46000406	0.136411	0.985918	0	T	C	-0.0126	0.6433	0.0079	0.8519
17:46137541:C:CG	17	46137541	0.0238702	0.978	0	C	CG	-0.0282	0.6436	0.0452	0.6395
rs2597162:46066049:A:C	17	46066049	0.733693	0.996082	0	A	C	-0.0096	0.644	0.0614	0.06045
17:46140905:A:AG	17	46140905	0.0264114	0.980788	0	A	AG	-0.0263	0.6448	-0.0495	0.5871
rs149111560:46071231:G:T	17	46071231	0.007	0.937775	0	G	T	0.0543	0.6457	-0.0205	0.9129
rs113962925:46044446:C:T	17	46044446	0.0991773	0.988541	0	C	T	0.0139	0.648	0.0087	0.8563
rs41280120:46114692:C:G	17	46114692	0.201399	0.998	0	C	G	-0.0105	0.6499	0.1052	0.00409
rs73985431:45962550:C:T	17	45962550	0.00191773	0.946272	0	C	T	0.1067	0.6503	0.0615	0.8707
rs74953446:46092187:C:T	17	46092187	0.0322468	0.996918	0	C	T	-0.0233	0.6503	0.0539	0.5044
rs200114569:46114572:C:G	17	46114572	0.00445886	0.951355	0	C	G	-0.0661	0.6507	0.4771	0.03711
rs73323378:46044912:A:C	17	46044912	0.11487	0.993459	0	A	C	0.0131	0.6524	-0.0362	0.426
rs28619991:45967080:C:A	17	45967080	0.00537659	0.904731	0	C	A	0.0598	0.6538	0.2538	0.229
chr17_46091444_C_T	17	46091444	0.367801	1	1	T	C	0.0085	0.6543	-0.0763	0.01045
17:45973958:C:T	17	45973958	0.000458864	0.454563	0	C	T	-0.3621	0.6556	0.273	0.8378
rs7216504:46117341:G:A	17	46117341	0.201399	0.997	0	G	A	0.0104	0.656	-0.1048	0.004214
rs113187178:46117471:G:A	17	46117471	0.201399	0.997	0	G	A	0.0103	0.6563	-0.1048	0.004221
rs75129630:46092821:G:A	17	46092821	0.0322468	0.994835	0	G	A	-0.0227	0.659	0.0461	0.5687
rs60123006:45981919:G:A	17	45981919	0.167494	0.992541	0	G	A	0.0109	0.6599	0.0006	0.9869
rs11434235:46142854:G:GT	17	46142854	0.620212	0.778506	0	G	GT	-0.0095	0.6602	-0.0489	0.15
rs151187155:46119320:TA:AA	17	46119320	0.201399	0.996	0	TA	AA	0.0102	0.6603	-0.1046	0.004313
rs8067005:46119775:C:T	17	46119775	0.201399	0.996	0	C	T	0.0102	0.6613	-0.1045	0.004337
rs72534733:45952451:TTCTTC:T	17	45952451	0.0915886	0.975082	0	TTCTTC	T	0.014	0.663	0.0016	0.975
rs72823595:46124860:A:G	17	46124860	0.00445886	0.943567	0	A	G	-0.0641	0.663	0.4719	0.0407
rs372750269:46018387:C:G	17	46018387	0.000458864	0.457022	0	C	G	0.3528	0.6633	-0.2638	0.8429
rs147701933:45981105:A:C	17	45981105	0.0311645	0.962883	0	A	C	0.023	0.6635	-0.0829	0.3197
rs8073371:46096276:C:T	17	46096276	0.201399	0.997	0	C	T	0.0101	0.6645	-0.1053	0.004065
chr17_46086504_C_T	17	46086504	0.367342	1	1	C	T	-0.0082	0.6649	0.0794	0.007689
rs12947056:46149964:G:A	17	46149964	0.21074	1	0	G	A	0.0098	0.665	0.0784	0.02771
17:46010649:G:A	17	46010649	0.00245886	0.708655	0	G	A	-0.0903	0.6663	-0.1686	0.6029
rs73327306:46126158:G:A	17	46126158	0.0373766	0.997541	0	G	A	-0.0211	0.6669	0.1173	0.1229
rs184782703:45959024:A:G	17	45959024	0.002	0.84881	0	A	G	-0.1113	0.6673	-0.0985	0.808
rs62064917:46155700:G:A	17	46155700	0.21074	1	0	G	A	0.0097	0.6673	0.0789	0.02667
rs8065464:46158023:G:A	17	46158023	0.21074	1	0	G	A	0.0097	0.6675	0.0789	0.02667
rs11079804	17	46020698	0.162459	1	1	C	T	-0.0107	0.6677	0.1158	0.003076
17:46128194:G:T	17	46128194	0.002	0.667775	0	G	T	-0.1176	0.6679	-0.2213	0.6193
17:46128195:G:C	17	46128195	0.002	0.667775	0	G	C	-0.1176	0.6679	-0.2213	0.6193
rs8438:46147945:G:A	17	46147945	0.21074	1	0	G	A	0.0097	0.6683	0.079	0.02649
rs2525107:46041404:A:T	17	46041404	0.687965	0.997	0	A	T	-0.0085	0.6686	0.0849	0.006751
17:46049493:A:C	17	46049493	0.00445886	0.369155	0	A	C	-0.1008	0.6696	0.2094	0.5752
rs2597173:46055106:C:T	17	46055106	0.734775	1	0	C	T	0.0088	0.672	-0.0539	0.09907
chr17_46080586_C_G	17	46080586	0.368801	1	1	G	C	-0.008	0.6725	0.0753	0.01144
rs200348233:46132955:GCA:G	17	46132955	0.0156234	0.950671	0	GCA	G	-0.0337	0.6725	0.2272	0.07394
rs2525103:46082559:A:G	17	46082559	0.275342	0.999	0	A	G	0.0086	0.6727	-0.0762	0.01766
rs57263871:45951158:C:T	17	45951158	0.419013	0.959165	0	C	T	0.008	0.676	0.0138	0.6445
rs147483557:46030896:G:A	17	46030896	0.001	0.512835	0	G	A	-0.2384	0.6761	1.5464	0.08729
rs11654342:46126689:G:T	17	46126689	0.125718	0.999541	0	G	T	-0.0116	0.6762	0.0609	0.1662
rs757351	17	46081041	0.367801	1	1	G	T	-0.0079	0.6763	0.0758	0.01094
rs192235852:45951464:T:A	17	45951464	0.000458864	0.424905	0	T	A	-0.3398	0.6771	0.1849	0.8903
rs62064918:46155786:C:T	17	46155786	0.21074	1	0	C	T	0.0094	0.6771	0.0792	0.02607
rs8081209:46157540:A:G	17	46157540	0.21074	1	0	A	G	-0.0094	0.6772	-0.0792	0.02607
rs72823591:46122628:C:T	17	46122628	0.201399	0.994	0	C	T	0.0097	0.6779	-0.1019	0.005477
rs17617250:46010893:C:A	17	46010893	0.162459	0.998	0	C	A	-0.0103	0.6784	0.1128	0.003959
rs76311835:46026439:G:A	17	46026439	0.001	0.508541	0	G	A	-0.2348	0.6808	1.511	0.09489
rs2525088:46056995:C:T	17	46056995	0.733775	0.996459	0	C	T	0.0085	0.6818	-0.0535	0.1021
17:46045137:A:G	17	46045137	0.0143766	0.901177	0	A	G	0.0326	0.6825	-0.1023	0.409
rs75050985:46004625:C:T	17	46004625	0.003	0.61288	0	C	T	0.0805	0.6827	-0.0406	0.8969
rs186610136:46142265:A:T	17	46142265	0.00762341	0.937576	0	A	T	-0.0441	0.6848	-0.1175	0.4868
rs150465603:46143063:A:G	17	46143063	0.0163291	0.957152	0	A	G	0.0297	0.6854	0.0976	0.4058
rs141857586:45963045:G:A	17	45963045	0.001	0.701111	0	G	A	0.1914	0.6855	-0.2924	0.7012
rs2597175:46086911:C:A	17	46086911	0.367342	1	0	C	A	-0.0076	0.6864	0.0788	0.008126
rs2597174:46057029:G:A	17	46057029	0.733234	0.994918	0	G	A	0.0084	0.6867	-0.0536	0.1015
rs150662624:46092003:AC:A	17	46092003	0.00145886	0.969519	0	AC	A	0.094	0.6872	-0.0921	0.8012
rs368356261:46063004:C:G	17	46063004	0.000458864	0.464433	0	C	G	0.3264	0.6875	-0.2613	0.8445
rs112628589:46145579:A:C	17	46145579	0.0373766	1	0	A	C	0.0197	0.6875	-0.1182	0.1193
rs188904048:46067583:T:C	17	46067583	0.000458864	0.464433	0	T	C	0.3263	0.6876	-0.2615	0.8444
rs137892509:46022573:C:T	17	46022573	0.00554114	0.803282	0	C	T	0.0558	0.6909	-0.053	0.8111
rs112176137:46140309:G:A	17	46140309	0.0373766	1	0	G	A	-0.0194	0.6918	0.1174	0.1219
rs111910082:46141154:C:T	17	46141154	0.0373766	1	0	C	T	-0.0194	0.6918	0.1173	0.1219
rs112224454:46146521:C:T	17	46146521	0.0373766	1	0	C	T	-0.0193	0.6919	0.1173	0.122
rs6503949:46065743:G:A	17	46065743	0.734775	0.998541	0	G	A	0.0082	0.6932	-0.0555	0.08951
rs8082043	17	46073080	0.310728	1	1	C	T	0.0079	0.6942	-0.0571	0.06936
rs55956628:45996264:C:G	17	45996264	0.11026	0.998459	0	C	G	0.0114	0.6944	0.0127	0.7821
chr17_46029432_G_T	17	46029432	0.305658	1	1	T	G	0.0078	0.696	-0.0844	0.00732
17:46009750:GTTACAGGATCACAAT:G	17	46009750	0.00145886	0.742962	0	GTTACAGGATCACAAT	G	-0.1156	0.6973	0.2342	0.6174
rs2875746	17	46055347	0.734775	1	1	A	G	-0.008	0.6982	0.0552	0.09152
rs59128042:46112176:C:G	17	46112176	0.0517532	0.990082	0	C	G	0.0161	0.7007	-0.0515	0.4308
rs9674965:45972399:T:G	17	45972399	0.00254114	0.628404	0	T	G	-0.0839	0.7013	-0.2767	0.4175
rs73321689:45984921:A:G	17	45984921	0.00145886	0.945943	0	A	G	-0.0923	0.7024	-0.0198	0.9591
rs2905849:46074023:T:C	17	46074023	0.734316	0.999	0	T	C	-0.0079	0.7025	0.0616	0.05946
rs61197535:46144136:A:C	17	46144136	0.0373766	0.999	0	A	C	0.0186	0.7031	-0.1173	0.122
rs56279716:45999890:CTT:C	17	45999890	0.111718	0.993541	0	CTT	C	0.011	0.7044	0.0127	0.7809
rs117282161:45959490:G:A	17	45959490	0.0104589	0.918576	0	G	A	0.0349	0.706	-0.0092	0.9494
rs144304508:46101478:C:G	17	46101478	0.00545886	0.961294	0	C	G	0.0435	0.706	-0.0751	0.6721
17:46093204:A:T	17	46093204	0.00654114	0.742975	0	A	T	0.0528	0.7074	-0.3623	0.1045
rs2525090:46064925:C:G	17	46064925	0.734775	1	0	C	G	-0.0078	0.7079	0.0547	0.09416
rs2525087:46054264:C:A	17	46054264	0.735234	1	0	C	A	0.0078	0.7084	-0.0535	0.1019
rs2597172:46052793:A:G	17	46052793	0.735234	1	0	A	G	-0.0078	0.7086	0.0544	0.09635
rs76236083:46090005:A:T	17	46090005	0.00191773	0.790003	0	A	T	-0.0874	0.7087	-0.3156	0.3746
rs8076314:46054433:A:G	17	46054433	0.735234	1	0	A	G	-0.0078	0.7088	0.0535	0.1022
17:46054522:G:A	17	46054522	0.00408227	0.572936	0	G	A	0.079	0.71	0.0773	0.8213
rs148072893:46055047:C:T	17	46055047	0.00408227	0.572936	0	C	T	0.079	0.71	0.0773	0.8213
rs12602010:46126116:G:A	17	46126116	0.214658	0.990541	0	G	A	0.0084	0.7114	0.0788	0.02638
rs11871969:45992622:G:A	17	45992622	0.167035	0.994	0	G	A	0.0092	0.7129	-0.004	0.9191
chr17_46035011_C_G	17	46035011	0.304658	1	1	C	G	0.0074	0.713	-0.0845	0.007258
rs61542227:46104606:C:A	17	46104606	0.0517532	0.995541	0	C	A	-0.0153	0.713	0.0513	0.4304
rs183816482:46146647:A:T	17	46146647	0.004	0.912823	0	A	T	0.0528	0.7143	-0.494	0.03355
rs4793731:46033693:G:A	17	46033693	0.304117	1	0	G	A	-0.0073	0.7149	0.0849	0.006993
rs4793733:46033982:G:A	17	46033982	0.304117	1	0	G	A	-0.0073	0.7153	0.085	0.006944
rs149584707:46078329:C:T	17	46078329	0.0766709	0.954883	0	C	T	0.0129	0.7153	0.1136	0.04167
rs201902433:45970548:GC:G	17	45970548	0.001	0.840554	0	GC	G	0.1068	0.7154	-0.2045	0.6566
rs3833856:46030644:T:TG	17	46030644	0.305117	0.999459	0	T	TG	0.0073	0.7154	-0.0858	0.006414
rs117791644:46146675:C:T	17	46146675	0.0776361	0.948481	0	C	T	-0.0128	0.7178	-0.0685	0.2192
rs34047980:46151582:C:CTG	17	46151582	0.001	0.738013	0	C	CTG	-0.1507	0.7199	0.8398	0.1841
rs2597171:46052162:T:C	17	46052162	0.735234	1	0	T	C	-0.0074	0.7201	0.0542	0.09779
chr17_46151952_AAGG_INDEL	17	46151951	0.0373766	1	1	AAAGG	A	-0.0173	0.723	0.1143	0.1316
rs67892803	17	46088729	0.273424	1	1	TC	T	-0.0072	0.7253	0.0773	0.0164
rs56928103:45954609:A:G	17	45954609	0.0905886	0.973623	0	A	G	-0.0113	0.726	-0.0111	0.8277
rs118187865:46141507:T:G	17	46141507	0.00554114	0.912136	0	T	G	-0.0459	0.7264	-0.2592	0.1966
rs1986694	17	46026031	0.115506	1	1	G	C	0.0099	0.7267	0.0028	0.9494
rs79248788:45957357:T:G	17	45957357	0.00191773	0.890462	0	T	G	-0.0821	0.7274	-0.0704	0.8523
rs35841265:46150144:C:CA	17	46150144	0.21074	0.988	0	C	CA	0.0079	0.7292	0.0778	0.02985
rs4793737	17	46042257	0.307035	1	1	A	C	0.0069	0.731	-0.0917	0.003491
rs4794332:46040567:C:G	17	46040567	0.306494	0.999459	0	C	G	0.0069	0.7319	-0.0884	0.004896
rs2525092:46065080:G:A	17	46065080	0.734775	1	0	G	A	0.007	0.734	-0.0558	0.08772
17:45988915:C:T	17	45988915	0.0133766	0.967753	0	C	T	-0.0284	0.7352	-0.0401	0.7661
17:46142996:C:T	17	46142996	0.000541136	0.831731	0	C	T	-0.1431	0.7354	0.0835	0.8976
rs2597180:46061412:T:C	17	46061412	0.735234	1	0	T	C	-0.007	0.7356	0.0536	0.1014
17:45996368:TAC:T	17	45996368	0.167035	0.991082	0	TAC	T	0.0084	0.7357	-0.0005	0.9903
rs1476579:46070431:C:G	17	46070431	0.733775	0.999459	0	C	G	-0.007	0.7366	0.06	0.06642
rs72833487:45972980:G:A	17	45972980	0.0171645	0.940658	0	G	A	-0.0246	0.7369	-0.0872	0.4482
rs2525091:46065046:T:C	17	46065046	0.735234	1	0	T	C	-0.007	0.7373	0.0536	0.1012
rs72833488:45973130:C:T	17	45973130	0.0171645	0.940658	0	C	T	-0.0245	0.7374	-0.095	0.4083
rs56124407:45956784:T:C	17	45956784	0.0905886	0.979623	0	T	C	-0.0107	0.7378	-0.006	0.9057
rs34460325:46054123:G:A	17	46054123	0.000458864	0.953943	0	G	A	0.1493	0.7383	-0.7726	0.2838
rs144488817:46057548:C:A	17	46057548	0.000458864	0.954484	0	C	A	0.1493	0.7384	-0.7723	0.2839
rs146141716:46061477:T:C	17	46061477	0.000458864	0.961813	0	T	C	-0.1492	0.7386	0.769	0.286
rs185618815:46062454:C:T	17	46062454	0.000458864	0.961813	0	C	T	0.1492	0.7386	-0.769	0.286
rs71377322:45958467:G:A	17	45958467	0.0156709	0.992589	0	G	A	-0.0242	0.7396	0.2321	0.0425
rs2003477:46067612:A:T	17	46067612	0.734775	1	0	A	T	-0.0069	0.7407	0.0544	0.09589
rs2003478:46067663:C:T	17	46067663	0.734775	1	0	C	T	0.0068	0.7412	-0.0553	0.09084
rs739853:46067557:C:A	17	46067557	0.734775	1	0	C	A	0.0068	0.7413	-0.0552	0.09152
rs34190379:46063252:G:A	17	46063252	0.189165	1	0	G	A	0.0077	0.7424	0.0986	0.007576
rs12952517:45969393:C:A	17	45969393	0.0156709	0.99013	0	C	A	-0.024	0.7428	0.2288	0.04659
rs11270193:46063791:C:CCTTTCAGTGTTGCT	17	46063791	0.735234	0.999	0	C	CCTTTCAGTGTTGCT	0.0068	0.7431	-0.0541	0.09831
rs142301643:46112109:G:A	17	46112109	0.0911425	0.992459	0	G	A	-0.0105	0.7453	-0.0509	0.3159
rs187347621:46013361:G:A	17	46013361	0.00145886	0.865304	0	G	A	0.0759	0.7457	-0.3044	0.3774
rs78034826:46113667:A:C	17	46113667	0.0911425	0.991459	0	A	C	0.0104	0.7476	0.0511	0.3143
17:45999622:C:T	17	45999622	0.0133766	0.969671	0	C	T	-0.0271	0.7477	-0.0368	0.7858
rs151040334:46153148:C:A	17	46153148	0.000458864	0.910896	0	C	A	-0.1322	0.7484	0.1466	0.8025
rs148534009:46114200:G:A	17	46114200	0.001	0.461292	0	G	A	-0.1205	0.7491	0.6921	0.2221
rs2525105:46039543:G:T	17	46039543	0.865035	0.992459	0	G	T	-0.0084	0.7526	-0.0125	0.7667
rs146381669:46106465:G:A	17	46106465	0.002	0.600943	0	G	A	0.0946	0.7528	0.4048	0.4165
17:46043414:G:A	17	46043414	0.00254114	0.54756	0	G	A	0.0796	0.7535	0.5192	0.1975
rs12453773:45952431:T:C	17	45952431	0.0915886	0.972165	0	T	C	-0.01	0.7547	0.0035	0.9443
rs34273685:46040647:C:CT	17	46040647	0.282494	0.954212	0	C	CT	-0.0065	0.7565	0.0886	0.007147
rs2597181:46062164:T:C	17	46062164	0.735234	1	0	T	C	-0.0064	0.7579	0.054	0.09869
rs7211900:45956816:T:C	17	45956816	0.0915886	0.978623	0	T	C	-0.0098	0.7581	-0.0028	0.9565
rs2597179:46061030:G:C	17	46061030	0.735234	1	0	G	C	0.0064	0.7581	-0.054	0.09871
rs2597161:46063520:A:G	17	46063520	0.735234	1	0	A	G	-0.0064	0.7585	0.0548	0.09384
rs80059914:46098091:C:T	17	46098091	0.0911425	0.995918	0	C	T	-0.0099	0.7587	-0.0507	0.3174
rs78286754:45956270:T:A	17	45956270	0.0915886	0.977623	0	T	A	0.0098	0.7598	0.0021	0.9674
rs729786:46060231:T:G	17	46060231	0.735234	1	0	T	G	-0.0063	0.7619	0.0534	0.1025
rs8082055:45955103:C:T	17	45955103	0.0915886	0.976623	0	C	T	0.0096	0.7629	0.0025	0.9607
rs147682532:46065526:T:C	17	46065526	0.00945886	0.336601	0	T	C	-0.0532	0.7632	0.1778	0.5284
rs2525093:46065092:A:C	17	46065092	0.735234	1	0	A	C	-0.0062	0.7637	0.0547	0.09439
chr17_46090769_G_T	17	46090769	0.270965	1	1	G	T	-0.0061	0.7645	0.0745	0.02105
rs149422445:45982360:A:T	17	45982360	0.0168355	0.887035	0	A	T	-0.0236	0.7653	-0.0867	0.4942
chr17_46070253_A_C	17	46070253	0.733775	1	1	C	A	0.0062	0.7666	-0.0577	0.07739
rs2905848:46073927:A:G	17	46073927	0.733775	1	0	A	G	-0.0061	0.7684	0.0608	0.06266
rs368585274:46073992:C:CGGGG	17	46073992	0.733775	1	0	C	CGGGG	0.0061	0.7684	-0.0608	0.06265
rs191087287:46052171:G:A	17	46052171	0.000458864	0.743605	0	G	A	-0.1352	0.769	0.5691	0.46
rs189402724:46092136:G:A	17	46092136	0.001	0.959234	0	G	A	0.101	0.7714	0.3592	0.4973
rs2525094:46071584:T:C	17	46071584	0.734234	1	0	T	C	-0.006	0.7728	0.0593	0.06982
rs16949296:45984949:A:G	17	45984949	0.0909652	0.999	0	A	G	-0.009	0.7753	-0.0068	0.8925
rs9944405:45953033:T:A	17	45953033	0.0915886	0.974623	0	T	A	0.009	0.7771	-0.0002	0.9965
rs145808753:46062044:C:T	17	46062044	0.0198355	0.974753	0	C	T	-0.0195	0.7779	0.0766	0.4885
rs12232488:45970144:G:A	17	45970144	0.0905886	0.994165	0	G	A	0.0089	0.7785	0.0096	0.8486
rs73321620:45971373:A:T	17	45971373	0.00145886	0.931484	0	A	T	-0.0681	0.7797	-0.0228	0.9533
rs2597165	17	46070706	0.733775	1	1	A	G	-0.0058	0.7803	0.0597	0.06776
rs3764393:45976738:T:C	17	45976738	0.0915064	0.997541	0	T	C	-0.0088	0.7807	-0.007	0.8888
rs56273045:46029215:T:C	17	46029215	0.0112468	0.791516	0	T	C	-0.0257	0.7807	-0.1323	0.3744
rs17680229	17	46129762	0.133117	1	1	G	A	0.0075	0.7828	0.0774	0.06998
rs729785:46060159:A:G	17	46060159	0.735775	0.999	0	A	G	-0.0057	0.7831	0.054	0.09898
rs737130:46071935:A:G	17	46071935	0.733775	1	0	A	G	-0.0056	0.7866	0.0609	0.06223
rs180747198:46049343:G:A	17	46049343	0.00254114	0.666367	0	G	A	0.049	0.7883	0.2362	0.4107
rs148039378:46067631:G:C	17	46067631	0.00808227	0.370572	0	G	C	-0.0495	0.7885	-0.5019	0.09522
rs7503584	17	46055036	0.189165	1	1	G	A	0.0062	0.7905	0.0972	0.008469
rs117129265:45963206:T:A	17	45963206	0.0382943	0.930623	0	T	A	0.0133	0.7913	-0.0106	0.8914
rs2905851:46074093:G:A	17	46074093	0.734234	0.999	0	G	A	0.0054	0.7931	-0.0596	0.06811
rs12940701:46114620:C:T	17	46114620	0.287506	0.993082	0	C	T	0.0053	0.7945	0.0635	0.04625
17:46104121:G:A	17	46104121	0.00454114	0.793003	0	G	A	0.0384	0.7947	0.2493	0.2704
rs138352360:46073081:G:A	17	46073081	0.000458864	0.944415	0	G	A	0.1159	0.7952	-0.687	0.3398
17:46086564:G:A	17	46086564	0.00845886	0.328484	0	G	A	-0.0491	0.7952	-0.1452	0.631
rs73323310:45999120:A:G	17	45999120	0.109718	0.999	0	A	G	0.0075	0.7972	0.0228	0.6198
rs2325749:46024973:C:A	17	46024973	0.302576	0.993082	0	C	A	-0.0052	0.798	0.0808	0.01068
rs72823504:46030645:G:A	17	46030645	0.00445886	0.936601	0	G	A	0.0384	0.798	-0.4229	0.07063
rs112232483:45956812:CTTTTTGTTTT:C	17	45956812	0.295082	0.968	0	CTTTTTGTTTT	C	-0.0053	0.7981	0.0821	0.01151
rs62064873:46074878:A:G	17	46074878	0.266225	0.997918	0	A	G	0.0053	0.7981	-0.0613	0.06073
rs111671883:46132578:G:A	17	46132578	0.0110823	0.965952	0	G	A	-0.0228	0.7985	-0.221	0.1052
rs16949651	17	46019601	0.138636	1	1	A	G	0.0067	0.799	0.0219	0.5978
rs59976747:46009811:C:T	17	46009811	0.109718	1	0	C	T	-0.0074	0.7995	-0.0233	0.6122
rs56407566:46148155:C:T	17	46148155	0.195316	1	0	C	T	0.0059	0.7999	-0.1094	0.003039
rs7213084:45956580:A:T	17	45956580	0.0905886	0.978623	0	A	T	-0.0081	0.8003	-0.0058	0.9095
rs7211357:45956579:G:T	17	45956579	0.0905886	0.978623	0	G	T	0.0081	0.8004	0.0058	0.9095
rs201950955:46083930:AATT:A	17	46083930	0.0127057	0.90107	0	AATT	A	0.0219	0.8004	0.0422	0.7577
rs12602494:46037607:G:A	17	46037607	0.304117	1	0	G	A	-0.0051	0.8008	0.0843	0.00741
rs2905855	17	46081915	0.448013	1	1	G	A	-0.0046	0.8013	0.0989	0.0006464
rs72825512:46155069:C:T	17	46155069	0.195316	1	0	C	T	0.0058	0.8029	-0.1091	0.003102
rs2905852:46075391:G:T	17	46075391	0.266225	0.997459	0	G	T	-0.0052	0.8035	0.0617	0.05926
rs140302489:46098726:T:C	17	46098726	0.00554114	0.976788	0	T	C	-0.0301	0.8035	-0.3152	0.0982
rs8065112:45972415:T:G	17	45972415	0.287446	0.660918	0	T	G	-0.0061	0.8065	-0.0435	0.2653
rs10579563:46043437:GGAAA:G	17	46043437	0.308035	0.981	0	GGAAA	G	-0.0049	0.8097	0.091	0.004047
17:46079573:CAATAAAATAA:C	17	46079573	0.024788	0.922952	0	CAATAAAATAA	C	-0.0142	0.8133	-0.111	0.2516
rs117759565:46036753:C:T	17	46036753	0.001	0.48807	0	C	T	-0.1317	0.8156	1.2629	0.1506
rs79146656:46085284:A:G	17	46085284	0.0939177	0.998541	0	A	G	0.0074	0.8161	-0.0315	0.5233
rs72825504:46139479:C:T	17	46139479	0.195316	1	0	C	T	0.0054	0.8164	-0.109	0.003156
rs16949579:46007970:G:C	17	46007970	0.001	0.30336	0	G	C	-0.0915	0.8166	-0.664	0.2781
rs11312723:46085586:TA:T	17	46085586	0.105377	0.977247	0	TA	T	-0.0071	0.8166	0.0321	0.5002
rs7214154:45958723:C:T	17	45958723	0.0905886	0.984623	0	C	T	0.0074	0.8172	0.0066	0.896
rs150152088:46020436:A:G	17	46020436	0.001	0.826791	0	A	G	-0.0666	0.8172	0.2606	0.5658
rs201764131:46140440:C:CA	17	46140440	0.304576	0.938918	0	C	CA	-0.0048	0.8177	-0.1258	0.0001071
rs2905853:46075551:C:T	17	46075551	0.266225	0.996918	0	C	T	-0.0047	0.8191	0.0619	0.05839
rs7217147:45958903:G:A	17	45958903	0.0905886	0.985623	0	G	A	0.0073	0.8199	0.0067	0.8943
rs150624334:46040603:TTTCAGACTTCAAGCC:T	17	46040603	0.304576	0.999459	0	TTTCAGACTTCAAGCC	T	-0.0045	0.8209	0.0875	0.005461
rs143921270:46124066:C:G	17	46124066	0.012	0.966459	0	C	G	0.0185	0.8218	-0.0164	0.8978
rs72823601:46135208:C:T	17	46135208	0.195316	1	0	C	T	0.0053	0.8219	-0.1084	0.003303
rs72823599:46132424:C:G	17	46132424	0.195316	1	0	C	G	-0.0053	0.8226	0.1084	0.003327
rs2905850:46074073:A:G	17	46074073	0.734234	1	0	A	G	-0.0046	0.8238	0.0596	0.06839
rs185462036:46078345:G:A	17	46078345	0.002	0.788025	0	G	A	0.0484	0.8249	-0.6085	0.07923
rs73325369:46085289:T:C	17	46085289	0.0939177	0.998541	0	T	C	0.007	0.8249	-0.0314	0.5251
rs112491235:46085024:T:G	17	46085024	0.0939177	0.998541	0	T	G	0.007	0.8251	-0.0315	0.5234
rs8075245:46083872:A:C	17	46083872	0.0934589	0.998541	0	A	C	0.007	0.8253	-0.0323	0.5138
rs75483071:45949659:C:T	17	45949659	0.0187532	0.971506	0	C	T	-0.0153	0.8256	0.0343	0.7577
rs73325374:46085526:C:T	17	46085526	0.0939177	0.999	0	C	T	-0.007	0.8256	0.0313	0.5262
rs8071778	17	46080233	0.172671	1	1	G	C	0.0053	0.8273	0.0652	0.08959
rs148719838:46037980:A:G	17	46037980	0.00945886	0.326684	0	A	G	-0.0392	0.828	0.1938	0.5016
rs149784060:45981323:T:C	17	45981323	0.0895886	0.999	0	T	C	-0.0067	0.8336	-0.0058	0.9093
rs190664417:46094268:T:G	17	46094268	0.00508227	0.406819	0	T	G	0.0438	0.8362	0.5971	0.08424
rs74853612:45978646:T:C	17	45978646	0.0895886	0.998541	0	T	C	-0.0066	0.8363	-0.0061	0.9042
rs74253633:45960314:C:T	17	45960314	0.0905886	0.992165	0	C	T	0.0066	0.8367	0.0075	0.8814
rs78160169:45960746:A:G	17	45960746	0.0905886	0.992165	0	A	G	-0.0065	0.8371	-0.0075	0.881
rs58695897:45960948:C:A	17	45960948	0.0905886	0.992165	0	C	A	0.0065	0.8371	0.0076	0.8806
17:46079573:CAATAAAATAA:CAATAA	17	46079573	0.38226	0.999	0	CAATAAAATAA	CAATAA	-0.0039	0.8372	0.0715	0.01571
rs16949418:45991240:C:T	17	45991240	0.294247	0.989541	0	C	T	0.0042	0.8379	0.0037	0.9079
rs1133221:45976389:T:G	17	45976389	0.0895886	0.997541	0	T	G	-0.0065	0.8383	-0.0063	0.9002
rs56006220:45975989:T:C	17	45975989	0.0895886	0.997541	0	T	C	-0.0065	0.8386	-0.0064	0.8995
rs16949270	17	45982473	0.0895886	1	1	C	T	0.0064	0.8402	0.0055	0.9127
rs4614773:45963573:G:A	17	45963573	0.0905886	0.992623	0	G	A	0.0064	0.8408	0.0082	0.8705
rs34785219:46096126:G:A	17	46096126	0.285965	0.996	0	G	A	0.0041	0.8409	0.0648	0.04205
17:46121765:CTTTTTTTTTTTT:C	17	46121765	0.212329	0.913541	0	CTTTTTTTTTTTT	C	0.0047	0.8437	-0.0714	0.05537
rs4450442:45965943:T:G	17	45965943	0.0905886	0.992623	0	T	G	-0.0062	0.8451	-0.0088	0.8616
rs2525096:46076965:A:G	17	46076965	0.269143	0.989459	0	A	G	0.004	0.8462	-0.0611	0.06128
rs145920997:45967501:TGAG:T	17	45967501	0.00245886	0.352269	0	TGAG	T	0.0435	0.847	-0.4448	0.2045
rs73985430:45960639:C:T	17	45960639	0.00145886	0.923826	0	C	T	0.047	0.8471	0.028	0.9428
rs35653190:46077967:C:T	17	46077967	0.211576	0.992082	0	C	T	0.0043	0.8475	0.1025	0.003821
17:45978607:G:A	17	45978607	0.000541136	0.476639	0	G	A	0.1212	0.8489	1.2318	0.203
chr17_46079756_A_G	17	46079756	0.38226	1	1	G	A	-0.0036	0.8502	0.0714	0.01589
rs59811700:45988533:G:A	17	45988533	0.296247	0.994541	0	G	A	0.0038	0.8504	0.0029	0.9278
rs35367450:45968785:AC:A	17	45968785	0.0156709	0.977506	0	AC	A	-0.0137	0.8515	0.2184	0.05679
17:46124994:A:ACCGCCAACGTT	17	46124994	0.164823	0.857589	0	A	ACCGCCAACGTT	-0.0049	0.8542	0.1197	0.004738
rs56218899:45967279:G:A	17	45967279	0.0905886	0.992623	0	G	A	0.0058	0.8548	0.0101	0.8412
rs73325377:46085824:G:A	17	46085824	0.0934589	0.999	0	G	A	-0.0058	0.8555	0.0325	0.511
rs369206391:46107697:A:C	17	46107697	0.222693	0.914576	0	A	C	-0.0042	0.8576	0.0971	0.008504
rs61702159:45966715:C:T	17	45966715	0.0905886	0.992623	0	C	T	0.0057	0.8584	0.0096	0.8484
rs144929025:46142778:T:A	17	46142778	0.000541136	0.965658	0	T	A	0.0682	0.8593	-0.672	0.2487
rs186988055:46151864:C:T	17	46151864	0.00154114	0.823927	0	C	T	0.0511	0.8595	-0.4339	0.3527
rs8066574:45969835:G:C	17	45969835	0.71313	0.992623	0	G	C	0.0036	0.8608	0.0183	0.5664
rs12942207:45968294:C:T	17	45968294	0.71313	0.992082	0	C	T	0.0036	0.8609	0.0191	0.5503
rs11650395:45989025:A:C	17	45989025	0.295706	0.994541	0	A	C	-0.0035	0.8614	-0.0039	0.9032
rs8065110:45972411:T:G	17	45972411	0.291446	0.655918	0	T	G	-0.0042	0.867	-0.0481	0.2185
rs8069936:46074349:A:T	17	46074349	0.406316	0.689506	0	A	T	0.0037	0.8672	0.0863	0.01377
rs74268095:46012017:AAAAAT:A	17	46012017	0.168576	0.997541	0	AAAAAT	A	0.0041	0.8674	0.0106	0.7844
rs2428608:46040795:C:T	17	46040795	0.560541	0.999459	0	C	T	0.0031	0.8676	-0.0829	0.004436
rs34538173:46050036:G:GT	17	46050036	0.69607	0.92913	0	G	GT	-0.0034	0.8685	0.046	0.1595
rs186311143:46113966:C:A	17	46113966	0.005	0.854696	0	C	A	0.0239	0.8689	-0.3108	0.1741
rs33983467:46102904:G:A	17	46102904	0.286506	0.998	0	G	A	0.0032	0.8724	0.0657	0.03898
rs144822160:46068905:C:T	17	46068905	0.000541136	0.496189	0	C	T	-0.0849	0.874	0.7602	0.3525
rs138006415:46117279:T:C	17	46117279	0.0124589	0.969165	0	T	C	0.0124	0.8792	0.0008	0.9951
rs144242505:46138787:A:G	17	46138787	0.003	0.92726	0	A	G	-0.0285	0.88	-0.8319	0.007077
rs186086042:46093207:A:T	17	46093207	0.00745886	0.716269	0	A	T	0.0193	0.8813	-0.4354	0.03349
rs2325748:45974251:C:T	17	45974251	0.296247	0.994082	0	C	T	0.003	0.8818	0.0007	0.9821
rs78947427:46097819:T:C	17	46097819	0.0228702	0.989329	0	T	C	0.0091	0.8826	-0.0093	0.9249
17:46129188:A:G	17	46129188	0.000541136	0.448024	0	A	G	-0.0915	0.8853	-1.2389	0.1974
rs143469518:46040327:G:A	17	46040327	0.0284589	0.986	0	G	A	0.0079	0.8855	-0.0215	0.8027
rs111994792:45981936:G:C	17	45981936	0.001	0.842108	0	G	C	-0.0495	0.8857	-0.7494	0.1576
rs885634:46072229:A:G	17	46072229	0.732775	0.997459	0	A	G	-0.003	0.8862	0.0579	0.07667
rs117817179:46123055:C:A	17	46123055	0.003	0.926095	0	C	A	0.0269	0.887	0.8323	0.007069
rs144693170:46129586:G:A	17	46129586	0.00983546	0.921282	0	G	A	0.0143	0.8872	0.0179	0.9109
rs185910021:46150179:C:T	17	46150179	0.00583546	0.478775	0	C	T	0.0218	0.8884	0.0482	0.8424
rs2525109	17	46042327	0.560541	1	1	C	T	0.0026	0.8892	-0.0837	0.004067
chr17_46042365_A_T	17	46042365	0.560541	1	1	A	T	-0.0026	0.8892	0.0837	0.004067
17:46116901:T:G	17	46116901	0.00245886	0.637813	0	T	G	0.0348	0.8893	0.3633	0.3581
rs147467124:45996394:T:TAC	17	45996394	0.0171645	0.919117	0	T	TAC	-0.0104	0.8905	0.1233	0.2957
rs4794373	17	46093858	0.0926836	1	1	A	G	0.0044	0.891	0.0645	0.1981
rs2597166:46072665:G:A	17	46072665	0.606269	0.998	0	G	A	-0.0026	0.8918	-0.0613	0.03845
c17_pos43303852	17	45948853	0.0137532	1	1	T	C	-0.0104	0.8938	-0.2261	0.06383
rs149951509:46126067:T:C	17	46126067	0.00854114	0.834	0	T	C	0.0135	0.8947	-0.2783	0.08014
rs78358763:46024489:T:C	17	46024489	0.000458864	0.427526	0	T	C	-0.0891	0.8971	-1.3955	0.1669
rs187107340:46079340:G:A	17	46079340	0.00354114	0.883645	0	G	A	0.0227	0.8996	0.4398	0.1195
rs75897047:45974494:C:T	17	45974494	0.0349177	0.963541	0	C	T	0.0061	0.9031	-0.0106	0.8931
rs2240123	17	46153296	0.125883	1	1	C	T	0.0034	0.9037	-0.0989	0.02266
17:46059513:C:T	17	46059513	0.000541136	0.675727	0	C	T	-0.0632	0.9075	-0.4244	0.6043
rs75761992	17	46124148	0.0796014	1	1	T	C	0.0039	0.909	0.0354	0.5138
rs144717322:45988833:C:G	17	45988833	0.013	0.929411	0	C	G	-0.01	0.9097	-0.147	0.2905
rs6503964:46082957:T:G	17	46082957	0.440095	0.980918	0	T	G	0.0021	0.9097	-0.1043	0.0003726
rs1108833:45982797:G:A	17	45982797	0.322329	0.994	0	G	A	-0.0022	0.911	0.0748	0.01638
rs141314511:45965671:C:T	17	45965671	0.00145886	0.815947	0	C	T	0.0245	0.9113	0.235	0.48
rs371256663:45950171:GAGCCGT:G	17	45950171	0.037788	0.894057	0	GAGCCGT	G	0.0056	0.9116	0.0274	0.7334
rs55822955:45961813:A:G	17	45961813	0.413459	0.997082	0	A	G	-0.002	0.9149	-0.0751	0.01106
rs72823592:46123004:G:A	17	46123004	0.226857	0.992459	0	G	A	-0.0023	0.9164	-0.0866	0.01347
rs4794286:45990597:T:C	17	45990597	0.32387	0.988918	0	T	C	0.0021	0.9166	-0.07	0.02487
rs146998127:46063829:ACT:A	17	46063829	0.00254114	0.279494	0	ACT	A	0.0407	0.9167	-0.182	0.7495
rs4794318	17	46028071	0.139576	1	1	G	A	0.0028	0.9178	0.0139	0.7396
17:46065138:T:C	17	46065138	0.00345886	0.831813	0	T	C	-0.0178	0.9179	-0.2597	0.3176
17:46154819:T:G	17	46154819	0.00345886	0.773813	0	T	G	0.0171	0.9188	-0.0697	0.7846
17:46156437:G:C	17	46156437	0.00308227	0.877079	0	G	C	0.017	0.9202	-0.053	0.8402
17:46119484:CTTTTTCTTTTTCTT:C	17	46119484	0.00516454	0.843304	0	CTTTTTCTTTTTCTT	C	0.0143	0.9219	-0.0945	0.6852
rs7211859:45986282:C:A	17	45986282	0.322329	0.995459	0	C	A	-0.0019	0.9243	0.0741	0.01741
rs61463979:45954373:G:A	17	45954373	0.283082	0.981082	0	G	A	0.002	0.925	-0.087	0.007806
rs2069295:45995891:C:G	17	45995891	0.0284589	0.985329	0	C	G	-0.0051	0.9252	0.0144	0.8666
rs34485742:46097049:CA:C	17	46097049	0.550718	0.753013	0	CA	C	0.002	0.9256	0.0098	0.7681
rs72823505:46030994:C:T	17	46030994	0.283165	0.995459	0	C	T	-0.0019	0.9262	-0.0062	0.8467
rs35662223	17	46089813	0.210576	1	1	T	C	-0.002	0.928	-0.1004	0.004462
rs4794261:45982346:C:G	17	45982346	0.322329	0.995	0	C	G	0.0018	0.9288	-0.0748	0.01635
rs11079802	17	46010380	0.288541	1	1	G	C	0.0018	0.9291	0.0046	0.8855
rs2525101:46078662:A:T	17	46078662	0.00191773	0.960013	0	A	T	-0.0203	0.9292	-0.2492	0.4922
rs2525098	17	46077360	0.368684	1	1	G	T	0.0016	0.9307	0.0822	0.00599
rs35835097:46031022:C:CA	17	46031022	0.225753	0.795506	0	C	CA	-0.0021	0.9322	0.0988	0.0106
rs117418848:46108501:G:A	17	46108501	0.0153766	0.949589	0	G	A	-0.0065	0.9333	-0.073	0.556
17:46149256:G:A	17	46149256	0.002	0.82274	0	G	A	0.018	0.9371	-0.0272	0.9393
17:46149258:A:T	17	46149258	0.002	0.82274	0	A	T	-0.018	0.9371	0.0272	0.9393
17:45949686:C:A	17	45949686	0.002	0.627997	0	C	A	0.0229	0.9385	-0.0618	0.8927
rs11870852:45978111:C:T	17	45978111	0.322329	0.994	0	C	T	-0.0015	0.9398	0.0752	0.01588
rs147011598:46109283:A:C	17	46109283	0.00345886	0.904399	0	A	C	-0.0127	0.9401	-0.2913	0.2844
rs142022194:46091277:ACT:A	17	46091277	0.00191773	0.929272	0	ACT	A	0.0157	0.9409	0.384	0.2625
rs71366821:46144855:TA:T	17	46144855	0.0954589	0.523234	0	TA	T	0.0031	0.9414	-0.001	0.9875
rs72833480:45964861:G:A	17	45964861	0.281411	0.992623	0	G	A	-0.0015	0.9429	-0.0166	0.6058
17:46095372:G:T	17	46095372	0.001	0.872854	0	G	T	0.0204	0.9439	-0.2702	0.5419
17:45996797:A:T	17	45996797	0.001	0.497232	0	A	T	0.0353	0.9447	1.1409	0.1541
rs75842564:46079722:T:C	17	46079722	0.002	0.86045	0	T	C	0.015	0.9506	-0.2475	0.5109
rs138125040:46104166:G:A	17	46104166	0.007	0.735329	0	G	A	0.008	0.951	-0.069	0.7386
rs11079800:45965966:C:T	17	45965966	0.280952	0.992623	0	C	T	-0.0012	0.9519	-0.0172	0.5926
rs117371336:45949770:T:C	17	45949770	0.0137532	0.992918	0	T	C	-0.0047	0.952	-0.2355	0.0546
rs193127567:46133535:G:C	17	46133535	0.00145886	0.80687	0	G	C	0.0173	0.952	-0.4044	0.3576
rs184804668:46006245:C:T	17	46006245	0.001	0.314101	0	C	T	0.0361	0.9525	0.7756	0.4364
17:46094669:T:C	17	46094669	0.003	0.553804	0	T	C	0.0107	0.9539	-0.1425	0.62
rs58153356:45975050:G:A	17	45975050	0.000541136	0.534364	0	G	A	-0.0337	0.9554	1.7937	0.05986
rs186304463:45953982:G:A	17	45953982	0.00145886	0.529174	0	G	A	0.0185	0.9564	0.5772	0.2573
rs66535122	17	46038448	0.563	1	1	GC	G	0.001	0.9584	-0.0782	0.007341
rs199942089:46146053:T:C	17	46146053	0.00437659	0.829854	0	T	C	-0.0076	0.9598	-0.0161	0.9446
rs72833470:45950721:A:G	17	45950721	0.28	0.975623	0	A	G	-0.001	0.9626	0.0917	0.005189
17:46013153:C:A	17	46013153	0.00554114	0.923576	0	C	A	-0.0061	0.9628	0.3902	0.05706
17:45958124:G:A	17	45958124	0.390048	0.591823	0	G	A	-0.001	0.9678	-0.0348	0.3681
rs192715896:46092107:T:C	17	46092107	0.00145886	0.459643	0	T	C	0.0136	0.9689	-0.178	0.7441
rs149172670:46107389:C:T	17	46107389	0.0123766	0.958082	0	C	T	-0.0032	0.9707	-0.0784	0.5647
rs11651753:46029089:C:T	17	46029089	0.431623	0.998	0	C	T	0.0006	0.976	0.0834	0.004366
rs117284771:46053767:C:G	17	46053767	0.0294589	0.984	0	C	G	0.0015	0.9773	0.0312	0.7129
rs368065252:46085745:C:T	17	46085745	0.000458864	0.428478	0	C	T	0.0192	0.9773	0.8994	0.3625
rs180739791:46068841:T:C	17	46068841	0.000458864	0.918839	0	T	C	-0.0111	0.9784	0.3138	0.5894
rs3190376:46002394:C:A	17	46002394	0.00708227	0.936541	0	C	A	-0.003	0.9789	-0.0106	0.9527
rs80226508:45958054:T:C	17	45958054	0.0597184	0.966294	0	T	C	-0.001	0.9807	0.001	0.9875
rs375428999:45949509:CAGGT:C	17	45949509	0.28	0.974623	0	CAGGT	C	0.0005	0.9814	0.0913	0.005446
rs66515361:46038312:TA:T	17	46038312	0.584082	0.939294	0	TA	T	0.0004	0.9837	-0.0906	0.002715
rs117974417:46156510:C:G	17	46156510	0.144199	0.990082	0	C	G	-0.0005	0.9847	0.1206	0.003774
rs8182261:45970263:C:T	17	45970263	0.263247	0.981247	0	C	T	0.0004	0.9855	-0.0056	0.8663
rs12940653:46043033:T:A	17	46043033	0.00654114	0.936082	0	T	A	-0.002	0.9863	0.2207	0.2246
rs76849509:45967285:G:A	17	45967285	0.00345886	0.906835	0	G	A	0.0028	0.9869	0.0147	0.9555
rs11654010	17	45960865	0.322411	1	1	T	C	-0.0003	0.9883	-0.0812	0.009085
rs72833466:45948952:C:A	17	45948952	0.28	0.974082	0	C	A	-0.0002	0.9907	-0.0917	0.00524
rs201635768:46015020:GT:G	17	46015020	0.146801	0.871095	0	GT	G	-0.0002	0.9932	-0.0265	0.5425
rs11554926:46147724:A:C	17	46147724	0.005	0.939329	0	A	C	-0.001	0.9939	-0.3931	0.06145
rs150324254:46117139:A:G	17	46117139	0.00508227	0.830152	0	A	G	0.001	0.9943	0.0267	0.9029
rs35336840:45966108:A:G	17	45966108	0.32287	0.997541	0	A	G	-0.0001	0.995	-0.0793	0.01095
rs17616603:45959620:T:C	17	45959620	0.32287	0.998541	0	T	C	0.0001	0.9954	-0.0808	0.009418
rs200755189:46055160:T:C	17	46055160	0.00145886	0.386415	0	T	C	-0.0013	0.9975	0.6477	0.317
17:46006486:G:A	17	46006486	0.00337659	0.287402	0	G	A	0.0009	0.9987	-0.0632	0.9399
rs60580012:45969808:C:T	17	45969808	0.32287	0.996541	0	C	T	0	0.9991	0.0775	0.01292
rs61422354:45969809:A:G	17	45969809	0.32287	0.996541	0	A	G	0	0.9991	-0.0775	0.01292
rs180865298:45962917:G:A	17	45962917	0.000541136	0.278693	0	G	A	NULL	NULL	NULL	NULL
rs185589060:45965727:G:A	17	45965727	0.000541136	0.279611	0	G	A	NULL	NULL	NULL	NULL
rs187101394:45970139:G:A	17	45970139	0.000541136	0.227297	0	G	A	NULL	NULL	NULL	NULL
rs62067384:46027153:G:A	17	46027153	0.001	0.101762	0	G	A	NULL	NULL	NULL	NULL
17:46028225:C:CTTAT	17	46028225	0.001	0.228889	0	C	CTTAT	NULL	NULL	NULL	NULL
17:46097422:G:A	17	46097422	0.000458864	0.285519	0	G	A	NULL	NULL	NULL	NULL
rs190270638:46121609:T:C	17	46121609	0.001	0.247452	0	T	C	NULL	NULL	NULL	NULL
rs371153948:46129831:G:T	17	46129831	0.001	0.287819	0	G	T	NULL	NULL	NULL	NULL

## Sheet: Combined BRCA2
Table S1. Results of the combined iCOGS and Oncoarray studies at the CDK5RAP3 locus (imputed and genotyped variants) in BRCA2 mutation carriers.
SNP	Chromosome	Position (hg19)	Frequency	r2	Typed (0/1)	Allele 1	Allele 2	breast cancer log HR	breast cancer P value	ovarian cancer log HR	ovarian cancer P value
rs77563750:46072710:G:A	17	46072710	0.0744149	0.999	0	G	A	0.1529	0.000648	-0.124	0.1751
rs17617360:46077099:A:G	17	46077099	0.0758979	0.994517	0	A	G	-0.151	0.0007242	0.1296	0.1547
rs11650304:46035001:C:G	17	46035001	0.0739319	0.995517	0	C	G	-0.1493	0.0009044	0.1216	0.1854
rs149584707:46078329:C:T	17	46078329	0.0729319	0.953381	0	C	T	0.1508	0.001146	-0.1286	0.1739
rs11650043:46027852:G:A	17	46027852	0.0749319	0.995034	0	G	A	0.141	0.001674	-0.111	0.2255
rs1051001:46137905:C:T	17	46137905	0.0754489	1	0	C	T	0.1398	0.00171	-0.1391	0.1259
rs114759915:46117470:C:T	17	46117470	0.0759319	0.996966	0	C	T	0.137	0.002014	-0.1423	0.1158
rs7210041:46113822:C:T	17	46113822	0.0759319	0.998483	0	C	T	0.1365	0.002139	-0.1528	0.09184
rs373778488:46026682:TCAACC:T	17	46026682	0.0759319	0.995517	0	TCAACC	T	0.1349	0.002492	-0.1029	0.2578
rs885635:46072228:C:T	17	46072228	0.270483	0.994517	0	C	T	0.0816	0.002554	-0.0912	0.09948
rs117972490:46046649:G:A	17	46046649	0.272	0.994551	0	G	A	0.0813	0.002651	-0.0902	0.1033
17:46129188:A:G	17	46129188	0.000517025	0.643411	0	A	G	-2.0391	0.00288	1.3059	0.2876
rs117990138:46116462:G:A	17	46116462	0.071517	0.996966	0	G	A	0.1337	0.003485	-0.1185	0.2048
rs61454280:46050125:C:T	17	46050125	0.271	0.999483	0	C	T	0.0785	0.003627	-0.0949	0.08607
rs9895554:46123642:A:C	17	46123642	0.0803808	0.994449	0	A	C	-0.126	0.003665	0.1363	0.123
rs9900074:46124326:G:C	17	46124326	0.0803808	0.999	0	G	C	0.1256	0.003706	-0.1381	0.1171
rs142300921:46115894:T:C	17	46115894	0.00551702	0.974	0	T	C	0.4587	0.003807	0.3286	0.3123
rs10491183:46122125:G:T	17	46122125	0.0793808	0.993449	0	G	T	0.1247	0.004142	-0.1397	0.1151
rs138514758:46117481:T:C	17	46117481	0.0793808	0.996483	0	T	C	-0.1244	0.004198	0.1393	0.1157
rs76001670:46121875:T:C	17	46121875	0.0793808	0.993966	0	T	C	-0.1244	0.004224	0.1393	0.1161
rs9903963:46121228:G:T	17	46121228	0.0793808	0.994966	0	G	T	0.1241	0.004316	-0.1389	0.1172
rs10491182:46120767:T:C	17	46120767	0.0793808	0.994966	0	T	C	-0.124	0.004337	0.1385	0.1182
rs12452399:46120533:C:T	17	46120533	0.0793808	0.995483	0	C	T	0.124	0.00434	-0.1384	0.1183
rs145428835:46119631:G:T	17	46119631	0.0793808	0.995966	0	G	T	0.1239	0.004355	-0.1382	0.1189
rs11079805:46118666:A:G	17	46118666	0.0793808	0.995966	0	A	G	-0.1239	0.004369	0.1379	0.1196
rs115228368:46117740:T:C	17	46117740	0.0793808	0.996483	0	T	C	-0.1238	0.004385	0.1377	0.1202
rs376874002:46117421:T:C	17	46117421	0.0793808	0.996483	0	T	C	-0.1238	0.004389	0.1376	0.1204
rs77225910:46115528:T:C	17	46115528	0.0793808	0.997483	0	T	C	-0.1237	0.004421	0.1371	0.1217
chr17_46110313_CTT_INDEL	17	46110312	0.0793808	1	1	CCTT	C	-0.1234	0.004501	0.1357	0.1253
rs35091825:46109428:T:C	17	46109428	0.0793808	1	0	T	C	-0.1234	0.004502	0.1357	0.1254
rs115217454:46107225:T:C	17	46107225	0.0793808	0.999	0	T	C	-0.1234	0.004506	0.1354	0.1264
rs374324897:46081286:GC:GCC	17	46081286	0.278585	0.993517	0	GC	GCC	-0.0763	0.004519	0.0843	0.1254
rs7209072	17	46110469	0.0793808	1	1	A	G	-0.1233	0.004533	0.1366	0.1228
rs11656818:46103237:C:A	17	46103237	0.0793808	0.998517	0	C	A	0.1232	0.004588	-0.135	0.1278
rs28405789:46101837:G:A	17	46101837	0.0793808	0.998	0	G	A	0.1228	0.004722	-0.1352	0.1272
rs9914123:46100871:C:T	17	46100871	0.0793808	0.998	0	C	T	0.1227	0.004756	-0.1352	0.1271
rs11651275:46098780:C:A	17	46098780	0.0793808	0.998	0	C	A	0.1226	0.004796	-0.1352	0.1272
rs41429650:46097878:G:A	17	46097878	0.0793808	0.997517	0	G	A	0.1226	0.004811	-0.1352	0.1272
rs9890096:46097083:T:C	17	46097083	0.0793808	0.997	0	T	C	-0.1225	0.004861	0.1343	0.1299
rs17679445:46022065:G:A	17	46022065	0.071483	0.999	0	G	A	0.1266	0.005675	-0.0745	0.4255
rs11651625	17	46006609	0.0838979	1	1	G	C	0.1174	0.005857	-0.0683	0.431
rs78317601:45986496:A:G	17	45986496	0.0828638	0.992517	0	A	G	-0.118	0.006027	0.0493	0.5734
17:45978607:G:A	17	45978607	0.000517025	0.643179	0	G	A	1.8616	0.006764	-1.2295	0.3173
rs16949676:46024500:G:C	17	46024500	0.0838979	0.996483	0	G	C	0.1149	0.006801	-0.0719	0.4056
rs72037996:46043986:CTT:C	17	46043986	0.272449	0.987966	0	CTT	C	-0.0732	0.006868	0.0827	0.1357
rs145345454:46018053:T:G	17	46018053	0.0530681	0.977585	0	T	G	0.1463	0.007443	-0.2347	0.03697
rs142022194:46091277:ACT:A	17	46091277	0.0029319	0.927768	0	ACT	A	-0.626	0.00754	0.9351	0.04526
rs4378657	17	46023694	0.0838979	1	1	G	A	0.1129	0.007901	-0.0694	0.4226
rs79515268:46023954:A:G	17	46023954	0.0838979	0.999483	0	A	G	-0.1126	0.008065	0.0693	0.4231
rs113352778:46099243:C:T	17	46099243	0.00096595	0.830093	0	C	T	-0.9071	0.009101	1.293	0.06352
rs192123848:46013386:G:A	17	46013386	0.018483	0.952694	0	G	A	0.2361	0.009374	-0.3178	0.08447
rs8067216:46088197:G:A	17	46088197	0.283	0.996517	0	G	A	0.0683	0.01047	-0.0791	0.1472
17:46072655:C:T	17	46072655	0.001	0.458084	0	C	T	-1.6232	0.01133	-0.0728	0.9526
rs151187155:46119320:TA:T	17	46119320	0.00096595	0.835849	0	TA	T	-0.8253	0.01148	1.0802	0.1028
rs142453313:46028688:G:T	17	46028688	0.019483	0.940972	0	G	T	0.2262	0.01211	-0.3262	0.07447
rs2905856:46085885:T:A	17	46085885	0.00144893	0.975523	0	T	A	-0.7004	0.01238	1.0955	0.05362
rs56216222:46107805:C:T	17	46107805	0.00144893	0.88174	0	C	T	-0.7616	0.01239	1.0996	0.07585
rs56116380:46089875:C:G	17	46089875	0.00144893	0.979796	0	C	G	0.6999	0.01314	-1.1282	0.04859
chr17_46066526_G_T	17	46066526	0.0525511	1	1	T	G	0.1312	0.01502	-0.1842	0.09743
rs79248788:45957357:T:G	17	45957357	0.00196595	0.864208	0	T	G	0.6573	0.01518	-0.9738	0.07686
rs190664417:46094268:T:G	17	46094268	0.005	0.397789	0	T	G	-0.6824	0.0154	0.2999	0.6024
17:46015142:C:G	17	46015142	0.00196595	0.827895	0	C	G	-0.6246	0.01562	0.3865	0.4448
rs11650615:46123698:C:G	17	46123698	0.277483	0.992	0	C	G	-0.0645	0.01649	0.0835	0.1294
rs62067380:46000406:T:C	17	46000406	0.15196	0.988068	0	T	C	0.0794	0.01791	-0.0147	0.8307
rs73985431:45962550:C:T	17	45962550	0.00144893	0.931155	0	C	T	-0.6248	0.02073	0.9799	0.07454
rs61521088:45966374:G:A	17	45966374	0.00144893	0.925502	0	G	A	-0.6203	0.0216	0.9735	0.07631
rs142027395:46124160:CTGCT:C	17	46124160	0.00603405	0.635702	0	CTGCT	C	-0.448	0.02176	0.5551	0.1656
rs60163848:45963839:A:T	17	45963839	0.00244893	0.929257	0	A	T	0.5566	0.02324	-0.9195	0.06513
rs140933797:46121692:G:A	17	46121692	0.00244893	0.965279	0	G	A	0.5013	0.02325	-0.3385	0.4363
rs2525101:46078662:A:T	17	46078662	0.00244893	0.940842	0	A	T	0.5807	0.02528	-0.7634	0.1449
rs73985430:45960639:C:T	17	45960639	0.00144893	0.931774	0	C	T	-0.6211	0.0282	1.1346	0.04832
rs60123006:45981919:G:A	17	45981919	0.184443	0.992551	0	G	A	-0.0682	0.02843	0.0068	0.9142
rs150662624:46092003:AC:A	17	46092003	0.00196595	0.968387	0	AC	A	-0.5908	0.02852	0.8384	0.1189
rs200993688:46158347:TATATATATAA:T	17	46158347	0.125483	0.997483	0	TATATATATAA	T	0.078	0.02942	-0.043	0.555
rs4794318	17	46028071	0.154858	1	1	G	A	-0.0725	0.0298	0.0603	0.3762
rs73321628:45977632:A:G	17	45977632	0.00196595	0.914127	0	A	G	0.5861	0.03113	-0.98	0.07593
rs73321625:45977502:A:T	17	45977502	0.00196595	0.91461	0	A	T	0.5851	0.03144	-0.9812	0.07559
rs73321620:45971373:A:T	17	45971373	0.00196595	0.916332	0	A	T	0.606	0.03197	-1.1134	0.05221
17:46083487:A:G	17	46083487	0.001	0.570194	0	A	G	-1.3618	0.03322	0.5127	0.6891
17:46031057:G:A	17	46031057	0.00748298	0.375461	0	G	A	0.5134	0.03379	0.0493	0.918
rs73321689:45984921:A:G	17	45984921	0.00196595	0.907025	0	A	G	0.5926	0.0352	-1.0806	0.0584
rs8073220:46145480:C:T	17	46145480	0.119415	0.999483	0	C	T	0.0763	0.03651	-0.064	0.3892
rs58848175:46043282:A:G	17	46043282	0.378483	0.994034	0	A	G	-0.0515	0.0368	0.0875	0.08199
rs12103808:46157596:A:G	17	46157596	0.119415	1	0	A	G	-0.0759	0.03759	0.0636	0.3918
rs11658242:46153580:A:G	17	46153580	0.119415	1	0	A	G	-0.0759	0.03761	0.0636	0.3918
17:46049056:C:T	17	46049056	0.000517025	0.56965	0	C	T	1.3924	0.03782	0.3968	0.7625
rs9909922:46141844:T:C	17	46141844	0.119415	1	0	T	C	-0.0757	0.03805	0.0634	0.3936
rs2597176:46059701:T:C	17	46059701	0.984034	0.996	0	T	C	-0.2009	0.03807	0.195	0.3245
rs12051	17	46103760	0.386585	1	1	A	G	-0.0507	0.03819	0.0975	0.05113
rs9905800:46149680:G:A	17	46149680	0.119415	1	0	G	A	0.0753	0.03918	-0.0634	0.3938
rs193042022:46099324:C:T	17	46099324	0.00251702	0.726436	0	C	T	0.6659	0.03942	-0.88	0.1717
17:45996368:TAC:T	17	45996368	0.18396	0.993068	0	TAC	T	-0.0636	0.04116	0.025	0.6945
rs8065797:46126265:C:G	17	46126265	0.119415	0.999	0	C	G	-0.0744	0.0416	0.0573	0.4406
rs11871969:45992622:G:A	17	45992622	0.18396	0.993551	0	G	A	-0.0633	0.0422	0.0161	0.8003
rs201187383:45978813:G:GT	17	45978813	0.00444893	0.749685	0	G	GT	0.4256	0.04267	-0.6769	0.1199
rs147117201:46044282:T:G	17	46044282	0.005	0.948415	0	T	G	0.3573	0.04298	0.3992	0.2697
rs143423898:46132564:AG:A	17	46132564	0.119415	1	0	AG	A	0.0737	0.04331	-0.0606	0.415
rs9898218:46106634:G:T	17	46106634	0.387068	0.999483	0	G	T	0.0492	0.04455	-0.0979	0.05032
rs8067470	17	46128122	0.119415	1	1	A	G	-0.0731	0.04527	0.0595	0.4229
rs78054593:45957499:C:T	17	45957499	0.0579256	0.97917	0	C	T	-0.1053	0.04534	-0.0499	0.6455
rs11654342:46126689:G:T	17	46126689	0.119415	0.998517	0	G	T	0.0728	0.04589	-0.0539	0.4677
rs74268095:46012017:AAAAAT:A	17	46012017	0.184994	0.997517	0	AAAAAT	A	-0.0611	0.04901	0.0252	0.6909
rs4794224	17	45957463	0.790279	1	1	T	C	-0.0579	0.04965	-0.0022	0.9705
rs2525100:46077882:G:A	17	46077882	0.00196595	0.911957	0	G	A	-0.5278	0.05055	0.8995	0.1008
rs8066225:46142858:T:G	17	46142858	0.00096595	0.976211	0	T	G	0.6881	0.05098	-0.9102	0.2043
rs192657182:45970217:C:T	17	45970217	0.005	0.982932	0	C	T	0.3175	0.05132	0.037	0.9119
rs199905768:45993959:C:A	17	45993959	0.025483	0.552285	0	C	A	0.1963	0.0534	-0.1125	0.587
rs141135915:46002454:G:A	17	46002454	0.005	0.934585	0	G	A	-0.3392	0.05371	-0.4286	0.2338
rs2597182:46062284:A:G	17	46062284	0.984034	0.997483	0	A	G	-0.1855	0.05412	0.1776	0.3665
rs2525089:46063524:A:G	17	46063524	0.984034	0.997483	0	A	G	-0.1851	0.05467	0.1773	0.3673
rs145808753:46062044:C:T	17	46062044	0.0185511	0.968551	0	C	T	-0.1763	0.05568	-0.0619	0.7443
rs117817179:46123055:C:A	17	46123055	0.004	0.943585	0	C	A	0.3715	0.05716	0.5098	0.22
rs6503897:45957049:A:G	17	45957049	0.80366	0.999	0	A	G	-0.0576	0.05757	0.0064	0.9177
rs11079799:45956073:A:G	17	45956073	0.790279	0.998	0	A	G	-0.0561	0.0577	-0.002	0.9742
rs187107340:46079340:G:A	17	46079340	0.00603405	0.926721	0	G	A	-0.3066	0.05951	0.2843	0.3952
rs11651753:46029089:C:T	17	46029089	0.448238	0.998	0	C	T	-0.0455	0.06062	-0.0264	0.5939
rs11649750:45950022:G:T	17	45950022	0.192858	0.971136	0	G	T	-0.0573	0.06336	0.0144	0.8197
rs2525095	17	46037277	0.481415	1	1	A	T	-0.0443	0.0643	0.015	0.7592
17:46082974:C:T	17	46082974	0.00251702	0.738802	0	C	T	0.5436	0.06451	0.2111	0.7204
rs144242505:46138787:A:G	17	46138787	0.004	0.946619	0	A	G	-0.3598	0.06566	-0.5215	0.2101
rs2325714:45953839:T:G	17	45953839	0.804142	0.995	0	T	G	-0.0558	0.06626	0.0048	0.9383
rs75221366:46128027:G:A	17	46128027	0.00148298	0.84126	0	G	A	0.5908	0.06964	0.2546	0.6989
rs79218616:45996777:A:T	17	45996777	0.00551702	0.690421	0	A	T	-0.3521	0.07065	0.5838	0.1358
rs2428607:46040536:A:G	17	46040536	0.995034	0.875461	0	A	G	0.3275	0.07079	0.0262	0.9448
rs191087287:46052171:G:A	17	46052171	0.00096595	0.889217	0	G	A	-0.7345	0.07164	0.3434	0.6684
rs2428608:46040795:C:T	17	46040795	0.543347	0.999517	0	C	T	0.0434	0.07309	0.0193	0.6964
rs66535122	17	46038448	0.545796	1	1	GC	G	0.0433	0.07408	0.0234	0.6369
rs188189052:46143142:G:A	17	46143142	0.00748298	0.968272	0	G	A	-0.2481	0.07442	-0.0202	0.9437
rs145329017:46143140:T:C	17	46143140	0.00748298	0.968272	0	T	C	0.2481	0.07442	0.0202	0.9437
17:46123777:A:C	17	46123777	0.00248298	0.628607	0	A	C	0.572	0.07589	-0.9024	0.1644
rs117966871:46116753:G:A	17	46116753	0.00151702	0.696368	0	G	A	-0.6745	0.07867	-0.2259	0.7687
chr17_46042365_A_T	17	46042365	0.542864	1	1	A	T	-0.0425	0.07948	-0.0193	0.6965
rs368005021:45972247:AAGG:A	17	45972247	0.010517	0.923551	0	AAGG	A	0.2134	0.08053	-0.0912	0.7173
rs2525109	17	46042327	0.542347	1	1	C	T	0.0423	0.08059	0.02	0.6861
rs149476176:45951250:CTCT:C	17	45951250	0.216102	0.978517	0	CTCT	C	-0.0519	0.0809	0.022	0.719
rs71377325:45982014:G:A	17	45982014	0.00244893	0.859019	0	G	A	-0.3965	0.0825	0.0748	0.8703
rs143611718:46030560:C:T	17	46030560	0.00451702	0.954517	0	C	T	0.3106	0.08702	-0.1042	0.7739
17:46111543:C:T	17	46111543	0.000517025	0.359387	0	C	T	1.39	0.08707	-1.6737	0.3289
rs192347894:46031318:G:C	17	46031318	0.005	0.983551	0	G	C	0.2806	0.08715	0.2072	0.537
rs138373764:46030089:G:A	17	46030089	0.00903405	0.960415	0	G	A	-0.223	0.08845	0.5045	0.06081
rs4793688:45948412:C:T	17	45948412	0.194858	0.955551	0	C	T	-0.0525	0.08914	0.0012	0.9843
17:46028225:C:CTTAT	17	46028225	0.001	0.328637	0	C	CTTAT	-1.0431	0.09049	-0.297	0.8123
rs184057508:46127490:G:A	17	46127490	0.00096595	0.705367	0	G	A	0.657	0.09058	-0.4611	0.5553
rs151283745:45973153:C:A	17	45973153	0.000482975	0.365995	0	C	A	-1.4809	0.09069	3.3116	0.05247
rs66515361:46038312:TA:T	17	46038312	0.56783	0.940585	0	TA	T	0.0424	0.09161	0.0167	0.744
rs2597177	17	46060529	0.346415	1	1	G	A	-0.0424	0.09171	0.0756	0.1409
rs74927342:46106263:G:A	17	46106263	0.003	0.833734	0	G	A	0.438	0.09188	-1.1772	0.03574
rs72840233:45988950:G:A	17	45988950	0.213932	0.993034	0	G	A	-0.0493	0.09277	0.1447	0.01596
rs147473894:46074199:G:A	17	46074199	0.003	0.937108	0	G	A	0.3953	0.09395	-0.0141	0.9756
17:46118723:A:T	17	46118723	0.00303405	0.625126	0	A	T	-0.4909	0.09686	0.8508	0.1696
17:46094669:T:C	17	46094669	0.00248298	0.531347	0	T	C	-0.4768	0.09726	-0.402	0.4948
rs17679651:46087426:T:C	17	46087426	0.00196595	0.901536	0	T	C	0.5101	0.1001	-0.7434	0.2155
rs146998127:46063829:ACT:A	17	46063829	0.00251702	0.281322	0	ACT	A	0.8916	0.1032	0.4654	0.6924
rs1468270	17	46125191	0.219932	1	1	C	T	0.0469	0.1033	-0.0903	0.1236
rs75483071:45949659:C:T	17	45949659	0.018034	0.955864	0	C	T	-0.1519	0.1042	-0.0427	0.8254
rs2525099:46077661:A:G	17	46077661	0.00196595	0.927883	0	A	G	0.4255	0.1045	-0.7413	0.1617
rs8071778	17	46080233	0.177381	1	1	G	C	0.0505	0.1052	-0.0137	0.8298
rs183952826:45998679:A:G	17	45998679	0.001	0.593245	0	A	G	0.7994	0.1057	-1.4945	0.1413
rs148039378:46067631:G:C	17	46067631	0.00751702	0.357641	0	G	C	0.3853	0.1108	-0.8505	0.08586
rs72833491:45981004:A:G	17	45981004	0.214932	0.992034	0	A	G	0.0467	0.1109	-0.1472	0.01415
17:45988915:C:T	17	45988915	0.012034	0.957483	0	C	T	-0.1835	0.112	-0.0889	0.709
rs181122870:45987336:C:A	17	45987336	0.000482975	0.361716	0	C	A	-1.4067	0.1124	2.9256	0.09326
rs75717806:46015108:G:A	17	46015108	0.204932	0.999	0	G	A	-0.0472	0.1128	0.1355	0.02623
rs139821389:45976071:A:G	17	45976071	0.00148298	0.322651	0	A	G	0.9736	0.1142	0.2732	0.8329
17:45999622:C:T	17	45999622	0.012034	0.960966	0	C	T	-0.1825	0.1149	-0.0311	0.8962
rs3764398:46018117:G:A	17	46018117	0.204932	0.999	0	G	A	-0.0469	0.1152	0.1346	0.02731
rs3794769:46131394:G:A	17	46131394	0.001	0.504711	0	G	A	-1.0061	0.1155	1.2141	0.3491
rs3190376:46002394:C:A	17	46002394	0.009	0.946551	0	C	A	0.2086	0.1155	-0.0642	0.8158
rs67498287:46088499:CT:C	17	46088499	0.365966	0.947	0	CT	C	-0.0399	0.1182	0.0662	0.2053
rs2525111:46042430:T:C	17	46042430	0.995517	0.996483	0	T	C	0.287	0.1183	0.1059	0.7829
rs199634607:46024900:C:CT	17	46024900	0.203966	0.951102	0	C	CT	-0.0475	0.1187	0.0825	0.1858
rs189402724:46092136:G:A	17	46092136	0.000517025	0.967381	0	G	A	0.6514	0.1196	0.9138	0.2817
rs4793741:46062560:A:G	17	46062560	0.122619	1	0	A	G	0.0569	0.1199	-0.0324	0.6645
rs149811876:46055419:A:AG	17	46055419	0.122619	0.999483	0	A	AG	0.0569	0.1199	-0.0325	0.6629
rs138006415:46117279:T:C	17	46117279	0.0164489	0.971477	0	T	C	-0.1467	0.1201	0.2465	0.1998
17:46065707:CTGTAG:C	17	46065707	0.005	0.940347	0	CTGTAG	C	0.2585	0.1208	0.1579	0.64
17:45961730:T:A	17	45961730	0.00203405	0.630368	0	T	A	0.4649	0.1211	-0.6137	0.3203
rs2525108:46041473:A:G	17	46041473	0.995517	0.996034	0	A	G	0.2834	0.1227	0.1039	0.7866
17:46034457:C:T	17	46034457	0.00148298	0.657487	0	C	T	0.5398	0.1227	0.5168	0.4585
rs7405753:46040409:A:T	17	46040409	0.995517	0.996034	0	A	T	0.2822	0.1242	0.1031	0.7882
rs187144300:45989095:C:T	17	45989095	0.011	0.867994	0	C	T	0.1887	0.1268	-0.1349	0.5962
rs7216411:46088944:C:T	17	46088944	0.806517	0.995	0	C	T	0.0465	0.1269	-0.084	0.1764
rs149951509:46126067:T:C	17	46126067	0.00955107	0.885687	0	T	C	0.1951	0.1282	0.253	0.3389
rs372248633:46004828:G:A	17	46004828	0.000482975	0.36125	0	G	A	1.3713	0.1287	-2.0427	0.297
rs189763890:46075991:C:T	17	46075991	0.005	0.949579	0	C	T	0.2577	0.1294	0.2863	0.4069
rs185910021:46150179:C:T	17	46150179	0.00451702	0.538319	0	C	T	0.3378	0.1311	-0.7968	0.07686
rs12951323:46027565:A:C	17	46027565	0.797932	0.997	0	A	C	0.0454	0.1315	-0.0644	0.2977
rs1986693	17	46026156	0.800415	1	1	A	G	0.0453	0.1328	-0.0591	0.3408
17:46070234:T:C	17	46070234	0.00096595	0.641686	0	T	C	-0.6208	0.1328	0.5825	0.4814
rs4794321:46028844:T:C	17	46028844	0.797932	0.997517	0	T	C	0.0451	0.1338	-0.0653	0.2915
rs4794333:46045495:T:C	17	46045495	0.397551	0.994034	0	T	C	-0.0366	0.1358	0.0615	0.2196
rs140302489:46098726:T:C	17	46098726	0.005	0.980306	0	T	C	-0.255	0.1378	-0.393	0.2676
rs146381669:46106465:G:A	17	46106465	0.002	0.461393	0	G	A	-0.6351	0.1386	0.8097	0.3667
chr17_46030753_G_T	17	46030753	0.018517	1	1	G	T	-0.1322	0.1397	-0.0541	0.7713
rs78947427:46097819:T:C	17	46097819	0.0231702	0.985721	0	T	C	0.1197	0.1401	0.1457	0.3832
rs189494213:46025106:G:T	17	46025106	0.004	0.885802	0	G	T	-0.2878	0.1409	0.6354	0.1122
rs17617010:46049533:C:T	17	46049533	0.122619	0.999483	0	C	T	-0.0538	0.1411	0.0343	0.646
rs886444	17	46051911	0.396585	1	1	G	A	0.036	0.1413	-0.0581	0.2449
rs73323378:46044912:A:C	17	46044912	0.122619	0.994966	0	A	C	0.0538	0.1425	-0.0307	0.6819
rs143921270:46124066:C:G	17	46124066	0.015966	0.96734	0	C	G	-0.1391	0.1427	0.2758	0.154
rs11434235:46142854:G:GT	17	46142854	0.631966	0.770898	0	G	GT	-0.0414	0.1428	0.0156	0.7866
rs147779202:46053640:G:A	17	46053640	0.013	0.386987	0	G	A	0.2505	0.143	-0.0513	0.885
rs55734605:46032330:T:TC	17	46032330	0.797932	0.998517	0	T	TC	0.0441	0.1431	-0.0638	0.3024
rs61463979:45954373:G:A	17	45954373	0.260653	0.982483	0	G	A	0.0408	0.144	-0.0179	0.7551
rs111730022:46074346:TTTAA:T	17	46074346	0.33466	0.659313	0	TTTAA	T	0.0474	0.1447	-0.0544	0.4119
rs149422445:45982360:A:T	17	45982360	0.0155511	0.871272	0	A	T	0.1528	0.1457	0.135	0.5338
17:45955044:G:A	17	45955044	0.00451702	0.461743	0	G	A	0.3893	0.1479	-0.5482	0.3171
rs6847:46147807:T:A	17	46147807	0.225449	0.999	0	T	A	0.0413	0.1482	-0.0851	0.1434
rs138125040:46104166:G:A	17	46104166	0.00896595	0.74017	0	G	A	0.2107	0.1501	-0.2317	0.4394
rs72833487:45972980:G:A	17	45972980	0.0186532	0.936749	0	G	A	-0.1302	0.1509	0.1744	0.3471
17:45984672:C:T	17	45984672	0.001	0.494366	0	C	T	-0.7935	0.1517	1.0864	0.3411
rs113962925:46044446:C:T	17	46044446	0.0846192	0.987034	0	C	T	-0.0619	0.1539	-0.0314	0.7217
rs143469518:46040327:G:A	17	46040327	0.0271362	0.978381	0	G	A	-0.1058	0.1551	0.0013	0.9932
rs77255138:45972417:T:G	17	45972417	0.506789	0.786068	0	T	G	0.0384	0.1556	0.0445	0.42
rs2285863:46125978:C:G	17	46125978	0.224449	0.999	0	C	G	-0.0405	0.157	0.0834	0.1521
rs139297106:46081192:C:T	17	46081192	0.00196595	0.930796	0	C	T	-0.3579	0.159	0.0578	0.9054
rs4239170:45967278:T:C	17	45967278	0.996034	0.955932	0	T	C	0.276	0.1592	0.2945	0.4734
rs9747001:46154669:G:A	17	46154669	0.224449	1	0	G	A	0.0402	0.1594	-0.089	0.1259
rs58624511:46158908:C:G	17	46158908	0.224449	1	0	C	G	-0.0402	0.1594	0.089	0.1259
rs35083105:46156351:CA:C	17	46156351	0.224449	1	0	CA	C	-0.0402	0.1594	0.089	0.1259
rs12949879:46158050:T:C	17	46158050	0.224449	1	0	T	C	-0.0402	0.1594	0.089	0.1259
rs71298798:46142656:T:TTAACA	17	46142656	0.224449	1	0	T	TTAACA	-0.0402	0.1595	0.0898	0.1228
rs35202025:46152717:A:G	17	46152717	0.224449	1	0	A	G	-0.0402	0.1595	0.089	0.1259
rs146011627:46152715:T:TC	17	46152715	0.224449	1	0	T	TC	-0.0402	0.1595	0.089	0.1259
rs2240122:46152559:C:A	17	46152559	0.224449	1	0	C	A	0.0402	0.1596	-0.089	0.1259
rs7224014:46150861:T:G	17	46150861	0.224449	1	0	T	G	-0.0402	0.1598	0.0891	0.1258
rs11655407:46151046:A:G	17	46151046	0.224449	1	0	A	G	-0.0402	0.1598	0.0891	0.1258
rs58595405:46149404:C:G	17	46149404	0.224449	1	0	C	G	-0.0401	0.16	0.0891	0.1257
rs11651097:46147039:T:C	17	46147039	0.224449	1	0	T	C	-0.0401	0.1604	0.0891	0.1256
rs11649995:46146955:A:G	17	46146955	0.224449	1	0	A	G	-0.0401	0.1604	0.0891	0.1256
rs8078125:46145709:T:G	17	46145709	0.224449	1	0	T	G	-0.0401	0.1606	0.0891	0.1256
rs11649919:46146820:A:G	17	46146820	0.224449	1	0	A	G	-0.0401	0.1607	0.0889	0.1263
rs113516984:45964442:T:C	17	45964442	0.217619	0.997517	0	T	C	-0.0412	0.1608	0.0445	0.4607
rs7217496:46154202:A:G	17	46154202	0.224966	0.998483	0	A	G	-0.04	0.161	0.0899	0.1225
rs11079806	17	46142680	0.223449	1	1	G	A	0.0401	0.161	-0.0929	0.1105
rs2051821:46143515:T:C	17	46143515	0.224449	1	0	T	C	-0.04	0.1612	0.0891	0.1255
rs58203448:46141276:C:T	17	46141276	0.224449	1	0	C	T	0.0398	0.1633	-0.0889	0.1264
rs11870852:45978111:C:T	17	45978111	0.350789	0.993551	0	C	T	-0.0351	0.1639	-0.0368	0.4743
rs875066:46139732:T:G	17	46139732	0.224449	1	0	T	G	-0.0396	0.1654	0.0886	0.1277
rs875065:46139569:C:T	17	46139569	0.224449	1	0	C	T	0.0393	0.1689	-0.0893	0.1249
rs72833488:45973130:C:T	17	45973130	0.0186532	0.936749	0	C	T	-0.1243	0.1694	0.1572	0.3959
rs73327306:46126158:G:A	17	46126158	0.038483	0.996	0	G	A	-0.0845	0.1699	0.17	0.1748
17:46150615:A:G	17	46150615	0.000482975	0.636716	0	A	G	-0.6781	0.1701	1.2953	0.193
rs4794261:45982346:C:G	17	45982346	0.350306	0.994551	0	C	G	0.0344	0.1718	0.038	0.4604
17:46040534:C:G	17	46040534	0.004	0.66283	0	C	G	-0.3104	0.1722	-0.0243	0.958
rs145435389:45971519:GTC:G	17	45971519	0.197585	0.995517	0	GTC	G	0.0415	0.1724	-0.0583	0.3504
rs60312877:46134236:A:ACT	17	46134236	0.224449	1	0	A	ACT	-0.0389	0.1731	0.0876	0.1322
rs191329785:46094623:G:T	17	46094623	0.00148298	0.955666	0	G	T	0.4191	0.1733	-0.3765	0.538
rs80076843:46149737:T:C	17	46149737	0.0241702	0.98917	0	T	C	0.1079	0.1739	0.1348	0.4086
rs1108833:45982797:G:A	17	45982797	0.350789	0.994034	0	G	A	-0.0343	0.174	-0.0377	0.4633
rs34750858:46132937:T:A	17	46132937	0.224449	1	0	T	A	0.0388	0.1746	-0.0873	0.1333
rs7212202:46132723:G:C	17	46132723	0.224449	1	0	G	C	0.0388	0.1749	-0.0873	0.1335
rs147467124:45996394:T:TAC	17	45996394	0.0181702	0.908783	0	T	TAC	0.1272	0.1764	-0.1601	0.4061
rs61197535:46144136:A:C	17	46144136	0.038966	0.999	0	A	C	0.0827	0.1772	-0.1838	0.141
rs112628589:46145579:A:C	17	46145579	0.038966	1	0	A	C	0.0826	0.1775	-0.1841	0.1403
rs112224454:46146521:C:T	17	46146521	0.038966	1	0	C	T	-0.0826	0.1775	0.1841	0.1403
chr17_46151952_AAGG_INDEL	17	46151951	0.038966	1	1	AAAGG	A	-0.0826	0.1775	0.1841	0.1403
rs72833470:45950721:A:G	17	45950721	0.258653	0.976483	0	A	G	-0.0378	0.1779	0.0033	0.9541
rs12936731	17	46128359	0.224449	1	1	G	C	0.0385	0.1779	-0.0866	0.1367
rs75919935:46146281:C:A	17	46146281	0.00096595	0.656419	0	C	A	-0.5996	0.1781	0.715	0.407
rs12450620:46130254:G:T	17	46130254	0.224449	1	0	G	T	0.0384	0.1785	-0.0868	0.1356
rs11654010	17	45960865	0.352306	1	1	T	C	0.0338	0.1788	0.0341	0.5058
rs35336840:45966108:A:G	17	45966108	0.352306	0.997034	0	A	G	0.0338	0.179	0.0334	0.515
rs111910082:46141154:C:T	17	46141154	0.038966	0.999483	0	C	T	-0.0823	0.179	0.1841	0.1402
rs143783382:46081919:C:T	17	46081919	0.000482975	0.398759	0	C	T	-1.0321	0.1791	0.3665	0.8148
rs7211859:45986282:C:A	17	45986282	0.350306	0.994551	0	C	A	-0.0339	0.1792	-0.0385	0.454
rs112176137:46140309:G:A	17	46140309	0.038966	0.999483	0	G	A	-0.0823	0.1792	0.1841	0.1403
rs9899275	17	46129315	0.224449	1	1	C	T	0.0383	0.1797	-0.0866	0.1364
rs10711107:46132939:TG:T	17	46132939	0.224449	0.999	0	TG	T	0.0383	0.1799	-0.0872	0.134
17:46137541:C:CG	17	46137541	0.0246873	0.969687	0	C	CG	-0.1061	0.1799	-0.1175	0.4705
rs112232483:45956812:CTTTTTGTTTT:C	17	45956812	0.275068	0.967102	0	CTTTTTGTTTT	C	-0.037	0.1801	0.0146	0.7959
rs61422354:45969809:A:G	17	45969809	0.352306	0.995551	0	A	G	0.0337	0.1812	0.0336	0.5136
rs60580012:45969808:C:T	17	45969808	0.352306	0.995551	0	C	T	-0.0337	0.1812	-0.0336	0.5137
17:46110861:G:A	17	46110861	0.00148298	0.894551	0	G	A	-0.3859	0.1813	0.5568	0.3342
rs138575974:45974058:T:G	17	45974058	0.00596595	0.962783	0	T	G	0.2072	0.1816	-0.1817	0.5532
rs72823513:46048920:A:G	17	46048920	0.200068	0.983068	0	A	G	-0.0407	0.1818	0.0736	0.24
rs138977289:46122888:G:A	17	46122888	0.014	0.448892	0	G	A	-0.2068	0.1824	-0.0562	0.8599
rs142460619:45980004:G:C	17	45980004	0.00596595	0.964266	0	G	C	-0.2065	0.1825	0.1851	0.5454
rs148441447:46060276:C:G	17	46060276	0.000482975	0.495794	0	C	G	-0.9098	0.1844	1.9706	0.1452
rs55822955:45961813:A:G	17	45961813	0.433687	0.997034	0	A	G	0.0322	0.1853	0.068	0.1697
rs72833466:45948952:C:A	17	45948952	0.258136	0.975	0	C	A	0.0371	0.1866	0.0002	0.9967
rs17616603:45959620:T:C	17	45959620	0.352306	0.998517	0	T	C	0.0331	0.1881	0.0347	0.4986
17:46072667:G:T	17	46072667	0.001	0.92226	0	G	T	-0.5339	0.1895	0.6184	0.478
chr17_45960449_A_G	17	45960449	0.217585	1	1	G	A	0.0385	0.1902	-0.0458	0.4469
rs11650044:45958009:T:C	17	45958009	0.996034	0.95187	0	T	C	0.2572	0.1906	0.2658	0.5181
17:46151186:CAAA:C	17	46151186	0.335381	0.972932	0	CAAA	C	-0.0336	0.1906	0.033	0.5278
rs375428999:45949509:CAGGT:C	17	45949509	0.258136	0.975483	0	CAGGT	C	-0.0367	0.1911	0.0005	0.9936
rs150160489:46132532:C:CTAAAG	17	46132532	0.0226873	0.980204	0	C	CTAAAG	-0.1067	0.1913	-0.156	0.354
rs5820682:46150487:T:TA	17	46150487	0.225449	0.995034	0	T	TA	-0.0373	0.1914	0.093	0.1099
rs143941133:46128198:C:T	17	46128198	0.00196595	0.846985	0	C	T	-0.4051	0.1914	1.649	0.00891
rs4794286:45990597:T:C	17	45990597	0.352306	0.987551	0	T	C	0.0328	0.1934	0.0355	0.4907
rs9899461	17	46129353	0.224449	1	1	C	T	0.0371	0.1941	-0.0874	0.1331
rs4793733:46033982:G:A	17	46033982	0.333238	1	0	G	A	-0.0331	0.1942	-0.0045	0.9311
rs4793731:46033693:G:A	17	46033693	0.333238	1	0	G	A	-0.0331	0.1943	-0.0044	0.9321
rs141857586:45963045:G:A	17	45963045	0.000482975	0.624057	0	G	A	-0.6631	0.1948	-0.6654	0.5343
chr17_46080586_C_G	17	46080586	0.379136	1	1	G	C	-0.0318	0.1949	0.015	0.7636
rs757351	17	46081041	0.378653	1	1	G	T	-0.0317	0.1964	0.0208	0.6769
rs60736523:46117951:C:T	17	46117951	0.00351702	0.869043	0	C	T	0.2939	0.1979	-0.2279	0.6172
exm1332982	17	46023295	0.00196595	1	1	C	G	0.3626	0.1981	-0.3733	0.4903
chr17_46035011_C_G	17	46035011	0.333721	1	1	C	G	0.0327	0.199	0.0048	0.9258
rs12602494:46037607:G:A	17	46037607	0.333721	1	0	G	A	-0.0326	0.2003	-0.005	0.923
rs185690469:45968791:C:A	17	45968791	0.00251702	0.5886	0	C	A	0.4184	0.2006	-0.3892	0.566
rs117284771:46053767:C:G	17	46053767	0.0281362	0.984102	0	C	G	0.0931	0.2007	-0.0281	0.8501
rs4794332:46040567:C:G	17	46040567	0.336204	0.999517	0	C	G	0.0323	0.2029	0.002	0.969
rs56109359:46060011:A:G	17	46060011	0.0150681	0.92117	0	A	G	-0.1321	0.2038	-0.0022	0.9917
rs5820673:45970746:G:GA	17	45970746	0.44683	0.962687	0	G	GA	-0.0311	0.2039	0.0855	0.08751
rs59493350	17	46143800	0.038966	1	1	G	A	-0.0777	0.2046	0.1836	0.141
rs148824303:46040223:T:C	17	46040223	0.00151702	0.267415	0	T	C	-1.8622	0.2049	0.7335	0.8069
rs190271018:46100954:G:C	17	46100954	0.001	0.655755	0	G	C	0.6366	0.2076	0.3939	0.7098
rs184615444:46073626:G:C	17	46073626	0.001	0.661749	0	G	C	-0.562	0.2078	0.0455	0.9596
rs882163	17	46093539	0.416932	1	1	C	T	-0.0301	0.2143	0.0647	0.1895
rs58460102:46041125:C:CT	17	46041125	0.482347	0.927932	0	C	CT	0.0311	0.2146	0.0321	0.5301
17:46050112:C:T	17	46050112	0.00403405	0.761613	0	C	T	-0.2729	0.2146	0.8156	0.0732
rs10579563:46043437:GGAAA:G	17	46043437	0.337687	0.981517	0	GGAAA	G	-0.0318	0.2148	0.0072	0.8904
rs188353596:46078602:C:T	17	46078602	0.006	0.959279	0	C	T	-0.1949	0.2159	-0.1933	0.5459
rs144269654:46037773:G:A	17	46037773	0.017517	0.993517	0	G	A	-0.1126	0.2166	-0.0255	0.8932
rs111326118:46011475:C:G	17	46011475	0.00955107	0.908721	0	C	G	-0.1564	0.2172	-0.695	0.006599
17:46100770:C:T	17	46100770	0.0160681	0.964619	0	C	T	0.1216	0.2182	-0.0134	0.9474
rs186447258:45958095:C:T	17	45958095	0.00951702	0.864762	0	C	T	-0.1676	0.2187	-0.1711	0.5371
rs139226501:46001087:G:C	17	46001087	0.0150681	0.954238	0	G	C	0.1254	0.2187	0.0304	0.8847
17:46004894:T:C	17	46004894	0.0150681	0.954238	0	T	C	-0.1254	0.2189	-0.0304	0.8847
rs79334728:46120643:C:G	17	46120643	0.011034	0.942926	0	C	G	-0.1419	0.2203	-0.5903	0.012
rs5820676:46078793:CA:C	17	46078793	0.482585	0.905687	0	CA	C	0.0306	0.2206	-0.0385	0.4507
rs56273045:46029215:T:C	17	46029215	0.012034	0.805675	0	T	C	-0.1477	0.222	0.0839	0.731
chr17_46064919_C_T	17	46064919	0.0181021	1	1	C	T	0.1124	0.2224	-0.0905	0.6337
rs11312722:46085758:CA:C	17	46085758	0.139898	0.863551	0	CA	C	0.0452	0.2228	-0.0556	0.4618
17:46078261:T:C	17	46078261	0.00596595	0.799783	0	T	C	0.2165	0.2234	-0.4557	0.2087
rs113522836:46035443:C:G	17	46035443	0.0105511	0.955136	0	C	G	-0.1431	0.2244	-0.6403	0.007542
rs8065110:45972411:T:G	17	45972411	0.305068	0.653034	0	T	G	-0.039	0.2247	0.1084	0.09773
rs4793737	17	46042257	0.336204	1	1	A	C	0.0308	0.2247	0.0028	0.9574
rs2597170:46034247:A:G	17	46034247	0.995517	0.992415	0	A	G	0.228	0.2294	0.202	0.6119
chr17_45976565_C_T	17	45976565	0.00196595	1	1	T	C	0.3455	0.2294	-0.1588	0.7757
rs3833856:46030644:T:TG	17	46030644	0.334238	1	0	T	TG	0.0306	0.23	0.0018	0.9721
rs149172670:46107389:C:T	17	46107389	0.016483	0.964415	0	C	T	0.1137	0.2329	-0.128	0.5131
rs2069295:45995891:C:G	17	45995891	0.0276532	0.981443	0	C	G	0.0873	0.2349	0.0424	0.7781
rs117232302:46134227:G:A	17	46134227	0.001	0.494588	0	G	A	0.6355	0.2354	-0.2978	0.7887
rs146204978:46022191:T:A	17	46022191	0.001	0.787702	0	T	A	0.4857	0.2375	0.2011	0.8046
rs74683156:46019606:G:A	17	46019606	0.0213808	0.991	0	G	A	0.0991	0.238	0.1019	0.5599
rs34485742:46097049:CA:C	17	46097049	0.541966	0.74583	0	CA	C	0.0325	0.2396	-0.0594	0.2913
rs55919254:46146663:T:A	17	46146663	0.243966	0.935068	0	T	A	0.0337	0.24	-0.0869	0.1367
17:46116901:T:G	17	46116901	0.00448298	0.732443	0	T	G	-0.2716	0.2401	0.4032	0.4034
rs9894188:46044031:C:T	17	46044031	0.60683	0.996517	0	C	T	0.0287	0.2402	-0.0404	0.4172
rs138361282:45965172:G:A	17	45965172	0.00244893	0.768827	0	G	A	-0.2563	0.2424	-0.3359	0.4452
rs10717827:46102198:CT:C	17	46102198	0.748102	0.999	0	CT	C	-0.0323	0.2424	0.0833	0.1398
rs200328340:46152331:A:G	17	46152331	0.00548298	0.85766	0	A	G	0.2086	0.2485	-0.6164	0.09269
rs61396871:46028160:C:T	17	46028160	0.115	0.997517	0	C	T	-0.043	0.2521	-0.0531	0.4853
rs1476579:46070431:C:T	17	46070431	0.0145511	0.949517	0	C	T	0.1184	0.2522	-0.0493	0.8165
rs2597166:46072665:G:A	17	46072665	0.618898	0.998	0	G	A	0.0281	0.2528	-0.0036	0.9423
rs2325715:45952785:A:G	17	45952785	0.996517	0.955313	0	A	G	0.2495	0.2541	0.2983	0.5167
rs17616799	17	46039553	0.115	1	1	A	G	0.0426	0.2548	0.0483	0.5243
rs3826396:46032804:C:A	17	46032804	0.210381	0.996517	0	C	A	-0.0335	0.2553	0.0919	0.1272
17:46095372:G:T	17	46095372	0.00148298	0.96134	0	G	T	-0.3282	0.2553	0.1022	0.8605
rs1986694	17	46026031	0.104517	1	1	G	C	-0.0444	0.256	-0.0719	0.3656
chr17_46029432_G_T	17	46029432	0.334238	1	1	T	G	0.0289	0.2564	0.0023	0.964
rs4794331:46040395:T:G	17	46040395	0.209898	0.996517	0	T	G	0.0333	0.2577	-0.0869	0.1495
rs150624334:46040603:TTTCAGACTTCAAGCC:T	17	46040603	0.334238	0.999517	0	TTTCAGACTTCAAGCC	T	-0.0286	0.2613	-0.003	0.9547
rs34047980:46151582:C:CTG	17	46151582	0.00151702	0.723603	0	C	CTG	-0.4632	0.2615	-0.368	0.6537
rs56402159:46031322:T:G	17	46031322	0.115	0.997517	0	T	G	0.042	0.2622	0.0541	0.4765
rs148072893:46055047:C:T	17	46055047	0.00448298	0.676904	0	C	T	-0.264	0.2625	0.1602	0.7405
17:46054522:G:A	17	46054522	0.00448298	0.676904	0	G	A	-0.264	0.2625	0.1602	0.7405
rs190512732:45965872:T:G	17	45965872	0.000482975	0.364433	0	T	G	-1.0086	0.2626	1.4564	0.4596
17:46008587:T:TA	17	46008587	0.00648298	0.885368	0	T	TA	0.1737	0.2629	-0.1347	0.6631
rs188766766:45991716:A:G	17	45991716	0.004	0.899232	0	A	G	0.2318	0.2631	-0.8065	0.06038
rs183816482:46146647:A:T	17	46146647	0.00551702	0.902028	0	A	T	0.1938	0.2631	-0.2507	0.4829
rs183012650:45991715:C:T	17	45991715	0.004	0.899232	0	C	T	-0.2318	0.2631	0.8065	0.06039
17:46037844:A:G	17	46037844	0.00251702	0.822932	0	A	G	-0.3218	0.2639	-0.8312	0.1442
rs2325749:46024973:C:A	17	46024973	0.333204	0.993517	0	C	A	-0.0285	0.2658	-0.0173	0.7407
rs8076163:46120325:T:C	17	46120325	0.805034	0.991551	0	T	C	-0.0337	0.2676	0.0529	0.3933
rs75050985:46004625:C:T	17	46004625	0.004	0.660953	0	C	T	-0.2528	0.2681	-0.3641	0.4422
rs4794401:46118534:A:T	17	46118534	0.804034	0.989551	0	A	T	-0.0336	0.2687	0.0565	0.3619
rs80226508:45958054:T:C	17	45958054	0.0484489	0.965068	0	T	C	0.0629	0.2692	0.0656	0.5684
rs57768342:46028625:G:A	17	46028625	0.210381	0.995	0	G	A	-0.0326	0.2693	0.095	0.1153
rs12944587:45993200:C:G	17	45993200	0.00244893	0.983796	0	C	G	0.2548	0.2695	-0.0015	0.9973
rs200409765:46053203:G:A	17	46053203	0.00251702	0.833449	0	G	A	0.3111	0.2697	0.7881	0.1594
rs1317850:46121839:T:C	17	46121839	0.805034	0.990551	0	T	C	-0.0335	0.2714	0.0547	0.3785
rs8065112:45972415:T:G	17	45972415	0.301068	0.660034	0	T	G	-0.0352	0.2723	0.1047	0.1089
rs200774151:46141804:A:AT	17	46141804	0.001	0.664164	0	A	AT	0.4905	0.2725	-0.0148	0.9867
rs72823509:46044589:G:A	17	46044589	0.197585	0.994517	0	G	A	0.0334	0.2727	-0.0519	0.4065
rs2525106:46041103:G:C	17	46041103	0.995034	0.996517	0	G	C	-0.182	0.2732	-0.1004	0.771
rs147114188:46132988:G:A	17	46132988	0.000482975	0.39997	0	G	A	-0.9051	0.2733	-1.1571	0.4715
rs75897047:45974494:C:T	17	45974494	0.0346532	0.959687	0	C	T	-0.0728	0.2739	0.0619	0.6481
rs11403605:46001705:A:AT	17	46001705	0.996034	0.975415	0	A	AT	0.2138	0.2742	0.2912	0.4781
rs12602894:45998014:T:C	17	45998014	0.996034	0.975415	0	T	C	0.2133	0.2753	0.2908	0.4786
rs35261895:46053905:A:G	17	46053905	0.00651702	0.917858	0	A	G	0.179	0.2761	-0.2992	0.3776
17:45968313:A:G	17	45968313	0.000517025	0.703865	0	A	G	-0.7465	0.2767	-0.709	0.5902
rs71366821:46144855:TA:T	17	46144855	0.0881362	0.540096	0	TA	T	0.0622	0.2785	-0.2011	0.08632
rs184660340:46042941:T:G	17	46042941	0.000482975	0.877542	0	T	G	-0.4812	0.2804	0.775	0.3909
17:46094663:G:A	17	46094663	0.00448298	0.852517	0	G	A	-0.2066	0.2827	0.7557	0.05422
17:46044308:C:CTTTTTTCTTTTT	17	46044308	0.502864	0.836721	0	C	CTTTTTTCTTTTT	0.028	0.2827	-0.0851	0.1095
17:46079573:CAATAAAATAA:CAATAA	17	46079573	0.396966	0.998483	0	CAATAAAATAA	CAATAA	-0.0261	0.2832	0.0183	0.7117
17:46079573:CAATAAAATAA:CAATAAAATAAAATAA	17	46079573	0.0876192	0.967102	0	CAATAAAATAA	CAATAAAATAAAATAA	0.0457	0.289	0.038	0.6645
rs146192866:46067982:A:C	17	46067982	0.010034	0.822539	0	A	C	0.1423	0.2895	-0.1361	0.6274
17:45973914:C:T	17	45973914	0.00251702	0.652375	0	C	T	0.3291	0.2911	-0.399	0.5364
17:46142996:C:T	17	46142996	0.00151702	0.827319	0	C	T	-0.406	0.2912	-0.046	0.9552
17:45949686:C:A	17	45949686	0.001	0.566975	0	C	A	0.4468	0.2919	0.1008	0.906
rs117441019:45948939:T:C	17	45948939	0.00248298	0.94183	0	T	C	-0.2476	0.2926	-0.0385	0.9378
rs11554926:46147724:A:C	17	46147724	0.00651702	0.936375	0	A	C	0.1684	0.2968	-0.2647	0.4228
rs2256020	17	46050635	0.196	1	1	T	C	0.0314	0.2972	-0.0739	0.2304
chr17_46086504_C_T	17	46086504	0.377653	1	1	C	T	-0.0255	0.2977	0.0241	0.63
rs16949651	17	46019601	0.128932	1	1	A	G	0.0368	0.3011	0.0338	0.6394
rs186610136:46142265:A:T	17	46142265	0.00851702	0.965551	0	A	T	0.132	0.302	-0.0005	0.9984
rs1808209:46140291:C:T	17	46140291	0.849483	0.998	0	C	T	0.0343	0.3025	-0.074	0.2767
rs115925051:46144005:C:A	17	46144005	0.00344893	0.755963	0	C	A	-0.2064	0.3031	0.1909	0.6356
rs5820679:46097404:GT:G	17	46097404	0.748102	0.995034	0	GT	G	0.0286	0.3032	-0.0782	0.1668
rs375834257:46006255:T:C	17	46006255	0.00251702	0.909619	0	T	C	0.2579	0.3041	0.5949	0.2464
rs141803094:46006688:T:C	17	46006688	0.00251702	0.909619	0	T	C	0.2579	0.3041	0.5949	0.2464
rs2525104	17	46084026	0.776687	1	1	G	A	0.0295	0.3047	-0.1073	0.06778
chr17_46079756_A_G	17	46079756	0.396966	1	1	G	A	-0.0249	0.3052	0.0186	0.708
rs2597175:46086911:C:A	17	46086911	0.377653	1	0	C	A	-0.0251	0.3066	0.0223	0.6552
rs143789223:45998722:C:G	17	45998722	0.001	0.577702	0	C	G	0.5314	0.3071	0.441	0.6661
rs117449497:46031105:G:T	17	46031105	0.008	0.972204	0	G	T	-0.1323	0.3074	0.1148	0.6626
rs10853093	17	46153747	0.849483	1	1	G	A	0.0338	0.3079	-0.0704	0.2989
rs9905460:46156072:C:G	17	46156072	0.82117	1	0	C	G	-0.0316	0.3081	0.0813	0.2006
rs12103663:46155800:T:C	17	46155800	0.82117	1	0	T	C	-0.0316	0.3085	0.0813	0.2008
rs8079982:46127756:G:A	17	46127756	0.178347	0.999	0	G	A	-0.0315	0.3101	0.0773	0.2246
rs6503985	17	46102157	0.361034	1	1	C	T	-0.0253	0.3102	0.0342	0.5007
rs2158341:46158533:T:C	17	46158533	0.848966	1	0	T	C	-0.0337	0.3103	0.0703	0.2999
rs8182234:46139209:T:G	17	46139209	0.82117	1	0	T	G	-0.0315	0.3112	0.0804	0.2061
rs111514452:46037570:C:T	17	46037570	0.00448298	0.938823	0	C	T	0.1784	0.3117	0.9762	0.006161
17:45956819:T:G	17	45956819	0.012	0.906557	0	T	G	-0.1128	0.3117	0.4112	0.0738
rs145119723:46007239:G:A	17	46007239	0.000482975	0.934994	0	G	A	-0.4606	0.3135	0.5014	0.5665
rs757352	17	46097153	0.804034	1	1	A	G	-0.0304	0.3144	0.0504	0.4141
rs185681588:45977274:G:A	17	45977274	0.00551702	0.909579	0	G	A	0.1731	0.3159	0.0721	0.8404
rs60118365:46095001:AAAGAGG:A	17	46095001	0.804034	0.998	0	AAAGAGG	A	0.0303	0.3169	-0.0567	0.3586
rs6503984:46102156:G:T	17	46102156	0.361034	1	0	G	T	-0.0249	0.317	0.0341	0.5025
rs143839409:46152093:A:T	17	46152093	0.00848298	0.902972	0	A	T	0.1406	0.3171	-0.3676	0.2004
17:46140905:A:AG	17	46140905	0.0274149	0.984068	0	A	AG	-0.0726	0.3185	0.177	0.2328
rs11870317:46141292:A:G	17	46141292	0.82117	0.999517	0	A	G	-0.0309	0.3191	0.0799	0.2087
rs3834971:46124994:ACCGCCAACGTT:A	17	46124994	0.150864	0.977551	0	ACCGCCAACGTT	A	0.0333	0.3195	0.0003	0.9961
rs55698947:46086921:T:C	17	46086921	0.0308979	0.979619	0	T	C	-0.0687	0.3202	0.1335	0.3433
chr17_46091444_C_T	17	46091444	0.37717	1	1	T	C	0.0243	0.3227	-0.0261	0.6021
17:45951221:T:C	17	45951221	0.00248298	0.954625	0	T	C	-0.2316	0.3273	-0.0891	0.8577
17:46122325:A:T	17	46122325	0.001	0.62747	0	A	T	-0.6616	0.3276	0.0454	0.9746
17:46045137:A:G	17	46045137	0.0179319	0.89904	0	A	G	-0.0906	0.3276	0.1917	0.3069
rs111671883:46132578:G:A	17	46132578	0.0105511	0.96334	0	G	A	0.1151	0.3324	0.6431	0.007723
rs57782323:46043524:A:G	17	46043524	0.117517	0.994483	0	A	G	0.0359	0.3345	0.0597	0.4285
rs34273685:46040647:C:CT	17	46040647	0.312687	0.953898	0	C	CT	-0.0255	0.3375	0.0024	0.9652
rs113273062:45993386:G:A	17	45993386	0.00448298	0.934789	0	G	A	0.166	0.3426	0.922	0.009135
rs192826641:46036366:G:A	17	46036366	0.002	0.748938	0	G	A	-0.2855	0.344	0.237	0.7035
rs11655047:46101949:G:T	17	46101949	0.039034	0.998517	0	G	T	-0.059	0.3443	0.1131	0.3727
rs187330194:45967936:T:C	17	45967936	0.00248298	0.974728	0	T	C	-0.2207	0.3448	-0.0755	0.8777
rs78113475:46118802:G:T	17	46118802	0.039034	0.995	0	G	T	-0.0589	0.3461	0.1304	0.3053
rs112789760:46078120:C:T	17	46078120	0.00851702	0.923062	0	C	T	-0.1317	0.3461	-0.3054	0.2935
rs199942089:46146053:T:C	17	46146053	0.00296595	0.905885	0	T	C	-0.2137	0.3465	-0.3225	0.4828
17:46110826:C:G	17	46110826	0.001	0.646687	0	C	G	0.4654	0.3465	0.2182	0.8261
rs2229370:46136751:G:C	17	46136751	0.0284149	0.985517	0	G	C	0.0678	0.3469	-0.1636	0.266
rs66537807	17	46029963	0.346762	1	1	A	-	0.0251	0.3479	0.0817	0.134
rs186370847:46074537:T:C	17	46074537	0.000482975	0.907808	0	T	C	0.5264	0.349	-3.0926	0.007343
rs118060813:46092325:T:C	17	46092325	0.00448298	0.87183	0	T	C	0.1812	0.351	-0.6644	0.09477
chr17_46054107_A_C	17	46054107	0.00903405	1	1	A	C	0.1222	0.351	-0.3309	0.2202
rs181954471:45973074:A:G	17	45973074	0.008	0.973585	0	A	G	0.1212	0.3529	-0.1718	0.5173
rs117604496:46112922:C:T	17	46112922	0.0385511	0.999517	0	C	T	-0.058	0.3531	0.1253	0.3244
17:46055435:G:GTT	17	46055435	0.486796	0.782551	0	G	GTT	-0.0251	0.3533	0.0241	0.663
rs186888642:46041393:T:C	17	46041393	0.00148298	0.952613	0	T	C	0.283	0.354	0.4994	0.4143
rs190020380:46113124:T:C	17	46113124	0.00244893	0.822397	0	T	C	0.2201	0.355	0.5178	0.2865
rs2597169	17	46034091	0.346245	1	1	A	G	-0.0232	0.3555	-0.0648	0.2067
rs150465603:46143063:A:G	17	46143063	0.0161362	0.958619	0	A	G	0.0908	0.3568	0.2091	0.3034
rs2255814:46049125:C:T	17	46049125	0.215381	0.998517	0	C	T	-0.0268	0.357	0.0814	0.1718
rs55767350:46107035:CT:C	17	46107035	0.929721	0.735489	0	CT	C	-0.0498	0.3586	0.0445	0.6907
rs4793732:46033854:C:A	17	46033854	0.328721	0.988966	0	C	A	-0.0235	0.3604	-0.0106	0.8389
rs191088862:45975523:C:T	17	45975523	0.00248298	0.967694	0	C	T	0.213	0.3611	0.0686	0.8887
17:46139023:C:T	17	46139023	0.00451702	0.904749	0	C	T	0.1674	0.3648	0.1107	0.7685
17:46042993:T:C	17	46042993	0.00151702	0.475764	0	T	C	-0.3888	0.3672	-0.8633	0.3326
rs77566800	17	46115972	0.039034	1	1	A	G	0.0562	0.3676	-0.1257	0.3222
rs148189404:46077066:G:C	17	46077066	0.00651702	0.848743	0	G	C	0.1431	0.3691	0.3182	0.3166
rs188102389:46072064:C:T	17	46072064	0.00303405	0.990653	0	C	T	0.2203	0.3693	-0.4322	0.3914
rs117524159:46052322:G:C	17	46052322	0.00303405	0.993585	0	G	C	0.2201	0.3693	-0.4295	0.3941
rs369206391:46107697:A:C	17	46107697	0.219585	0.918	0	A	C	-0.027	0.3756	0.0329	0.5991
rs375579601:46066562:G:A	17	46066562	0.000517025	0.439456	0	G	A	-0.7589	0.3785	-1.38	0.4114
rs371256663:45950171:GAGCCGT:G	17	45950171	0.0404149	0.902994	0	GAGCCGT	G	0.0556	0.3797	-0.1529	0.2347
rs41457949:46123983:G:A	17	46123983	0.0486873	0.984966	0	G	A	-0.0502	0.3801	0.0592	0.6159
rs143857715:46074845:T:TGGGAGCGGGCTC	17	46074845	0.114102	0.994034	0	T	TGGGAGCGGGCTC	0.0329	0.3815	0.047	0.5379
rs61665404:46031320:C:A	17	46031320	0.346245	0.999	0	C	A	0.022	0.3817	0.0682	0.1844
rs146338823:45962589:C:T	17	45962589	0.00551702	0.915477	0	C	T	0.1516	0.3817	0.088	0.8068
rs146841970:46134550:T:C	17	46134550	0.000482975	0.929774	0	T	C	0.4874	0.3875	-3.1537	0.006557
rs144717322:45988833:C:G	17	45988833	0.0134489	0.93683	0	C	G	0.0944	0.3885	-0.0633	0.7756
rs2525083:46047229:C:G	17	46047229	0.215864	0.999	0	C	G	0.025	0.3894	-0.0812	0.1726
rs2923063:46045621:T:C	17	46045621	0.978551	0.998517	0	T	C	-0.0713	0.3905	0.1854	0.2746
rs117428269:46093977:G:A	17	46093977	0.0385511	0.998483	0	G	A	-0.0534	0.3934	0.0982	0.4406
17:46147348:G:A	17	46147348	0.000517025	0.484377	0	G	A	-0.5909	0.3937	-0.3515	0.7837
rs4793738:46043370:G:A	17	46043370	0.723687	0.995517	0	G	A	0.0228	0.3943	-0.1188	0.02995
rs58425874:46099922:C:CT	17	46099922	0.114034	0.95	0	C	CT	-0.0327	0.3945	-0.0625	0.4226
17:45983034:C:G	17	45983034	0.00303405	0.982892	0	C	G	-0.2103	0.3945	0.4246	0.4053
rs190195637:46059917:C:T	17	46059917	0.00248298	0.886898	0	C	T	-0.2048	0.3981	0.0881	0.8585
rs3047638:46021566:CGT:C	17	46021566	0.322966	0.859619	0	CGT	C	0.0235	0.3992	-0.0701	0.2183
rs72823592:46123004:G:A	17	46123004	0.226966	0.994	0	G	A	0.0243	0.3993	-0.0172	0.7717
rs138352360:46073081:G:A	17	46073081	0.000482975	0.957217	0	G	A	0.4073	0.3995	-0.8207	0.4131
rs112153522:46054810:G:A	17	46054810	0.116034	0.999517	0	G	A	-0.0314	0.4005	-0.0518	0.4939
rs72823519:46061885:G:T	17	46061885	0.116034	0.999517	0	G	T	-0.0313	0.4021	-0.052	0.4925
rs35653190:46077967:C:T	17	46077967	0.235272	0.991966	0	C	T	-0.0236	0.4022	-0.0385	0.5028
rs34460325:46054123:G:A	17	46054123	0.000482975	0.934189	0	G	A	0.4089	0.4022	-0.8212	0.4175
rs144488817:46057548:C:A	17	46057548	0.000482975	0.935189	0	C	A	0.4089	0.4022	-0.8219	0.4171
rs112725791:45951604:C:G	17	45951604	0.027	0.624858	0	C	G	0.078	0.4024	-0.1162	0.5422
rs16949761:46033168:C:T	17	46033168	0.004	0.965443	0	C	T	-0.1659	0.4031	0.2739	0.494
17:46075461:G:A	17	46075461	0.000517025	0.450473	0	G	A	0.7038	0.4039	2.1323	0.2241
rs185618815:46062454:C:T	17	46062454	0.000482975	0.941189	0	C	T	0.4067	0.4046	-0.8274	0.4138
rs146141716:46061477:T:C	17	46061477	0.000482975	0.941189	0	T	C	-0.4067	0.4046	0.8274	0.4138
rs2525105:46039543:G:T	17	46039543	0.878068	0.992034	0	G	T	0.0306	0.4053	0.0416	0.5766
17:46018322:A:C	17	46018322	0.001	0.614028	0	A	C	0.4306	0.4061	0.207	0.8435
rs8075245:46083872:A:C	17	46083872	0.102449	0.998034	0	A	C	0.0327	0.4073	-0.0721	0.3698
17:46010649:G:A	17	46010649	0.00148298	0.744616	0	G	A	-0.2761	0.4077	-0.8689	0.1694
17:46146923:C:T	17	46146923	0.00351702	0.866247	0	C	T	-0.1849	0.4079	0.7925	0.08392
rs2285860:46048412:G:T	17	46048412	0.115551	0.991102	0	G	T	-0.031	0.4092	-0.0508	0.5044
rs112104290:46063174:T:C	17	46063174	0.116034	0.999517	0	T	C	0.0306	0.4119	0.0523	0.49
rs72833468:45949338:T:C	17	45949338	0.182068	0.977483	0	T	C	-0.0259	0.4124	0.0359	0.5805
rs2525107:46041404:A:T	17	46041404	0.659279	0.996517	0	A	T	-0.0208	0.4131	-0.002	0.9691
rs11312723:46085586:TA:T	17	46085586	0.111864	0.979585	0	TA	T	-0.0311	0.4166	0.0244	0.7543
17:46009750:GTTACAGGATCACAAT:G	17	46009750	0.002	0.784056	0	GTTACAGGATCACAAT	G	0.2434	0.4168	-0.0704	0.9056
rs192073556:46130995:G:C	17	46130995	0.00248298	0.913136	0	G	C	-0.1967	0.4207	0.2406	0.6291
rs11652891:46078269:T:C	17	46078269	0.160864	0.912585	0	T	C	0.0276	0.4211	-0.0547	0.4342
rs146868363:46017062:G:C	17	46017062	0.0224489	0.987136	0	G	C	-0.0655	0.4215	-0.1794	0.28
rs188994597:46133570:A:G	17	46133570	0.00451702	0.965715	0	A	G	0.1466	0.4227	-0.2409	0.5197
rs79146656:46085284:A:G	17	46085284	0.102449	0.998034	0	A	G	0.0315	0.4248	-0.0734	0.3611
rs184782703:45959024:A:G	17	45959024	0.002	0.849932	0	A	G	-0.2273	0.425	-0.3269	0.5532
rs72823505:46030994:C:T	17	46030994	0.28383	0.995517	0	C	T	0.0211	0.4262	0.0325	0.5485
rs112491235:46085024:T:G	17	46085024	0.102449	0.998034	0	T	G	0.0312	0.4293	-0.0729	0.3648
rs143694175:45973428:C:T	17	45973428	0.00096595	0.755499	0	C	T	0.3286	0.4307	0.1136	0.8914
rs8073371:46096276:C:T	17	46096276	0.200653	0.997517	0	C	T	0.0238	0.4313	-0.0415	0.504
rs1473117	17	46092539	0.114517	1	1	C	T	-0.0293	0.433	-0.0729	0.3368
rs150324254:46117139:A:G	17	46117139	0.00551702	0.898864	0	A	G	0.1362	0.4345	0.4391	0.2226
rs73325369:46085289:T:C	17	46085289	0.102932	0.998034	0	T	C	0.0308	0.4348	-0.073	0.3634
rs73325377:46085824:G:A	17	46085824	0.102449	0.998034	0	G	A	-0.0307	0.4365	0.0768	0.3395
rs113403571:46097524:A:G	17	46097524	0.200653	0.997517	0	A	G	-0.0235	0.4371	0.0392	0.5279
rs16949720:46027257:G:A	17	46027257	0.347245	0.996	0	G	A	0.0195	0.4384	0.0736	0.1522
rs10545074:46094511:CAATA:C	17	46094511	0.280864	0.933204	0	CAATA	C	-0.0211	0.4392	-0.0198	0.721
rs72840229:45987660:C:T	17	45987660	0.0395511	0.910585	0	C	T	0.0502	0.4397	-0.0811	0.5406
rs73325374:46085526:C:T	17	46085526	0.102932	0.998034	0	C	T	-0.0305	0.44	0.0731	0.3632
rs182497718:46046179:G:A	17	46046179	0.00644893	0.855285	0	G	A	-0.1223	0.4401	0.3044	0.3516
rs72823527:46098810:G:T	17	46098810	0.200653	0.997517	0	G	T	0.0233	0.4402	-0.039	0.5307
rs2597167	17	46047656	0.978551	1	1	T	C	-0.0641	0.4406	0.1897	0.2644
rs1962201:46025052:A:G	17	46025052	0.690932	0.997034	0	A	G	0.02	0.4412	-0.0813	0.125
rs16949318:45986328:G:A	17	45986328	0.0395511	0.910619	0	G	A	0.0498	0.443	-0.0803	0.5442
17:46124393:G:GT	17	46124393	0.00151702	0.832108	0	G	GT	0.289	0.4432	0.0801	0.9203
rs117405543:46013226:G:A	17	46013226	0.004	0.815585	0	G	A	-0.1693	0.4442	0.0471	0.916
rs145489940:46039945:T:C	17	46039945	0.00503405	0.878789	0	T	C	0.139	0.4454	-1.5054	6.718e-05
chr17_45969328_C_T	17	45969328	0.045483	1	1	C	T	0.0434	0.4459	-0.1642	0.1565
rs370994594:46113244:C:T	17	46113244	0.000517025	0.460171	0	C	T	-0.6487	0.4467	-1.4049	0.3985
rs2525103:46082559:A:G	17	46082559	0.277204	0.999	0	A	G	0.0202	0.447	0.0085	0.8753
17:46153942:A:G	17	46153942	0.00451702	0.682279	0	A	G	0.1589	0.4478	-0.0498	0.9077
rs118187865:46141507:T:G	17	46141507	0.00451702	0.96913	0	T	G	0.1389	0.4479	-0.2464	0.5104
rs112296021:46101460:G:A	17	46101460	0.200653	0.998	0	G	A	0.023	0.4479	-0.0385	0.5361
17:46097222:CA:C	17	46097222	0.122966	0.756238	0	CA	C	0.0318	0.4503	0.0141	0.8701
17:46107926:C:T	17	46107926	0.00251702	0.978892	0	C	T	0.176	0.4519	0.0125	0.9787
rs139453275:46039111:G:A	17	46039111	0.00348298	0.98583	0	G	A	0.1646	0.4531	-0.0488	0.9158
rs117529076:46039308:C:T	17	46039308	0.00348298	0.98583	0	C	T	0.1646	0.4531	-0.0488	0.9158
rs72823591:46122628:C:T	17	46122628	0.200136	0.995483	0	C	T	0.0226	0.4557	-0.0308	0.6201
17:46051895:GCA:G	17	46051895	0.00151702	0.686643	0	GCA	G	0.2901	0.4558	-0.4628	0.5603
rs192235852:45951464:T:A	17	45951464	0.000482975	0.566839	0	T	A	-0.6478	0.4571	3.4756	0.04265
17:45973958:C:T	17	45973958	0.000482975	0.586077	0	C	T	-0.6468	0.4573	3.4249	0.04561
rs372750269:46018387:C:G	17	46018387	0.000482975	0.58856	0	C	G	0.6449	0.4587	-3.4152	0.04622
	17	46078582	0.00503405	0.894619	0	A	G	0.1347	0.4597	-1.5161	6.009e-05
rs8067005:46119775:C:T	17	46119775	0.200136	0.997483	0	C	T	0.0223	0.4618	-0.033	0.595
rs151187155:46119320:TA:AA	17	46119320	0.200136	0.997483	0	TA	AA	0.0222	0.462	-0.0331	0.5943
rs181743042:45961164:A:C	17	45961164	0.00151702	0.660207	0	A	C	0.246	0.4622	-0.7356	0.2835
rs113187178:46117471:G:A	17	46117471	0.200136	0.997483	0	G	A	0.0222	0.463	-0.0333	0.5915
rs7216504:46117341:G:A	17	46117341	0.200136	0.997483	0	G	A	0.0222	0.4631	-0.0334	0.5913
rs188904048:46067583:T:C	17	46067583	0.000482975	0.588009	0	T	C	0.6385	0.4632	-3.4125	0.04641
rs143499120:46136952:C:T	17	46136952	0.0090681	0.773164	0	C	T	-0.1066	0.4633	-0.2016	0.4967
rs368356261:46063004:C:G	17	46063004	0.000482975	0.588009	0	C	G	0.6381	0.4634	-3.4124	0.04642
rs41280120:46114692:C:G	17	46114692	0.200136	0.998483	0	C	G	-0.0221	0.4641	0.0337	0.5874
rs72823530	17	46109371	0.200136	1	1	G	A	0.022	0.4671	-0.0319	0.6078
rs189979717:45952522:C:T	17	45952522	0.001	0.471789	0	C	T	-0.3247	0.4671	-1.7	0.06737
rs79347027:46038615:C:T	17	46038615	0.0224489	0.994068	0	C	T	-0.0586	0.47	-0.1791	0.2795
rs148964257:46062070:C:T	17	46062070	0.00096595	0.54353	0	C	T	0.3172	0.4701	0.3654	0.6807
rs201635768:46015020:GT:G	17	46015020	0.143245	0.858415	0	GT	G	0.0262	0.4723	-0.1457	0.04864
17:46045881:T:TTTTTG	17	46045881	0.0089319	0.930421	0	T	TTTTTG	-0.0905	0.484	-0.0369	0.8878
rs2875735:46030050:T:C	17	46030050	0.349211	0.998517	0	T	C	-0.0174	0.4871	-0.0688	0.1792
rs58719887:46016784:CA:C	17	46016784	0.269483	0.816449	0	CA	C	0.0208	0.4886	-0.0158	0.7965
rs62064877:46097632:C:T	17	46097632	0.0322383	0.988932	0	C	T	-0.0482	0.489	0.0457	0.7514
rs202116680:46102207:T:TC	17	46102207	0.003	0.578486	0	T	TC	-0.1948	0.4894	-0.2986	0.6028
rs149340516:46054846:G:A	17	46054846	0.000517025	0.476103	0	G	A	-0.5677	0.4898	-1.1431	0.503
rs6503964:46082957:T:G	17	46082957	0.449102	0.982	0	T	G	-0.0165	0.4946	0.0214	0.6639
chr17_46058901_C_T	17	46058901	0.00555107	1	1	C	T	-0.1104	0.4952	-0.1688	0.6094
rs55982711:46065402:G:A	17	46065402	0.114034	0.990517	0	G	A	-0.0256	0.497	-0.042	0.5825
rs117736384:45994049:A:G	17	45994049	0.003	0.964279	0	A	G	-0.1539	0.4993	-0.0259	0.957
17:46057131:C:T	17	46057131	0.000482975	0.609487	0	C	T	-0.4037	0.5001	-1.1705	0.34
rs185688216:46001485:C:T	17	46001485	0.00644893	0.853142	0	C	T	-0.1069	0.5024	0.245	0.4565
rs117940541:46000079:G:A	17	46000079	0.00348298	0.965279	0	G	A	0.1511	0.5065	0.0238	0.9603
rs189486159:46000701:C:T	17	46000701	0.00348298	0.965279	0	C	T	0.151	0.5066	0.0238	0.9604
rs2905852:46075391:G:T	17	46075391	0.267034	0.998	0	G	T	-0.0178	0.5071	0.0306	0.5765
17:46013153:C:A	17	46013153	0.00655107	0.942517	0	C	A	-0.1067	0.5077	0.078	0.8142
rs17617053	17	46050669	0.0956873	1	1	T	C	0.0271	0.5083	0.0098	0.907
17:46059513:C:T	17	46059513	0.001	0.774904	0	C	T	-0.3526	0.509	1.6445	0.1483
rs141856390:45997191:CTTT:C	17	45997191	0.840687	0.880034	0	CTTT	C	0.023	0.5103	-0.0261	0.7128
17:46119484:CTTTTTCTTTTTCTT:C	17	46119484	0.00451702	0.814789	0	CTTTTTCTTTTTCTT	C	0.1285	0.511	0.2418	0.5418
rs117166094:46110457:G:A	17	46110457	0.00496595	0.706053	0	G	A	-0.1415	0.513	-0.055	0.904
17:46079573:CAATAAAATAA:C	17	46079573	0.024966	0.915483	0	CAATAAAATAA	C	-0.0516	0.5131	0.0774	0.6318
rs111275166:46001193:G:A	17	46001193	0.001	0.487378	0	G	A	0.3055	0.5139	-0.9988	0.2745
rs2905850:46074073:A:G	17	46074073	0.733449	1	0	A	G	-0.0174	0.5173	0.0289	0.5973
rs2597165	17	46070706	0.733449	1	1	A	G	-0.0173	0.5187	0.0286	0.6009
rs737130:46071935:A:G	17	46071935	0.733449	0.999517	0	A	G	-0.0173	0.5198	0.0294	0.5913
rs62064873:46074878:A:G	17	46074878	0.267034	0.998	0	A	G	0.0173	0.5206	-0.0301	0.5821
rs186086042:46093207:A:T	17	46093207	0.00796595	0.771496	0	A	T	-0.1002	0.5209	-0.2675	0.3942
17:45966643:T:<INS:ME:ALU>:45966922	17	45966643	0.022	0.717347	0	T	<INS:ME:ALU>	-0.0605	0.5213	0.2502	0.1952
rs2905853:46075551:C:T	17	46075551	0.267551	0.997	0	C	T	-0.0172	0.5216	0.0307	0.5746
rs368585274:46073992:C:CGGGG	17	46073992	0.733449	1	0	C	CGGGG	0.0171	0.5242	-0.0296	0.5883
rs2905848:46073927:A:G	17	46073927	0.733449	1	0	A	G	-0.0171	0.5242	0.0296	0.5883
rs34785219:46096126:G:A	17	46096126	0.290755	0.996517	0	G	A	-0.0167	0.5258	-0.0002	0.9975
rs111880286:45989170:CA:C	17	45989170	0.111313	0.61883	0	CA	C	0.0303	0.5263	-0.026	0.7907
rs80347400	17	46012502	0.14	1	1	A	G	-0.022	0.5268	0.0555	0.4368
rs35004787:45951709:G:C	17	45951709	0.159415	0.983483	0	G	C	0.0207	0.5281	-0.0594	0.3751
rs56119022:45951776:C:T	17	45951776	0.159415	0.983483	0	C	T	0.0207	0.5283	-0.0594	0.3749
chr17_46092738_A_G	17	46092738	0.033034	1	1	G	A	-0.0423	0.5297	0.1376	0.3179
rs2525098	17	46077360	0.367653	1	1	G	T	0.0154	0.5299	-0.0272	0.5871
rs2525094:46071584:T:C	17	46071584	0.733449	1	0	T	C	-0.0169	0.5306	0.0303	0.5803
rs2905851:46074093:G:A	17	46074093	0.733449	0.999	0	G	A	0.0168	0.5322	-0.0291	0.5953
rs140676712:46119788:G:A	17	46119788	0.001	0.466419	0	G	A	0.2881	0.5342	-0.9289	0.3047
rs66721410:45952610:G:A	17	45952610	0.159898	0.984483	0	G	A	0.0204	0.5346	-0.0593	0.3749
rs67892803	17	46088729	0.275238	1	1	TC	T	-0.0165	0.5351	-0.0116	0.8302
rs117534940:46018870:T:A	17	46018870	0.00348298	0.970796	0	T	A	0.1397	0.5361	0.0158	0.9736
rs35533494:45953785:G:A	17	45953785	0.159415	0.986483	0	G	A	0.0202	0.5369	-0.0596	0.3725
rs4793693:45957398:T:C	17	45957398	0.159415	0.991	0	T	C	-0.0202	0.5373	0.0593	0.3737
rs4794225:45957591:T:G	17	45957591	0.159415	0.991	0	T	G	-0.0202	0.5375	0.0593	0.3738
rs2597162:46066049:A:C	17	46066049	0.733449	0.996517	0	A	C	-0.0166	0.5377	0.03	0.5838
rs17617076	17	46051273	0.0224489	1	1	G	C	-0.0494	0.5394	-0.1876	0.2535
rs2525096:46076965:A:G	17	46076965	0.271551	0.989034	0	A	G	0.0165	0.5402	-0.043	0.4323
rs117129265:45963206:T:A	17	45963206	0.0438638	0.93683	0	T	A	-0.0361	0.5447	0.0158	0.8961
chr17_46070253_A_C	17	46070253	0.732966	1	1	C	A	0.0163	0.5449	-0.0254	0.6427
rs736387:46059368:G:A	17	46059368	0.220864	0.999483	0	G	A	-0.0175	0.545	0.0859	0.1456
rs2737:46059071:T:C	17	46059071	0.220864	0.999483	0	T	C	0.0174	0.545	-0.0862	0.144
rs28619991:45967080:C:A	17	45967080	0.00651702	0.892347	0	C	A	-0.0991	0.5479	-0.0995	0.7704
rs76950846:46102153:G:A	17	46102153	0.197653	0.990551	0	G	A	0.0184	0.548	-0.0446	0.4778
rs12948368:45957975:A:G	17	45957975	0.159932	0.991	0	A	G	-0.0196	0.5484	0.0591	0.375
rs117756696:46135674:A:G	17	46135674	0.005	0.759241	0	A	G	-0.1097	0.5499	-0.3411	0.3635
rs187101394:45970139:G:A	17	45970139	0.000517025	0.356709	0	G	A	-0.5265	0.5506	-0.4246	0.8245
rs141608552:46072680:A:G	17	46072680	0.039483	0.993	0	A	G	-0.0364	0.5523	-0.0989	0.4264
rs75129630:46092821:G:A	17	46092821	0.033034	0.995	0	G	A	-0.0401	0.5535	0.1356	0.3269
rs183184314:46138088:C:G	17	46138088	0.000482975	0.55344	0	C	G	-0.39	0.5547	-0.2548	0.8643
rs112940396:46030675:G:T	17	46030675	0.04	0.994966	0	G	T	0.0359	0.5548	0.1065	0.3865
rs117660125:46157284:T:C	17	46157284	0.039034	1	0	T	C	0.0369	0.5555	-0.1037	0.4156
rs139257740:46078057:C:T	17	46078057	0.00403405	0.680737	0	C	T	0.1412	0.5557	-0.5507	0.2682
rs111575522:46044544:C:A	17	46044544	0.046	0.992966	0	C	A	0.0333	0.5562	-0.1175	0.3085
rs72840238:45998346:G:C	17	45998346	0.0060681	0.894232	0	G	C	-0.0978	0.5583	-0.2593	0.4485
rs2905849:46074023:T:C	17	46074023	0.733966	0.998483	0	T	C	-0.0157	0.5589	0.0293	0.5927
rs885634:46072229:A:G	17	46072229	0.732449	0.997	0	A	G	-0.0157	0.5599	0.029	0.5956
rs1476579:46070431:C:G	17	46070431	0.733966	1	0	C	G	-0.0156	0.5607	0.0277	0.6125
rs144929025:46142778:T:A	17	46142778	0.001	0.951681	0	T	A	0.2235	0.5635	1.364	0.09566
rs144304508:46101478:C:G	17	46101478	0.006	0.951796	0	C	G	0.0955	0.5645	0.1691	0.6169
rs35702577:45953990:T:G	17	45953990	0.159898	0.987966	0	T	G	-0.0188	0.5658	0.0572	0.3912
rs11545723:46035180:G:A	17	46035180	0.179381	1	0	G	A	0.0178	0.566	-0.0467	0.4601
rs2325750:46022330:G:A	17	46022330	0.688	0.994585	0	G	A	-0.0148	0.567	0.0776	0.1428
17:46093815:G:A	17	46093815	0.00148298	0.804923	0	G	A	0.1993	0.567	-0.0331	0.9643
rs182365555:46090263:C:T	17	46090263	0.00151702	0.818594	0	C	T	-0.1946	0.5672	-0.1823	0.7899
rs3764400	17	46123932	0.137687	1	1	T	C	0.0197	0.5674	0.0383	0.5852
rs35478586:46039128:A:C	17	46039128	0.00296595	0.990796	0	A	C	0.1191	0.5676	-0.3035	0.4666
rs2597164:46069980:C:T	17	46069980	0.220864	0.996	0	C	T	-0.0164	0.5691	0.0837	0.1561
rs72823602	17	46139167	0.0390681	1	1	A	G	-0.0353	0.5707	0.0503	0.6937
rs35480192:45958731:G:A	17	45958731	0.160415	0.991517	0	G	A	0.0185	0.5707	-0.0587	0.3776
rs2597172:46052793:A:G	17	46052793	0.734449	1	0	A	G	-0.0152	0.5715	0.0302	0.5819
rs35132293:45954724:G:T	17	45954724	0.160898	0.984517	0	G	T	0.0185	0.5722	-0.0565	0.3975
rs2597171:46052162:T:C	17	46052162	0.734932	1	0	T	C	-0.0152	0.5722	0.029	0.5968
rs4793734	17	46034105	0.179381	1	1	T	C	-0.0175	0.5733	0.0459	0.4684
c17_pos43303852	17	45948853	0.0114149	1	1	T	C	-0.0613	0.5742	0.0118	0.9572
17:45981628:CA:C	17	45981628	0.041483	0.587136	0	CA	C	-0.0436	0.5744	-0.0643	0.6851
rs148741395:46156541:C:T	17	46156541	0.00696595	0.876102	0	C	T	-0.0861	0.5747	-0.3402	0.283
rs2525087:46054264:C:A	17	46054264	0.735449	1	0	C	A	0.0151	0.5749	-0.029	0.5967
rs8076314:46054433:A:G	17	46054433	0.735449	1	0	A	G	-0.015	0.5775	0.0291	0.5963
rs2597181:46062164:T:C	17	46062164	0.735449	1	0	T	C	-0.015	0.578	0.0315	0.5662
rs2597179:46061030:G:C	17	46061030	0.735449	1	0	G	C	0.015	0.578	-0.0315	0.5662
rs729786:46060231:T:G	17	46060231	0.735449	1	0	T	G	-0.015	0.5781	0.0315	0.5663
rs2003477:46067612:A:T	17	46067612	0.734966	1	0	A	T	-0.0149	0.5798	0.0247	0.6519
rs183878870:45989823:T:C	17	45989823	0.0390681	0.931034	0	T	C	-0.0351	0.5812	-0.0101	0.9386
rs62067368:45959156:C:T	17	45959156	0.160415	0.992517	0	C	T	0.018	0.5826	-0.0586	0.3788
rs75761992	17	46124148	0.0598638	1	1	T	C	0.0272	0.584	-0.1626	0.1062
rs2597161:46063520:A:G	17	46063520	0.734966	1	0	A	G	-0.0147	0.584	0.0332	0.5448
rs74953446:46092187:C:T	17	46092187	0.033034	0.995034	0	C	T	-0.037	0.5847	0.1372	0.3223
rs739853:46067557:C:A	17	46067557	0.734449	1	0	C	A	0.0147	0.5853	-0.0265	0.6285
rs147011598:46109283:A:C	17	46109283	0.004	0.919121	0	A	C	-0.1087	0.5855	0.1247	0.7617
rs2003478:46067663:C:T	17	46067663	0.734449	1	0	C	T	0.0147	0.586	-0.0264	0.6298
rs140434790:45984609:G:A	17	45984609	0.000482975	0.89457	0	G	A	0.2367	0.5875	-0.8495	0.3431
rs56686472:46078404:A:G	17	46078404	0.00348298	0.50073	0	A	G	0.1431	0.5883	-0.7239	0.1761
rs140103969:45980760:G:A	17	45980760	0.000482975	0.892087	0	G	A	0.2358	0.5894	-0.854	0.3417
rs188219038:45980260:T:C	17	45980260	0.000482975	0.891604	0	T	C	-0.2352	0.5906	0.8547	0.3417
rs200811233:45995474:TGAG:T	17	45995474	0.00203405	0.714928	0	TGAG	T	0.1703	0.5907	-0.6783	0.3069
rs117863412:45978879:C:T	17	45978879	0.000482975	0.890638	0	C	T	0.2339	0.593	-0.8569	0.3412
rs372385638:45984426:CA:C	17	45984426	0.000482975	0.893604	0	CA	C	-0.2331	0.5932	0.8543	0.3404
rs2525092:46065080:G:A	17	46065080	0.734449	1	0	G	A	0.0143	0.5942	-0.0312	0.5698
rs729785:46060159:A:G	17	46060159	0.734449	0.999517	0	A	G	-0.0143	0.5943	0.0311	0.5704
rs2525090:46064925:C:G	17	46064925	0.734449	1	0	C	G	-0.0143	0.5945	0.0296	0.5889
rs146908495:45998105:T:A	17	45998105	0.000482975	0.903223	0	T	A	0.2313	0.5947	-0.833	0.3504
rs33983467:46102904:G:A	17	46102904	0.291238	0.997517	0	G	A	-0.0139	0.595	-0.0064	0.9043
rs111994792:45981936:G:C	17	45981936	0.001	0.782527	0	G	C	0.2038	0.5953	-1.0815	0.157
rs186007670:46088273:G:A	17	46088273	0.00903405	0.821743	0	G	A	-0.0735	0.5958	0.0379	0.8957
rs145760936:45976706:A:G	17	45976706	0.000482975	0.888672	0	A	G	-0.2324	0.5961	0.8608	0.3402
rs201902433:45970548:GC:G	17	45970548	0.001	0.787124	0	GC	G	-0.2449	0.5966	1.1335	0.2307
rs183279639:46010167:C:T	17	46010167	0.000482975	0.904257	0	C	T	0.2298	0.5969	-0.8288	0.3525
rs180867792:46017061:C:T	17	46017061	0.000482975	0.904257	0	C	T	0.2287	0.5988	-0.8291	0.3525
rs186583396:46013461:A:G	17	46013461	0.006	0.95634	0	A	G	-0.084	0.6009	-0.7423	0.02584
rs6503949:46065743:G:A	17	46065743	0.734449	0.999517	0	G	A	0.0141	0.601	-0.0298	0.5862
rs2525088:46056995:C:T	17	46056995	0.733966	0.996	0	C	T	0.0141	0.6014	-0.0246	0.6542
rs186213784:46113351:C:T	17	46113351	0.00903405	0.817777	0	C	T	-0.0721	0.6022	-0.0073	0.9798
rs11270193:46063791:C:CCTTTCAGTGTTGCT	17	46063791	0.734449	0.999	0	C	CCTTTCAGTGTTGCT	0.014	0.6022	-0.0304	0.579
rs2525093:46065092:A:C	17	46065092	0.734449	1	0	A	C	-0.014	0.603	0.0323	0.556
rs2597180:46061412:T:C	17	46061412	0.734449	1	0	T	C	-0.014	0.6033	0.0307	0.5753
rs2525091:46065046:T:C	17	46065046	0.734449	1	0	T	C	-0.014	0.6034	0.0307	0.5748
rs2875746	17	46055347	0.734449	1	1	A	G	-0.014	0.6035	0.0272	0.62
rs2597173:46055106:C:T	17	46055106	0.734449	1	0	C	T	0.014	0.6043	-0.0273	0.6183
rs202133524:46115808:TCTAA:T	17	46115808	0.020966	0.959585	0	TCTAA	T	-0.0441	0.6045	-0.1807	0.2997
17:46104121:G:A	17	46104121	0.006	0.795694	0	G	A	-0.0873	0.6045	-0.1932	0.5724
rs139220224:46135072:G:T	17	46135072	0.000482975	0.679381	0	G	T	-0.3015	0.6052	2.9361	0.01266
rs187347621:46013361:G:A	17	46013361	0.002	0.82934	0	G	A	-0.16	0.6066	1.3861	0.02958
rs188180804:46031116:G:A	17	46031116	0.000482975	0.363952	0	G	A	-0.3395	0.6068	0.4624	0.737
rs34428844:46030042:C:T	17	46030042	0.179381	0.999517	0	C	T	0.016	0.6075	-0.0494	0.4344
rs62067378:45990050:A:G	17	45990050	0.00351702	0.782647	0	A	G	0.1106	0.6089	-0.0417	0.9238
rs117371336:45949770:T:C	17	45949770	0.0114149	0.993449	0	T	C	-0.0558	0.6113	0.0483	0.8276
rs117126973:46013449:A:T	17	46013449	0.005	0.862062	0	A	T	0.0904	0.6124	-0.0701	0.8428
17:45966687:CTT:C	17	45966687	0.000482975	0.885189	0	CTT	C	-0.2242	0.6129	0.8462	0.3557
rs76984226:46155393:C:T	17	46155393	0.004	0.8173	0	C	T	-0.1037	0.6137	-0.3016	0.4726
rs73985445:46023160:G:A	17	46023160	0.0214489	0.992517	0	G	A	-0.0417	0.6143	0.1894	0.2617
rs2597174:46057029:G:A	17	46057029	0.733449	0.994517	0	G	A	0.0135	0.6161	-0.0251	0.6472
rs149561617:45965190:G:A	17	45965190	0.000482975	0.882155	0	G	A	0.2214	0.6179	-0.8485	0.3552
17:46154819:T:G	17	46154819	0.00448298	0.785353	0	T	G	0.0981	0.618	-0.897	0.02255
rs75924152:46120970:G:A	17	46120970	0.00151702	0.608021	0	G	A	0.186	0.6183	-0.0768	0.9189
rs150586473:45963108:T:C	17	45963108	0.000482975	0.882774	0	T	C	-0.2204	0.6199	0.85	0.3556
rs147682532:46065526:T:C	17	46065526	0.010483	0.361102	0	T	C	0.0993	0.6202	-0.0307	0.941
rs8079333:45972272:A:C	17	45972272	0.649687	0.975585	0	A	C	0.0124	0.6224	0.1024	0.04665
rs33978890:46096914:G:GA	17	46096914	0.418415	0.763279	0	G	GA	-0.0136	0.6228	-0.0432	0.4455
rs141983672:45960908:C:A	17	45960908	0.000482975	0.880808	0	C	A	0.2182	0.6241	-0.8528	0.3553
rs117803378:45960345:A:T	17	45960345	0.000482975	0.880325	0	A	T	-0.2176	0.6253	0.8541	0.3549
rs79730487:45972413:T:G	17	45972413	0.647687	0.967585	0	T	G	0.0123	0.6256	0.093	0.07154
rs74777667	17	46042494	0.0543127	1	1	G	A	0.0256	0.6263	0.1573	0.1449
rs192715896:46092107:T:C	17	46092107	0.00196595	0.597924	0	T	C	0.1501	0.6265	0.7067	0.2795
rs2905855	17	46081915	0.455619	1	1	G	A	0.0116	0.6272	-0.0175	0.7186
17:45996797:A:T	17	45996797	0.001	0.646873	0	A	T	0.2089	0.6306	0.5564	0.5344
rs149047977:45952874:C:T	17	45952874	0.000482975	0.773087	0	C	T	0.2375	0.6309	-0.9794	0.3568
rs76515908:46141923:A:T	17	46141923	0.0104489	0.924483	0	A	T	0.0575	0.6328	-0.2383	0.3295
rs188996431:46111777:C:A	17	46111777	0.000482975	0.761201	0	C	A	0.3661	0.6359	-1.1967	0.519
rs141483368:46064515:C:T	17	46064515	0.012517	0.918306	0	C	T	-0.0542	0.6371	-0.0743	0.7515
rs67369540:46009938:AT:A	17	46009938	0.679272	0.921932	0	AT	A	-0.0126	0.6382	0.0511	0.3506
rs72823599:46132424:C:G	17	46132424	0.195102	0.999517	0	C	G	-0.0144	0.6387	0.0361	0.5663
rs2597178	17	46060841	0.22183	1	1	C	T	-0.0135	0.6387	0.0795	0.1771
rs145500957:45951953:C:T	17	45951953	0.000517025	0.567628	0	C	T	-0.3641	0.6395	0.1113	0.9442
rs72823601:46135208:C:T	17	46135208	0.195102	1	0	C	T	0.0143	0.6401	-0.036	0.5665
rs1043603:46059110:C:T	17	46059110	0.0315511	0.980932	0	C	T	-0.0328	0.6416	0.1426	0.3218
chr17_45959996_C_T	17	45959996	0.982653	1	1	C	T	-0.0414	0.6423	-0.0047	0.9794
rs72825504:46139479:C:T	17	46139479	0.195102	1	0	C	T	0.0142	0.6424	-0.036	0.5669
rs150641900:46041632:G:A	17	46041632	0.038517	0.999	0	G	A	0.0287	0.6427	0.1308	0.2966
rs184327381:46135439:T:G	17	46135439	0.004	0.642204	0	T	G	-0.105	0.6453	0.9078	0.05197
rs192837489:46082419:G:C	17	46082419	0.006	0.942034	0	G	C	0.0767	0.6457	0.9226	0.007747
17:46003344:G:A	17	46003344	0.00248298	0.53609	0	G	A	0.1361	0.6466	-0.1506	0.8014
rs56407566:46148155:C:T	17	46148155	0.195102	1	0	C	T	0.014	0.6473	-0.0359	0.5682
rs72825512:46155069:C:T	17	46155069	0.195102	1	0	C	T	0.014	0.6483	-0.0359	0.5677
rs79541578:46102728:G:A	17	46102728	0.208789	0.989551	0	G	A	0.0135	0.6533	-0.0154	0.8026
17:46158314:ATATATATATATAT:A	17	46158314	0.00903405	0.525498	0	ATATATATATATAT	A	-0.0781	0.6533	-0.0268	0.9402
rs117551632:45966567:G:A	17	45966567	0.011034	0.895851	0	G	A	0.0547	0.6546	-0.6544	0.009445
rs2525097:46077188:C:G	17	46077188	0.77917	0.990551	0	C	G	-0.0129	0.6551	0.0745	0.208
rs184647363:46110189:C:T	17	46110189	0.00251702	0.946511	0	C	T	0.1136	0.6554	-0.651	0.2234
rs116013364:46033412:C:G	17	46033412	0.039	0.997483	0	C	G	-0.0271	0.6599	-0.1259	0.313
rs12940701:46114620:C:T	17	46114620	0.291755	0.993034	0	C	T	-0.0114	0.6648	-0.0061	0.9085
rs149111560:46071231:G:T	17	46071231	0.00844893	0.953313	0	G	T	0.0581	0.6651	0.0979	0.7185
rs12940653:46043033:T:A	17	46043033	0.00903405	0.937994	0	T	A	-0.0585	0.667	0.0547	0.8452
rs58554000:46095432:C:T	17	46095432	0.106551	0.997	0	C	T	-0.0165	0.6676	-0.0785	0.3158
rs35928933:46097513:G:A	17	46097513	0.000482975	0.441455	0	G	A	-0.2814	0.6676	-0.7787	0.5355
rs11657628:46045923:G:A	17	46045923	0.0295511	0.981	0	G	A	-0.0309	0.6681	0.1187	0.4193
rs148719838:46037980:A:G	17	46037980	0.010483	0.343511	0	A	G	0.0892	0.6686	-0.0067	0.9875
rs4413003:45961829:C:T	17	45961829	0.982653	0.998	0	C	T	-0.0381	0.6691	-0.0072	0.9683
rs117418848:46108501:G:A	17	46108501	0.012517	0.949789	0	G	A	0.0478	0.6697	-0.6395	0.005688
rs8066574:45969835:G:C	17	45969835	0.710653	0.993	0	G	C	-0.0112	0.6706	-0.0996	0.06525
rs114263199:46032297:T:G	17	46032297	0.039	0.996966	0	T	G	-0.0261	0.6722	-0.1267	0.3102
rs368031557:46085574:CCCTGTCTCT:C	17	46085574	0.0602043	0.704721	0	CCCTGTCTCT	C	-0.0256	0.6737	-0.0805	0.5188
rs12942207:45968294:C:T	17	45968294	0.710653	0.993	0	C	T	-0.0111	0.6745	-0.0992	0.06621
rs2002136:46022889:C:T	17	46022889	0.355279	0.994	0	C	T	0.0105	0.6748	0.0922	0.0716
rs146338356:46065052:C:CCT	17	46065052	0.00744893	0.768013	0	C	CCT	0.0658	0.6771	-0.7012	0.03015
rs9674965:45972399:T:G	17	45972399	0.003	0.664966	0	T	G	-0.1104	0.6775	-0.0993	0.8595
rs191768236:46152355:C:G	17	46152355	0.000482975	0.659	0	C	G	0.2372	0.6782	-2.7515	0.01671
17:46038278:A:C	17	46038278	0.00448298	0.259687	0	A	C	0.287	0.6788	-0.0301	0.9824
rs75222374:46104404:G:A	17	46104404	0.0263468	0.991449	0	G	A	0.031	0.679	0.1049	0.5015
rs141131264:46036219:T:C	17	46036219	0.038517	0.999	0	T	C	-0.0256	0.6796	-0.1381	0.2715
rs61758369:46058612:A:G	17	46058612	0.00348298	0.987728	0	A	G	-0.0887	0.6807	0.1151	0.8002
rs186593346:46054675:C:T	17	46054675	0.00348298	0.987728	0	C	T	0.0887	0.6807	-0.1147	0.8008
rs17680229	17	46129762	0.143238	1	1	G	A	0.0141	0.6808	0.0179	0.7985
rs191902054:46048559:G:A	17	46048559	0.00348298	0.988245	0	G	A	0.0886	0.6809	-0.1145	0.8012
rs180739791:46068841:T:C	17	46068841	0.001	0.981068	0	T	C	0.1774	0.6818	-0.1184	0.8896
17:45996368:TAC:TACAC	17	45996368	0.609489	0.984068	0	TAC	TACAC	-0.0102	0.6819	-0.0223	0.6603
17:46146959:CA:C	17	46146959	0.187796	0.69983	0	CA	C	0.0148	0.6829	-0.1379	0.06075
rs147701933:45981105:A:C	17	45981105	0.033	0.968	0	A	C	-0.0277	0.685	-0.033	0.8134
rs142981153:46094617:C:T	17	46094617	0.003	0.572281	0	C	T	0.1121	0.6852	0.3194	0.5701
17:45989808:CT:C	17	45989808	0.153864	0.740966	0	CT	C	0.0155	0.6852	-0.1131	0.146
rs16949427:45992916:C:T	17	45992916	0.0997957	0.979517	0	C	T	-0.0163	0.6855	-0.0299	0.7138
rs59128042:46112176:C:G	17	46112176	0.0564149	0.992	0	C	G	0.0207	0.6873	-0.1287	0.2207
rs111682782:46003799:C:T	17	46003799	0.0214489	0.997068	0	C	T	-0.033	0.6899	0.1875	0.267
rs193127567:46133535:G:C	17	46133535	0.00244893	0.852502	0	G	C	0.0973	0.6911	0.0137	0.9782
rs117717919:45969596:C:T	17	45969596	0.000517025	0.282496	0	C	T	-0.5533	0.6914	-1.4989	0.5737
rs35835097:46031022:C:CA	17	46031022	0.231313	0.799074	0	C	CA	-0.0126	0.6924	-0.0685	0.2876
rs61542227:46104606:C:A	17	46104606	0.0564149	0.996	0	C	A	-0.0202	0.6934	0.1313	0.21
17:46148636:C:T	17	46148636	0.002	0.652758	0	C	T	-0.1275	0.6945	-0.3981	0.551
17:46061603:G:A	17	46061603	0.001	0.342594	0	G	A	0.1823	0.7007	-1.0272	0.3008
17:45958124:G:A	17	45958124	0.374415	0.596789	0	G	A	0.0122	0.7023	-0.0714	0.2732
rs56947799:45994524:T:C	17	45994524	0.0214489	0.997068	0	T	C	0.0315	0.7037	-0.1891	0.2633
chr17_46024254_A_T	17	46024254	0.0482787	1	1	A	T	-0.0212	0.704	-0.2403	0.0365
rs113112932:46098242:G:A	17	46098242	0.106551	0.996517	0	G	A	-0.0145	0.706	-0.0737	0.3461
rs72823528:46098944:C:T	17	46098944	0.106551	0.996517	0	C	T	-0.0144	0.7081	-0.0737	0.3464
rs113383373:45997267:A:G	17	45997267	0.002	0.746161	0	A	G	-0.1189	0.7091	-0.4635	0.4854
rs55956628:45996264:C:G	17	45996264	0.10183	0.998517	0	C	G	0.0147	0.71	0.047	0.5574
rs146732730:46076087:T:C	17	46076087	0.009	0.870313	0	T	C	-0.0498	0.7121	0.5851	0.03367
17:46115122:A:AG	17	46115122	0.993517	0.819768	0	A	AG	0.0619	0.7123	0.1954	0.5732
rs59976747:46009811:C:T	17	46009811	0.101279	0.999	0	C	T	-0.0146	0.7124	-0.0461	0.565
rs200348233:46132955:GCA:G	17	46132955	0.0169319	0.949	0	GCA	G	0.0358	0.7125	0.1842	0.3646
rs74412170:46117509:C:G	17	46117509	0.106551	0.996	0	C	G	0.0139	0.7176	0.0719	0.3578
rs142140101:46043258:C:T	17	46043258	0.038517	0.996034	0	C	T	0.0222	0.7192	0.1343	0.2851
17:46078545:CATAA:C	17	46078545	0.00451702	0.575647	0	CATAA	C	0.0874	0.7193	0.2919	0.5499
rs73323310:45999120:A:G	17	45999120	0.101279	0.998517	0	A	G	0.0141	0.7207	0.046	0.5661
rs8082043	17	46073080	0.322619	1	1	C	T	-0.0092	0.7211	-0.0272	0.6051
rs137892509:46022573:C:T	17	46022573	0.00551702	0.906932	0	C	T	-0.0614	0.7239	-0.3745	0.2963
17:46115009:TC:T	17	46115009	0.0263468	0.987517	0	TC	T	0.0265	0.724	0.099	0.5264
rs2229368	17	46134798	0.0263468	1	1	C	T	0.0263	0.7244	0.0686	0.6586
rs17617250:46010893:C:A	17	46010893	0.175864	0.997517	0	C	A	0.0111	0.7252	-0.0564	0.3782
17:46049493:A:C	17	46049493	0.00548298	0.389746	0	A	C	-0.0957	0.7255	0.0921	0.8666
rs62064918:46155786:C:T	17	46155786	0.232858	1	0	C	T	-0.0099	0.7259	-0.0253	0.6611
rs77140348:46118595:A:G	17	46118595	0.0263468	0.986034	0	A	G	-0.0263	0.726	-0.0969	0.5351
rs139928339:46051148:T:TG	17	46051148	0.000517025	0.354897	0	T	TG	0.3466	0.7262	2.5377	0.2037
rs8081209:46157540:A:G	17	46157540	0.232858	1	0	A	G	0.0099	0.7266	0.0253	0.661
rs35662223	17	46089813	0.232755	1	1	T	C	0.0098	0.7269	0.0348	0.5447
17:45981624:G:T	17	45981624	0.010034	0.672681	0	G	T	0.0511	0.7271	-0.262	0.3871
rs61165779:46022824:CT:C	17	46022824	0.00751702	0.888796	0	CT	C	-0.0511	0.7274	-0.4262	0.1515
rs34064155:45969849:G:A	17	45969849	0.571858	0.996034	0	G	A	-0.0084	0.7286	-0.0564	0.2517
rs8438:46147945:G:A	17	46147945	0.232858	1	0	G	A	-0.0098	0.7296	-0.025	0.6647
rs12947056:46149964:G:A	17	46149964	0.232858	1	0	G	A	-0.0097	0.7318	-0.0252	0.6624
rs757353:46122270:A:G	17	46122270	0.107551	0.996	0	A	G	0.0132	0.7321	0.0752	0.3358
rs148500430:46130259:C:T	17	46130259	0.00651702	0.751418	0	C	T	-0.059	0.7328	0.203	0.575
rs12601350:46120419:T:C	17	46120419	0.107034	0.997483	0	T	C	0.0131	0.7329	0.0751	0.3362
rs72823532:46111931:C:T	17	46111931	0.107034	1	0	C	T	-0.0131	0.7332	-0.075	0.3367
rs12602131:46119566:G:A	17	46119566	0.107034	0.998	0	G	A	-0.0131	0.7332	-0.0751	0.3361
rs72823533:46116643:G:C	17	46116643	0.107034	0.998	0	G	C	-0.0131	0.7335	-0.075	0.3364
rs72823504:46030645:G:A	17	46030645	0.004	0.944653	0	G	A	0.0671	0.7338	0.2142	0.5979
rs12950225	17	46145200	0.559272	1	1	A	G	-0.0081	0.7352	0.0237	0.6294
rs62064917:46155700:G:A	17	46155700	0.232858	1	0	G	A	-0.0095	0.7357	-0.0255	0.6586
rs8065464:46158023:G:A	17	46158023	0.232858	1	0	G	A	-0.0095	0.7366	-0.0255	0.6584
17:46089946:G:A	17	46089946	0.00351702	0.618711	0	G	A	0.0964	0.7379	0.4733	0.4288
rs112771900:45954749:T:C	17	45954749	0.000482975	0.778604	0	T	C	-0.1613	0.7403	0.9905	0.3411
rs12602670:46104880:T:C	17	46104880	0.107034	0.997517	0	T	C	0.0127	0.7416	0.075	0.3367
rs75842564:46079722:T:C	17	46079722	0.00151702	0.76252	0	T	C	-0.1087	0.7426	-0.4656	0.4775
rs13353189:45969605:G:A	17	45969605	0.571858	0.996034	0	G	A	-0.0079	0.7431	-0.0553	0.2615
rs12602010:46126116:G:A	17	46126116	0.237789	0.990517	0	G	A	-0.0092	0.7441	-0.027	0.6389
rs7220104:46024660:A:C	17	46024660	0.357728	0.995	0	A	C	-0.008	0.7474	-0.0929	0.06895
chr17_46052883_A_G	17	46052883	0.039	1	1	G	A	0.0197	0.7477	0.1309	0.2937
rs199825277:45973697:C:G	17	45973697	0.0109319	0.882313	0	C	G	-0.0388	0.7482	-0.0169	0.9453
rs35841265:46150144:C:CA	17	46150144	0.232375	0.986483	0	C	CA	-0.0091	0.75	-0.0139	0.8106
rs118036504:46073854:T:C	17	46073854	0.0138979	0.980381	0	T	C	-0.033	0.75	-0.0488	0.8162
rs117076490:46128244:A:T	17	46128244	0.0105511	0.946477	0	A	T	-0.039	0.7504	-0.1522	0.5468
rs141314511:45965671:C:T	17	45965671	0.00196595	0.778177	0	C	T	0.0881	0.7508	-0.8036	0.138
rs2240119	17	46111172	0.107034	1	1	T	C	0.0121	0.752	0.0752	0.3347
rs201950955:46083930:AATT:A	17	46083930	0.0156192	0.887926	0	AATT	A	-0.0327	0.7521	-0.2566	0.2266
rs11079804	17	46020698	0.175381	1	1	C	T	0.0099	0.7532	-0.0562	0.3799
rs368919036:45985952:C:G	17	45985952	0.00196595	0.724384	0	C	G	-0.0947	0.7534	-0.1129	0.8569
rs180747198:46049343:G:A	17	46049343	0.00251702	0.61896	0	G	A	0.0921	0.7549	0.2421	0.6863
rs201764131:46140440:C:CA	17	46140440	0.305932	0.935517	0	C	CA	0.0084	0.757	0.0011	0.9845
rs373303332:46127819:C:T	17	46127819	0.000517025	0.449561	0	C	T	0.1955	0.7578	-1.2752	0.3401
rs2325783:46142907:A:G	17	46142907	0.105551	1	0	A	G	0.0119	0.7588	0.0917	0.2439
rs371148120:46137055:GCTGGACCTGGAC:GCTGGAC	17	46137055	0.105551	1	0	GCTGGACCTGGAC	GCTGGAC	-0.0118	0.7596	-0.0916	0.2439
rs8069936:46074349:A:T	17	46074349	0.407272	0.685	0	A	T	0.0088	0.7604	-0.0003	0.9959
rs16949296:45984949:A:G	17	45984949	0.0823468	0.998517	0	A	G	0.0131	0.7614	0.074	0.3983
rs3764393:45976738:T:C	17	45976738	0.0823468	0.995551	0	T	C	0.0131	0.762	0.0776	0.3762
rs4995899:46150730:G:A	17	46150730	0.105551	1	0	G	A	-0.0116	0.7638	-0.0915	0.2447
rs77496633	17	46013618	0.0435511	1	1	T	G	-0.0173	0.7642	-0.0618	0.5971
rs16951519:46152291:G:A	17	46152291	0.105551	1	0	G	A	-0.0116	0.7646	-0.0915	0.2448
rs11079803:46019901:G:A	17	46019901	0.466728	0.996517	0	G	A	-0.0072	0.765	0.0518	0.2932
rs12946143:46154943:C:T	17	46154943	0.105551	1	0	C	T	-0.0116	0.7654	-0.0915	0.245
rs3764394:45976824:A:G	17	45976824	0.341347	0.996517	0	A	G	-0.0075	0.7659	-0.1014	0.04815
rs2001226:45966977:T:C	17	45966977	0.0599319	0.992034	0	T	C	-0.015	0.766	0.1048	0.3076
rs112725447:46149651:G:A	17	46149651	0.105551	1	0	G	A	-0.0115	0.766	-0.0916	0.2441
17:46086564:G:A	17	46086564	0.009	0.348851	0	G	A	-0.0656	0.766	0.2386	0.5975
rs139393864:46131209:A:AG	17	46131209	0.0268638	0.999	0	A	AG	-0.0219	0.7686	-0.0737	0.6354
rs2255815:46049126:A:G	17	46049126	0.729449	0.999517	0	A	G	-0.0078	0.7694	0.0338	0.5345
rs11653445:45978787:A:G	17	45978787	0.341347	0.997517	0	A	G	-0.0074	0.7697	-0.1022	0.04636
17:45958966:C:T	17	45958966	0.00151702	0.680653	0	C	T	-0.1082	0.7697	-0.6791	0.368
rs140624474:46096700:T:C	17	46096700	0.0305851	0.997034	0	T	C	0.0203	0.7729	-0.0829	0.565
rs2525085:46048858:C:G	17	46048858	0.729449	0.999517	0	C	G	-0.0077	0.7734	0.0334	0.5395
rs56279716:45999890:CTT:C	17	45999890	0.102313	0.993	0	CTT	C	0.0113	0.7737	0.0524	0.512
rs376488138:45954358:A:G	17	45954358	0.00248298	0.536004	0	A	G	0.0977	0.7751	-0.1035	0.8781
rs5820679:46097404:GT:GTT	17	46097404	0.010034	0.892579	0	GT	GTT	0.0373	0.7767	0.6	0.02598
rs181265059:46129603:C:T	17	46129603	0.0069319	0.926415	0	C	T	0.0423	0.7779	0.0569	0.8496
rs2525084:46048157:A:G	17	46048157	0.729449	1	0	A	G	-0.0075	0.7789	0.0332	0.5417
rs376843567:46068904:G:T	17	46068904	0.001	0.677359	0	G	T	-0.1214	0.78	1.2661	0.1493
rs185462036:46078345:G:A	17	46078345	0.00296595	0.810344	0	G	A	-0.0674	0.7808	-0.1811	0.71
rs2240120:46142144:C:T	17	46142144	0.105551	0.998517	0	C	T	-0.0107	0.7818	-0.0943	0.2312
17:46117496:C:A	17	46117496	0.00696595	0.636338	0	C	A	0.0505	0.7822	-0.1104	0.7633
rs143851165:46061776:A:G	17	46061776	0.00096595	0.536006	0	A	G	-0.1262	0.7825	-0.4432	0.627
rs117197317:45973685:G:T	17	45973685	0.032	0.962551	0	G	T	0.019	0.7839	-0.0045	0.9745
rs2229369:46136133:G:C	17	46136133	0.105551	1	0	G	C	-0.0105	0.7859	-0.0908	0.2485
17:46065138:T:C	17	46065138	0.00348298	0.80953	0	T	C	0.0597	0.7869	-0.5	0.2754
rs55920502:46146505:C:T	17	46146505	0.105551	1	0	C	T	-0.0104	0.7883	-0.0908	0.2488
rs186988055:46151864:C:T	17	46151864	0.001	0.906598	0	C	T	0.1185	0.7883	-0.5917	0.5036
rs2023885:46126373:G:A	17	46126373	0.103551	0.990068	0	G	A	-0.0104	0.7898	-0.0868	0.275
rs151315565:46054026:G:A	17	46054026	0.00148298	0.817929	0	G	A	-0.0863	0.7906	1.4222	0.02877
rs7406338:46045484:C:G	17	46045484	0.728449	0.994483	0	C	G	-0.0071	0.7916	0.0353	0.5161
17:45990216:T:TTTTG	17	45990216	0.00396595	0.56505	0	T	TTTTG	-0.0612	0.7921	0.2898	0.5365
rs2597168:46048165:T:C	17	46048165	0.728966	1	0	T	C	-0.007	0.7928	0.0324	0.5516
rs2255697:46048168:C:T	17	46048168	0.728966	1	0	C	T	0.007	0.7928	-0.0324	0.5516
17:46084343:C:T	17	46084343	0.00096595	0.548762	0	C	T	0.123	0.7934	0.4902	0.6032
chr17_46048592_A_G	17	46048592	0.729449	1	1	A	G	-0.007	0.7938	0.033	0.5438
rs76849509:45967285:G:A	17	45967285	0.004	0.919938	0	G	A	0.0515	0.7966	0.5518	0.176
17:45957891:C:T	17	45957891	0.001	0.567582	0	C	T	0.123	0.7968	0.2319	0.8039
17:46046754:C:G	17	46046754	0.00951702	0.786517	0	C	G	-0.0344	0.7986	-0.5351	0.04956
17:46074132:G:GCAGCC	17	46074132	0.00251702	0.372074	0	G	GCAGCC	-0.1025	0.7987	-0.4314	0.6131
rs2240123	17	46153296	0.127313	1	1	C	T	0.0091	0.7989	0.0509	0.484
rs147883701:46019322:C:T	17	46019322	0.037517	0.98517	0	C	T	0.0161	0.7992	0.1479	0.2486
rs2905845:46046780:G:T	17	46046780	0.728966	0.999	0	G	T	0.0067	0.8008	-0.0316	0.5605
rs188634854:46047735:A:G	17	46047735	0.00448298	0.844823	0	A	G	-0.0516	0.8034	0.0521	0.9047
rs3834970:46124390:GA:G	17	46124390	0.104551	0.996517	0	GA	G	-0.0095	0.8061	-0.0918	0.2456
rs139995038:46046551:T:C	17	46046551	0.001	0.759062	0	T	C	0.1383	0.8071	-1.1458	0.3195
rs67582828	17	46153028	0.554789	1	1	C	CA	0.0058	0.8098	-0.017	0.7296
rs79390440:46021853:C:T	17	46021853	0.00951702	0.840136	0	C	T	0.0319	0.8113	-0.5347	0.04958
17:46156437:G:C	17	46156437	0.00403405	0.905594	0	G	C	-0.0484	0.8115	-0.4414	0.2887
rs143292598:46090310:C:T	17	46090310	0.00351702	0.630622	0	C	T	-0.0631	0.8119	-0.0091	0.9869
rs66754689:46107655:AACAC:A	17	46107655	0.188279	0.966517	0	AACAC	A	-0.0073	0.8131	-0.01	0.874
rs3764396	17	46015969	0.435142	1	1	T	C	-0.0057	0.8146	-0.0536	0.2773
chr17_46090769_G_T	17	46090769	0.270789	1	1	G	T	-0.0063	0.815	-0.0211	0.699
rs2325748:45974251:C:T	17	45974251	0.297313	0.994517	0	C	T	0.0061	0.8153	0.0965	0.0715
17:46100644:ATTT:AT	17	46100644	0.107551	0.995	0	ATTT	AT	-0.009	0.8156	-0.07	0.37
rs142021607:46077647:C:T	17	46077647	0.000517025	0.751507	0	C	T	-0.1656	0.8159	0.2785	0.848
rs145362694:46089556:G:A	17	46089556	0.00651702	0.766328	0	G	A	-0.0391	0.816	-0.6326	0.06457
17:45978515:CTTT:CTTTT	17	45978515	0.321483	0.954517	0	CTTT	CTTTT	0.006	0.8165	-0.0885	0.09558
rs75063958:46057674:G:A	17	46057674	0.038517	0.999	0	G	A	0.0142	0.8182	0.1286	0.3046
rs188351757:46127735:G:A	17	46127735	0.00348298	0.904381	0	G	A	0.0444	0.8208	1.3187	0.0009279
rs117791644:46146675:C:T	17	46146675	0.0669319	0.975136	0	C	T	-0.0107	0.8234	0.0709	0.4663
rs60869494:46141430:C:CA	17	46141430	0.002	0.494118	0	C	CA	-0.0789	0.8256	-0.3103	0.6753
rs34538173:46050036:G:GT	17	46050036	0.704415	0.931483	0	G	GT	-0.0059	0.8259	0.0157	0.7748
rs185293095:46140583:G:A	17	46140583	0.000517025	0.463284	0	G	A	-0.1677	0.8279	-1.4157	0.3786
rs11079802	17	46010380	0.288313	1	1	G	C	0.0057	0.8293	0.0748	0.1648
rs186744709:46077282:C:T	17	46077282	0.000517025	0.457767	0	C	T	-0.1647	0.8311	-1.4602	0.3643
17:46099259:A:ATTTTTTTTTTT	17	46099259	0.35	0.982483	0	A	ATTTTTTTTTTT	0.0054	0.8315	-0.036	0.485
rs144298070:45956199:G:A	17	45956199	0.000482975	0.783121	0	G	A	0.1006	0.8323	-0.9645	0.3381
chr17_46126493_G_INDEL	17	46126492	0.105034	1	1	AG	A	-0.0082	0.8325	-0.0908	0.2494
rs146084401:46000197:G:A	17	46000197	0.0435511	0.996517	0	G	A	0.0123	0.8329	0.0816	0.4891
rs11079800:45965966:C:T	17	45965966	0.284381	0.993	0	C	T	0.0056	0.8337	0.0961	0.07697
rs142592709:45997252:T:C	17	45997252	0.001	0.346381	0	T	C	0.1008	0.8339	0.6052	0.5367
rs16949579:46007970:G:C	17	46007970	0.002	0.362777	0	G	C	0.0918	0.8353	-0.33	0.711
rs111639853:46060959:C:T	17	46060959	0.0236532	0.968306	0	C	T	-0.0166	0.8354	0.1592	0.3307
rs56771634:46078406:G:A	17	46078406	0.003	0.515832	0	G	A	-0.0555	0.8364	0.477	0.38
rs11655068:46014184:G:A	17	46014184	0.435142	1	0	G	A	0.0049	0.8387	0.0562	0.2548
rs200755189:46055160:T:C	17	46055160	0.00148298	0.385186	0	T	C	-0.0919	0.8391	-1.4577	0.1032
rs11303505:46065827:CA:C	17	46065827	0.690966	0.955136	0	CA	C	0.0054	0.8393	0.0333	0.538
17:46097422:G:A	17	46097422	0.000482975	0.343749	0	G	A	-0.1611	0.8416	2.2928	0.1531
rs117588849:46041164:G:T	17	46041164	0.005	0.54556	0	G	T	0.0431	0.8424	0.2002	0.6458
rs187959271:46115222:C:A	17	46115222	0.0882043	0.974034	0	C	A	-0.0086	0.8426	-0.006	0.9459
rs71377322:45958467:G:A	17	45958467	0.0138638	0.995415	0	G	A	-0.0198	0.8434	-0.0622	0.7577
17:46069545:G:A	17	46069545	0.003	0.613966	0	G	A	0.0561	0.845	0.2171	0.7028
rs117974417:46156510:C:G	17	46156510	0.143034	0.989	0	C	G	0.0067	0.8456	0.038	0.5936
rs35367450:45968785:AC:A	17	45968785	0.0143808	0.969245	0	AC	A	-0.0193	0.8462	-0.0377	0.8509
rs4369725:46006687:T:C	17	46006687	0.434142	0.999517	0	T	C	-0.0047	0.8472	-0.0574	0.2453
rs149637911:46073645:T:C	17	46073645	0.00703405	0.772811	0	T	C	0.0312	0.8489	0.6317	0.05782
rs117180213:46070227:C:A	17	46070227	0.0155511	0.962136	0	C	A	0.0186	0.8499	-0.357	0.07536
rs11655352:46014128:C:G	17	46014128	0.435142	0.999	0	C	G	-0.0046	0.85	-0.0599	0.2249
rs72833480:45964861:G:A	17	45964861	0.284381	0.993	0	G	A	0.005	0.8515	0.0986	0.06964
17:46149258:A:T	17	46149258	0.003	0.884381	0	A	T	-0.0469	0.8518	-0.1917	0.6939
17:46149256:G:A	17	46149256	0.003	0.884381	0	G	A	0.0469	0.8518	0.1917	0.6939
rs76733140:46075058:C:T	17	46075058	0.038517	0.995483	0	C	T	0.0115	0.8519	0.117	0.3513
rs71377324:45981357:A:G	17	45981357	0.343796	0.998	0	A	G	-0.0047	0.8524	-0.0971	0.05778
rs183585724:45964214:C:A	17	45964214	0.0435511	0.979585	0	C	A	0.0108	0.8535	0.0663	0.5772
rs144528439:46060949:C:T	17	46060949	0.00551702	0.76387	0	C	T	0.0347	0.8535	-0.0923	0.812
rs200329132:45998374:TC:T	17	45998374	0.02	0.993517	0	TC	T	0.016	0.8538	0.1121	0.5282
rs76757053:46156945:T:A	17	46156945	0.0268638	1	0	T	A	0.0137	0.854	0.0787	0.6107
rs11650395:45989025:A:C	17	45989025	0.296796	0.995517	0	A	C	-0.0048	0.8553	-0.0962	0.07239
rs34190379:46063252:G:A	17	46063252	0.210068	1	0	G	A	-0.0053	0.8558	-0.0073	0.9035
rs191750537:45964213:G:C	17	45964213	0.0435511	0.979585	0	G	C	0.0107	0.8558	0.0664	0.5767
rs150853499:45994116:G:T	17	45994116	0.00196595	0.490328	0	G	T	-0.0762	0.8559	-0.8904	0.2917
rs188750229:46081594:C:T	17	46081594	0.003	0.726755	0	C	T	0.0475	0.856	0.843	0.1098
rs11652827:46012505:C:T	17	46012505	0.435142	1	0	C	T	0.0044	0.8564	0.0566	0.2518
rs11659126:46010108:G:A	17	46010108	0.435142	1	0	G	A	0.0043	0.857	0.0566	0.2517
rs75777338:46014452:G:T	17	46014452	0.00196595	0.490913	0	G	T	-0.0745	0.8582	-0.9147	0.2751
rs72840237:45998050:G:A	17	45998050	0.435142	0.997	0	G	A	0.0042	0.8611	0.0562	0.2556
17:46006486:G:A	17	46006486	0.001	0.626125	0	G	A	-0.0875	0.8617	0.3174	0.758
rs143702930:46146373:C:T	17	46146373	0.005	0.672907	0	C	T	-0.0377	0.8618	0.3568	0.4374
rs76012308:45966706:G:A	17	45966706	0.0487617	0.953517	0	G	A	0.0097	0.8643	0.2166	0.06265
rs144693170:46129586:G:A	17	46129586	0.0108979	0.915108	0	G	A	0.0195	0.8658	0.2495	0.2867
17:46043414:G:A	17	46043414	0.002	0.569	0	G	A	-0.0601	0.8658	0.6102	0.3969
rs59811700:45988533:G:A	17	45988533	0.297313	0.995	0	G	A	0.0044	0.8662	0.0964	0.07163
rs117415513:46050218:A:G	17	46050218	0.0104489	0.893449	0	A	G	-0.0197	0.8693	-0.0329	0.8929
17:46076888:AAAAAC:A	17	46076888	0.008	0.616266	0	AAAAAC	A	-0.0265	0.8696	0.3222	0.3204
rs7503584	17	46055036	0.209585	1	1	G	A	-0.0047	0.8719	-0.0102	0.865
rs34593510:46001535:G:A	17	46001535	0.434142	0.999	0	G	A	0.0039	0.872	0.0576	0.2433
rs189726960:46098507:G:C	17	46098507	0.00644893	0.902919	0	G	C	0.0259	0.8725	0.2042	0.526
17:46154794:TGTTTTTTTTTTTGTTTTTTTTG:T	17	46154794	0.562381	0.952	0	TGTTTTTTTTTTTGTTTTTTTTG	T	-0.0039	0.874	-0.0228	0.6507
rs1130932:46002744:G:T	17	46002744	0.434142	0.999	0	G	T	0.0038	0.8743	0.0575	0.2447
rs16949422:45992632:C:G	17	45992632	0.00148298	0.647427	0	C	G	0.0609	0.8768	-0.69	0.375
rs16949875:46046377:T:C	17	46046377	0.00348298	0.510811	0	T	C	0.039	0.8777	-0.387	0.4488
rs9899623:46094038:G:T	17	46094038	0.0287957	0.993966	0	G	T	-0.011	0.8782	0.1661	0.2653
rs2318118	17	46007232	0.434142	1	1	G	A	0.0037	0.8786	0.0553	0.2623
rs145920997:45967501:TGAG:T	17	45967501	0.002	0.341951	0	TGAG	T	-0.047	0.8786	1.6091	0.009699
rs7209484:46143042:T:C	17	46143042	0.22834	0.993034	0	T	C	0.0043	0.879	0.0226	0.698
rs11654627:46137021:G:A	17	46137021	0.0310681	0.998517	0	G	A	-0.0107	0.8793	0.0791	0.5814
rs145682182:45964948:A:G	17	45964948	0.044034	0.979585	0	A	G	-0.0087	0.8812	-0.0829	0.4836
rs12952517:45969393:C:A	17	45969393	0.0138638	0.992034	0	C	A	-0.015	0.8819	-0.0538	0.7911
17:46017260:T:G	17	46017260	0.00951702	0.594904	0	T	G	0.0243	0.8837	-0.0358	0.915
17:46017259:C:G	17	46017259	0.00951702	0.594904	0	C	G	0.0243	0.8837	-0.0358	0.915
17:46017258:A:G	17	46017258	0.00951702	0.594904	0	A	G	0.0243	0.8837	-0.0358	0.915
17:46124994:A:ACCGCCAACGTT	17	46124994	0.164483	0.860449	0	A	ACCGCCAACGTT	-0.0051	0.8849	0.0167	0.8178
rs4794373	17	46093858	0.0784149	1	1	A	G	-0.0064	0.8851	-0.0525	0.5557
rs141502862:45993467:C:T	17	45993467	0.0435511	0.996517	0	C	T	0.0084	0.8852	0.0776	0.5099
rs56124407:45956784:T:C	17	45956784	0.0813808	0.978068	0	T	C	0.0061	0.8889	0.1106	0.2145
rs12939572:45981278:T:C	17	45981278	0.344796	0.998	0	T	C	-0.0035	0.889	-0.0967	0.05887
rs150152088:46020436:A:G	17	46020436	0.001	0.780334	0	A	G	0.0619	0.8913	-1.034	0.264
rs2229358	17	45994154	0.435177	1	1	G	A	0.0033	0.8918	0.0642	0.1941
17:46093204:A:T	17	46093204	0.00748298	0.764768	0	A	T	-0.0214	0.8964	-0.313	0.3448
rs71366805:45982079:G:GT	17	45982079	0.344279	0.998517	0	G	GT	-0.0031	0.9	-0.0972	0.05741
rs56928103:45954609:A:G	17	45954609	0.0813808	0.972551	0	A	G	0.0055	0.9005	0.1047	0.2409
rs73325389:46104645:A:G	17	46104645	0.0287957	0.987483	0	A	G	0.009	0.9006	-0.159	0.2885
rs2240121:46152322:T:C	17	46152322	0.101034	0.998517	0	T	C	0.0049	0.9019	0.1065	0.1836
rs12949191:45996788:A:T	17	45996788	0.438108	0.991	0	A	T	-0.003	0.9021	-0.0598	0.2272
rs147596700:45963810:G:A	17	45963810	0.0425511	0.981068	0	G	A	0.0072	0.9027	0.0814	0.4967
rs7207225	17	45985414	0.344796	1	1	A	G	-0.003	0.903	-0.0987	0.05336
rs139490969:45962994:C:T	17	45962994	0.0425511	0.981068	0	C	T	0.0072	0.9031	0.0816	0.4958
rs28624980:46106078:G:A	17	46106078	0.0297957	0.978932	0	G	A	-0.0086	0.9037	0.1708	0.2492
rs78034826:46113667:A:C	17	46113667	0.0758979	0.992585	0	A	C	0.0054	0.9039	-0.0637	0.484
rs144822160:46068905:C:T	17	46068905	0.000517025	0.581782	0	C	T	0.0838	0.906	-0.1051	0.941
rs140678315:45964945:C:T	17	45964945	0.0425511	0.980585	0	C	T	0.0068	0.9083	0.0819	0.4938
rs8078698:46108951:A:C	17	46108951	0.0287957	0.984517	0	A	C	0.0081	0.9106	-0.1465	0.3276
rs142301643:46112109:G:A	17	46112109	0.0758979	0.993068	0	G	A	-0.005	0.9115	0.0631	0.4876
rs80059914:46098091:C:T	17	46098091	0.0758979	0.997483	0	C	T	-0.0048	0.9142	0.0595	0.5122
rs186630782:46080923:C:G	17	46080923	0.003	0.529208	0	C	G	-0.0339	0.9149	0.1602	0.7999
rs7213084:45956580:A:T	17	45956580	0.0813808	0.977585	0	A	T	0.0046	0.916	0.1157	0.1933
rs7211357:45956579:G:T	17	45956579	0.0813808	0.977585	0	G	T	-0.0046	0.916	-0.1157	0.1933
rs61406735:46107036:T:C	17	46107036	0.015966	0.574517	0	T	C	-0.0141	0.9164	0.3116	0.2467
rs11448169:46049459:G:GA	17	46049459	0.679551	0.861	0	G	GA	-0.0028	0.9181	0.0082	0.883
rs193158901:46085690:C:T	17	46085690	0.010034	0.892579	0	C	T	-0.0129	0.9182	-0.6279	0.01568
rs72823595:46124860:A:G	17	46124860	0.004	0.969272	0	A	G	0.0193	0.9185	-0.3632	0.3529
rs199659813:45967427:GT:G	17	45967427	0.0425511	0.980585	0	GT	G	0.0059	0.9202	0.0829	0.4881
rs9944405:45953033:T:A	17	45953033	0.0828638	0.972517	0	T	A	-0.0043	0.9218	-0.1233	0.1637
17:46121765:CTTTTTTTTTTTT:C	17	46121765	0.229932	0.920034	0	CTTTTTTTTTTTT	C	0.0029	0.9219	-0.0277	0.6486
rs12453773:45952431:T:C	17	45952431	0.0828638	0.969034	0	T	C	0.0042	0.9232	0.1309	0.1405
rs8082055:45955103:C:T	17	45955103	0.0828638	0.974551	0	C	T	-0.0042	0.9242	-0.1129	0.2017
rs12232488:45970144:G:A	17	45970144	0.0813808	0.992585	0	G	A	-0.0041	0.9251	-0.104	0.2395
rs371184774:46085585:CTAAAAAAAAAATA:C	17	46085585	0.0656532	0.760177	0	CTAAAAAAAAAATA	C	0.0053	0.9255	-0.0662	0.5676
rs374822508:46085599:CAAAAAAAAAATT:C	17	46085599	0.0656532	0.760177	0	CAAAAAAAAAATT	C	0.0052	0.9257	-0.0662	0.5675
rs7214154:45958723:C:T	17	45958723	0.0813808	0.984068	0	C	T	-0.004	0.9266	-0.1152	0.194
rs9899097:45989046:T:C	17	45989046	0.343796	0.997517	0	T	C	-0.0023	0.9267	-0.0946	0.06468
rs72534733:45952451:TTCTTC:T	17	45952451	0.0828638	0.972551	0	TTCTTC	T	-0.004	0.9276	-0.1345	0.1297
rs78785116:46002738:G:A	17	46002738	0.00351702	0.801926	0	G	A	-0.0204	0.9279	-0.0498	0.9128
rs16949418:45991240:C:T	17	45991240	0.294347	0.989068	0	C	T	0.0024	0.9285	0.0949	0.07788
rs7217147:45958903:G:A	17	45958903	0.0813808	0.985068	0	G	A	-0.0039	0.9286	-0.1151	0.1943
chr17_46124276_C_T	17	46124276	0.183102	1	1	C	T	0.0027	0.9309	-0.0461	0.4739
rs7211900:45956816:T:C	17	45956816	0.0823808	0.977551	0	T	C	0.0037	0.9317	0.1123	0.2036
rs186311143:46113966:C:A	17	46113966	0.005	0.88566	0	C	A	0.0156	0.9321	0.3749	0.3181
rs78286754:45956270:T:A	17	45956270	0.0823808	0.976034	0	T	A	-0.0036	0.9347	-0.1117	0.2062
rs78997383:45968995:G:A	17	45968995	0.0425511	0.980585	0	G	A	0.0047	0.9361	0.0837	0.4839
rs78160169:45960746:A:G	17	45960746	0.0813808	0.991551	0	A	G	0.0033	0.9389	0.1144	0.1957
rs74253633:45960314:C:T	17	45960314	0.0813808	0.991551	0	C	T	-0.0033	0.939	-0.1145	0.1953
rs58695897:45960948:C:A	17	45960948	0.0813808	0.991551	0	C	A	-0.0033	0.9397	-0.1144	0.1955
rs150752051:45970975:T:G	17	45970975	0.0430681	0.980585	0	T	G	-0.0043	0.9414	-0.0768	0.5183
rs112195187:45948357:A:G	17	45948357	0.00148298	0.911932	0	A	G	0.0232	0.9451	0.2634	0.6864
rs192547075:45976553:T:C	17	45976553	0.00644893	0.935523	0	T	C	0.0104	0.9457	-0.1486	0.6258
rs56218899:45967279:G:A	17	45967279	0.0813808	0.991585	0	G	A	-0.0029	0.9474	-0.1209	0.1718
rs184804668:46006245:C:T	17	46006245	0.00151702	0.465321	0	C	T	-0.03	0.9504	-0.1221	0.9053
rs8182261:45970263:C:T	17	45970263	0.265864	0.982517	0	C	T	0.0016	0.9531	0.0535	0.337
rs10459927:45981536:T:C	17	45981536	0.426625	0.998	0	T	C	0.0014	0.9533	-0.0685	0.1646
rs143279210:45973151:G:C	17	45973151	0.0430681	0.981585	0	G	C	0.0034	0.9543	0.0884	0.4589
rs148534009:46114200:G:A	17	46114200	0.00151702	0.610195	0	G	A	0.0228	0.955	-0.0394	0.9633
rs146199012:45973793:A:T	17	45973793	0.0430681	0.981585	0	A	T	-0.0032	0.9562	-0.0899	0.4513
rs4614773:45963573:G:A	17	45963573	0.0813808	0.991585	0	G	A	-0.0023	0.9576	-0.1174	0.1846
rs371324879:45954366:A:G	17	45954366	0.00196595	0.521446	0	A	G	0.0184	0.9579	-0.0279	0.9675
rs62064915:46129074:C:G	17	46129074	0.00351702	0.825987	0	C	G	-0.011	0.9603	0.1407	0.7505
rs141612510:45987374:C:T	17	45987374	0.0435511	0.989551	0	C	T	0.0029	0.9606	0.0868	0.462
rs192465160:45948008:C:T	17	45948008	0.001	0.427498	0	C	T	-0.0249	0.9615	0.0687	0.95
rs2325751:46017801:T:G	17	46017801	0.438074	0.998517	0	T	G	-0.0011	0.9623	-0.0532	0.2809
rs16949270	17	45982473	0.0803808	1	1	C	T	0.002	0.9639	-0.1038	0.2414
rs12601827:46016613:A:G	17	46016613	0.437591	1	0	A	G	-0.0011	0.9649	-0.0524	0.2875
rs149784060:45981323:T:C	17	45981323	0.0803808	0.999	0	T	C	-0.0019	0.9658	0.1041	0.2401
rs74853612:45978646:T:C	17	45978646	0.0803808	0.997551	0	T	C	-0.0018	0.9675	0.1046	0.2385
rs11652185:46016906:C:T	17	46016906	0.437591	1	0	C	T	0.001	0.9676	0.0535	0.278
rs2325747:45974285:C:T	17	45974285	0.426625	0.996034	0	C	T	-0.001	0.9681	0.0654	0.1844
rs1133221:45976389:T:G	17	45976389	0.0798979	0.996551	0	T	G	-0.0017	0.9682	0.105	0.2371
rs56006220:45975989:T:C	17	45975989	0.0798979	0.996068	0	T	C	-0.0017	0.9683	0.105	0.2369
rs76236083:46090005:A:T	17	46090005	0.00248298	0.748053	0	A	T	-0.0101	0.9687	0.8249	0.1012
rs186304463:45953982:G:A	17	45953982	0.00248298	0.621666	0	G	A	0.0132	0.969	-0.5628	0.4033
rs11079801:45997076:G:C	17	45997076	0.439625	0.996517	0	G	C	-0.0009	0.9708	0.0521	0.2912
rs4450442:45965943:T:G	17	45965943	0.0813808	0.991585	0	T	G	0.0014	0.9738	0.1199	0.1755
rs57263871:45951158:C:T	17	45951158	0.402245	0.960102	0	C	T	0.0008	0.9744	0.06	0.2361
rs6503934	17	46013650	0.437591	1	1	T	C	-0.0007	0.9754	-0.0529	0.2836
rs61702159:45966715:C:T	17	45966715	0.0813808	0.991585	0	C	T	-0.0013	0.976	-0.1199	0.1756
rs7219107:45968591:G:A	17	45968591	0.138313	0.988068	0	G	A	-0.0008	0.9824	-0.0516	0.4621
rs4503839:46011307:C:G	17	46011307	0.437591	1	0	C	G	-0.0005	0.9849	-0.053	0.2823
rs34606313:46010800:C:CAG	17	46010800	0.437591	1	0	C	CAG	0.0005	0.9849	0.053	0.2823
rs149285056:46092703:C:T	17	46092703	0.00348298	0.602653	0	C	T	0.0053	0.9851	-0.7502	0.2033
rs117282161:45959490:G:A	17	45959490	0.0128979	0.918598	0	G	A	-0.0019	0.9861	0.1566	0.4866
rs8071003:46009888:T:C	17	46009888	0.437591	1	0	T	C	-0.0004	0.9862	-0.053	0.282
rs146179117:46155814:A:C	17	46155814	0.003	0.947858	0	A	C	-0.0036	0.9864	0.6179	0.1482
rs143175555:46025728:G:A	17	46025728	0.0109319	0.893177	0	G	A	0.0018	0.9874	0.0892	0.7053
rs200114569:46114572:C:G	17	46114572	0.004	0.967204	0	C	G	-0.0029	0.9879	-0.2361	0.5526
rs35839416:46005792:A:ACT	17	46005792	0.437591	0.999517	0	A	ACT	0.0003	0.9892	-0.0536	0.2768
rs2228253:45994044:C:T	17	45994044	0.438108	1	0	C	T	-0.0003	0.9896	0.0615	0.2121
rs2228251	17	45994094	0.438108	1	1	T	C	0.0002	0.9928	-0.0616	0.2118
rs8066893:46009812:A:G	17	46009812	0.437591	1	0	A	G	-0.0002	0.9936	-0.0534	0.2784
rs9895863:46007029:A:G	17	46007029	0.437591	1	0	A	G	0.0001	0.9951	-0.0535	0.278
rs7208707:45994724:A:C	17	45994724	0.438108	0.999	0	A	C	-0.0001	0.9959	-0.0599	0.225
17:46132391:T:C	17	46132391	0.002	0.811313	0	T	C	0.0013	0.9962	-0.1057	0.8467
17:46128195:G:C	17	46128195	0.002	0.67087	0	G	C	-0.0014	0.9966	0.2931	0.655
17:46128194:G:T	17	46128194	0.002	0.67087	0	G	T	-0.0014	0.9966	0.2931	0.655
rs12939739:46003188:A:G	17	46003188	0.437591	0.999	0	A	G	-0.0001	0.9974	-0.0539	0.2748
rs36124074:46003859:T:G	17	46003859	0.437591	0.999	0	T	G	0.0001	0.9981	-0.0537	0.276
rs67194241:46003889:C:G	17	46003889	0.437591	0.999	0	C	G	0.0001	0.9982	-0.0537	0.2761
rs9903223:46008257:C:G	17	46008257	0.437591	1	0	C	G	0	0.9999	-0.0511	0.2997
rs73985430:45960639:C:G	17	45960639	0.000482975	0.266339	0	C	G	NULL	NULL	NULL	NULL
rs62067384:46027153:G:A	17	46027153	0.00151702	0.108641	0	G	A	NULL	NULL	NULL	NULL
rs371153948:46129831:G:T	17	46129831	0.000482975	0.291953	0	G	T	NULL	NULL	NULL	NULL
rs201261614:46115084:T:TGG	17	46115084	0.999	0.24243	0	T	TGG	NULL	NULL	NULL	NULL
rs190270638:46121609:T:C	17	46121609	0.00148298	0.237827	0	T	C	NULL	NULL	NULL	NULL
rs188926419:45951052:G:C	17	45951052	0.000482975	0.180437	0	G	C	NULL	NULL	NULL	NULL
rs185589060:45965727:G:A	17	45965727	0.000517025	0.185009	0	G	A	NULL	NULL	NULL	NULL
rs180865298:45962917:G:A	17	45962917	0.000517025	0.184492	0	G	A	NULL	NULL	NULL	NULL
rs148972104:46049621:G:T	17	46049621	0.000482975	0.202397	0	G	T	NULL	NULL	NULL	NULL
17:46096392:A:G	17	46096392	0.001	0.280235	0	A	G	NULL	NULL	NULL	NULL
17:46011193:G:A	17	46011193	0.001	0.0817554	0	G	A	NULL	NULL	NULL	NULL
