# Supplementary material for: CDK5RAP3, a New BRCA2 Partner That Regulates DNA Repair, Is Associated with Breast Cancer Survival
Source: Cancers (Basel). 2022 Jan 12;14(2):353. doi: 10.3390/cancers14020353 (PMC8773632; doi:10.3390/cancers14020353)
Supplement: Supplementary file 1 [file cancers-14-00353-s001.zip › Table S2.xlsx]

## Sheet: Table S2
Table S2. Functional annotation of potentially associated variants at the CDK5RAP3 locus
Chromosome	Position	SNP ID	Reference allele	Alternative allele	Chromatin statesa	Open chromatin	Histone modificationsb	Predicted target in breast cellsc	SUPER enhancer	RegulomeDB scored	RegulomeDB note
17	46039945	rs145489940	T	C						6
17	46046754	rs536194633	C	G				CDK5RAP3: ChIA-PET: MCF7		no data available
17	46072710	rs77563750	G	A			H3K9ac:Breast Myoepithelial Primary Cells			2b	likely to bind smad3 - determined by position weight matrix (PWM)
17	46077099	rs17617360	A	G	Weak enhancer: Breast Myoepithelial Primary Cells	Dnase: HMEC; Dnase; ovary	H3K9ac:Breast Myoepithelial Primary Cells			2b	likely to bind CTCF in MCF7 cells - determined by Chip-Seq
17	46078582	rs184639988	A	G						5
17	46081915	rs2905855	G	A	Weak enhancer: Breast Myoepithelial Primary Cells; enhancer: HMEC (Core 15-state model)		H3K4me1: Breast Myoepithelial Primary Cells; H3K4me1: HMEC	ChIA-PET: MCF7		5
17	46082957	rs6503964	T	G	Weak enhancer: Breast Myoepithelial Primary Cells ; enhancer: HMEC (Core 15-state model)		H3K4me1: Breast Myoepithelial Primary Cells	ChIA-PET: MCF7		5
17	46140440	rs201764131	C	CA					HMEC	6
a 25-state chromatin state segmentation HMM modeling from Roadmap Epigenomics Project. Format = chromatin state:cell type
b Histone modification ChIP-seq (Roadmap Epigenomics Consortium). Format = histone mark:cell type
c SNP lies in a putative regulatory element predicted to regulate the listed gene, reported by methods IM-PET, Hnisz, Chia-PET, Hi-C, 3C, 4C, 5C. Format = target:method:cell type
d RegulomeDB score. Score (http://regulomedb.org/help#score). Scale: 1 is most ilkely to be functional, to 7 = least likely.
